# Supplementary material for: Copper iodide nanoparticles supported on magnetic aminomethylpyridine functionalized cellulose: a new heterogeneous and recyclable nanomagnetic catalyst for facile access to N-sulfonylamidines under solvent free conditions
Source: Royal Society of Chemistry journal article supplement (doi:10.1039/c6ra13251k), 2016-01-01
Supplement: c6ra13251k1.pdf [file c6ra13251k1.pdf]

## Supporting Information

### Copper Iodide nanoparticles supported on magnetic aminomethylpyridine functionalized cellulose: a new heterogeneous and recyclable nanomagnetic catalyst for the facile access to *N*-sulfonylamidines under solvent free conditions

Zarrin Ghasemi,\* Salman Shojaei and Aziz Shahrisa

#### Experimental section

#### 4-Methyl-*N*-[1-morpholino-2-phenylethylidene] benzenesulfonamide (**4a**):

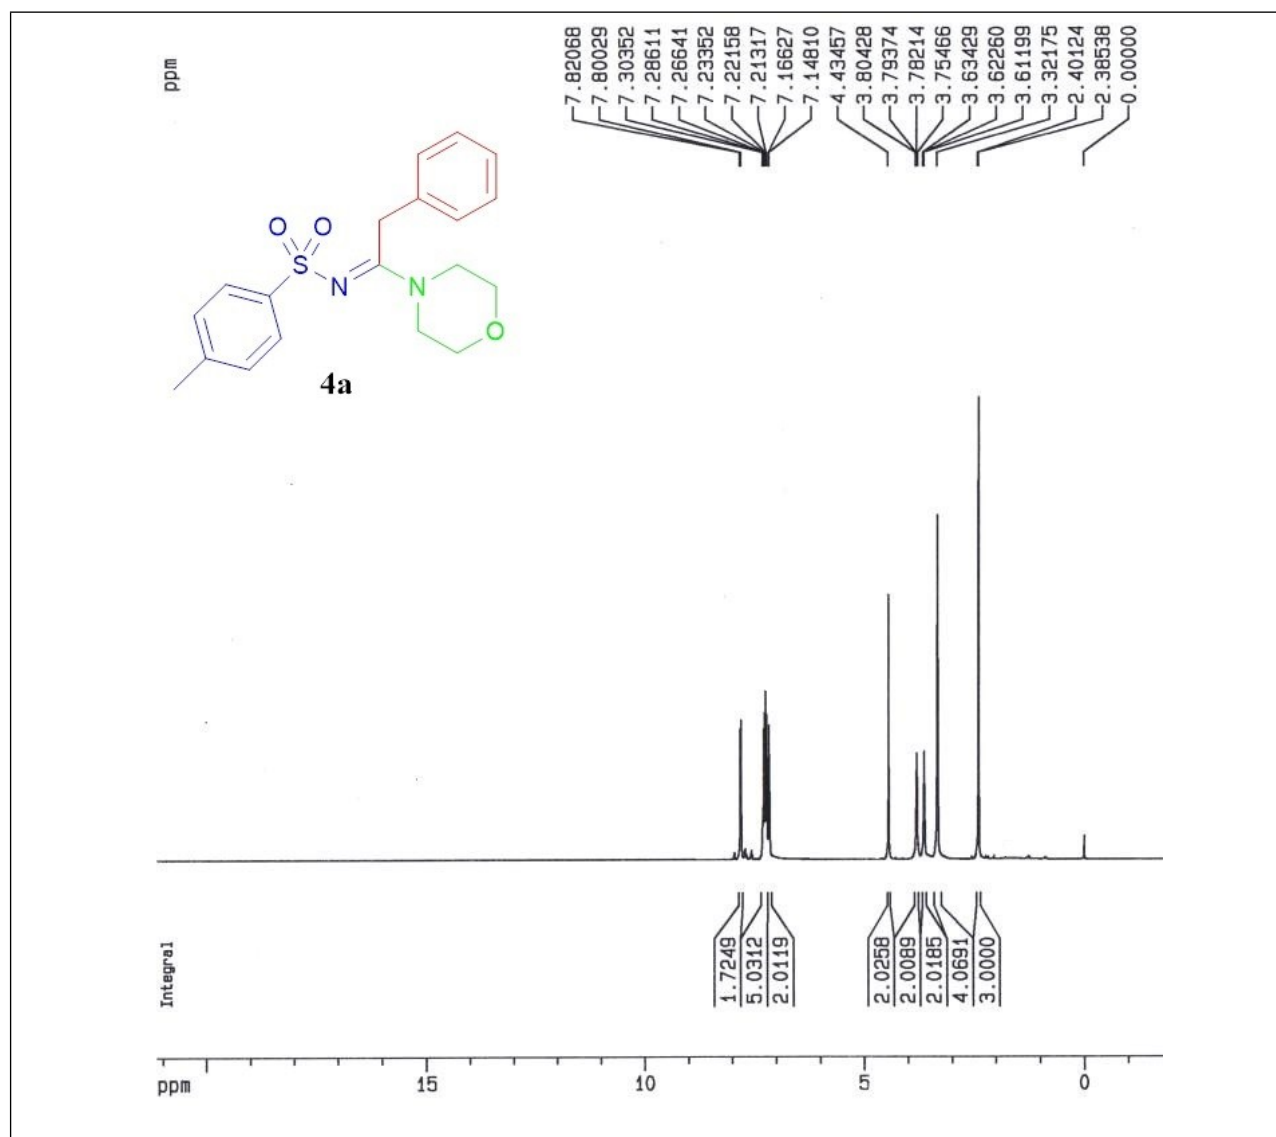

Figure 1: <sup>1</sup>H NMR spectrum (400 MHz) of compound **4a** in CDCl<sub>3</sub>.

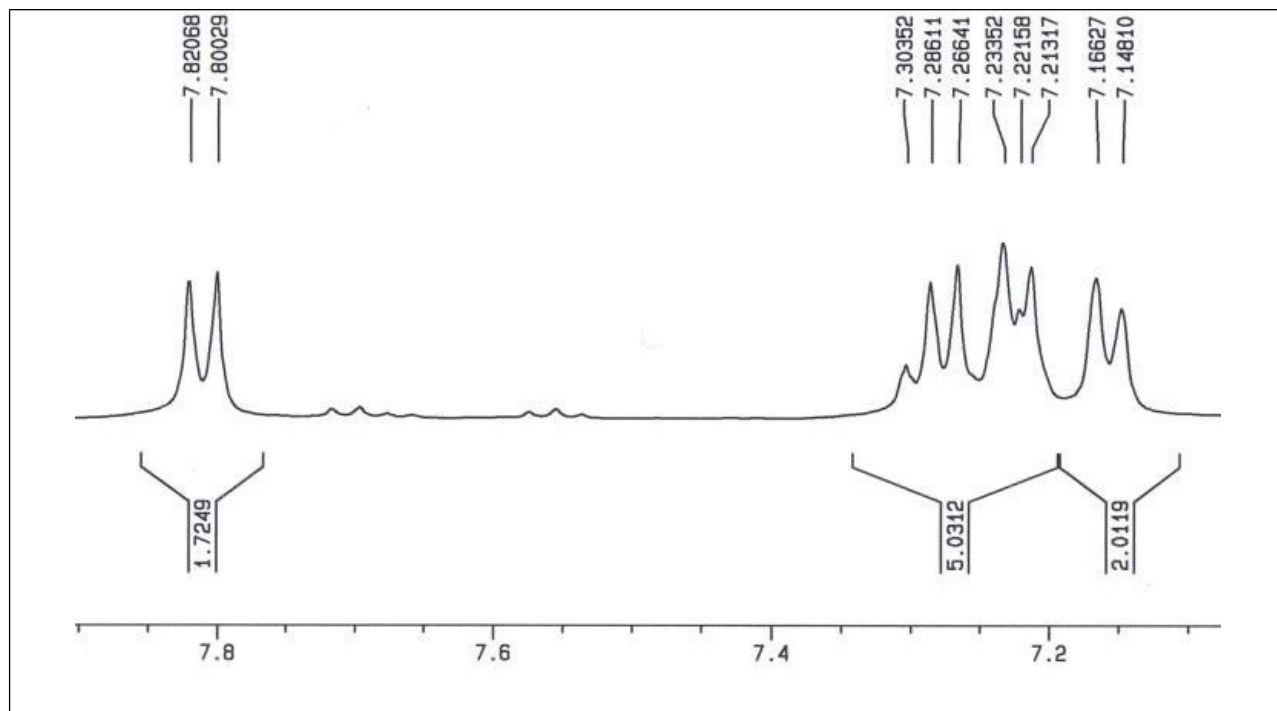

**Figure 2:** Expanded (1)  $^1\text{H}$  NMR spectrum (400 MHz) of compound **4a** in  $\text{CDCl}_3$ .

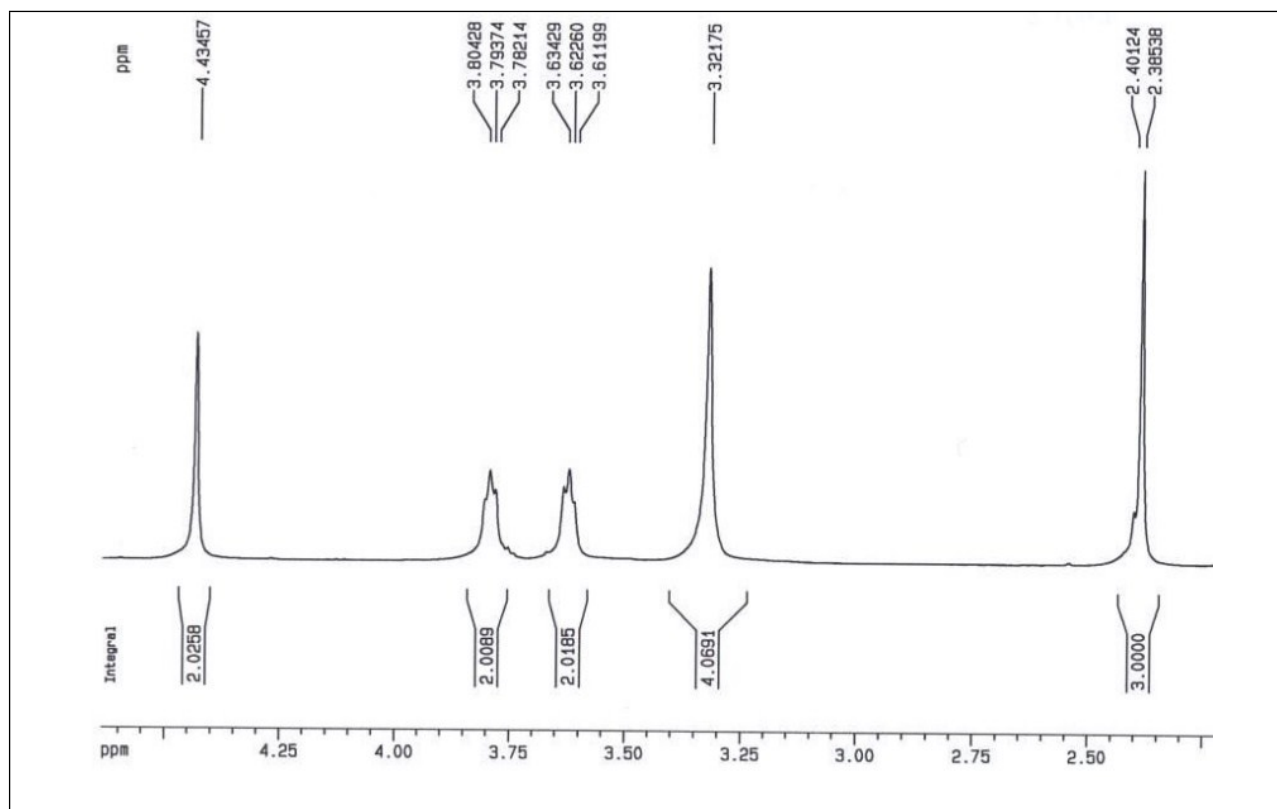

**Figure 3:** Expanded (2)  $^1\text{H}$  NMR spectrum (400 MHz) of compound **4a** in  $\text{CDCl}_3$ .

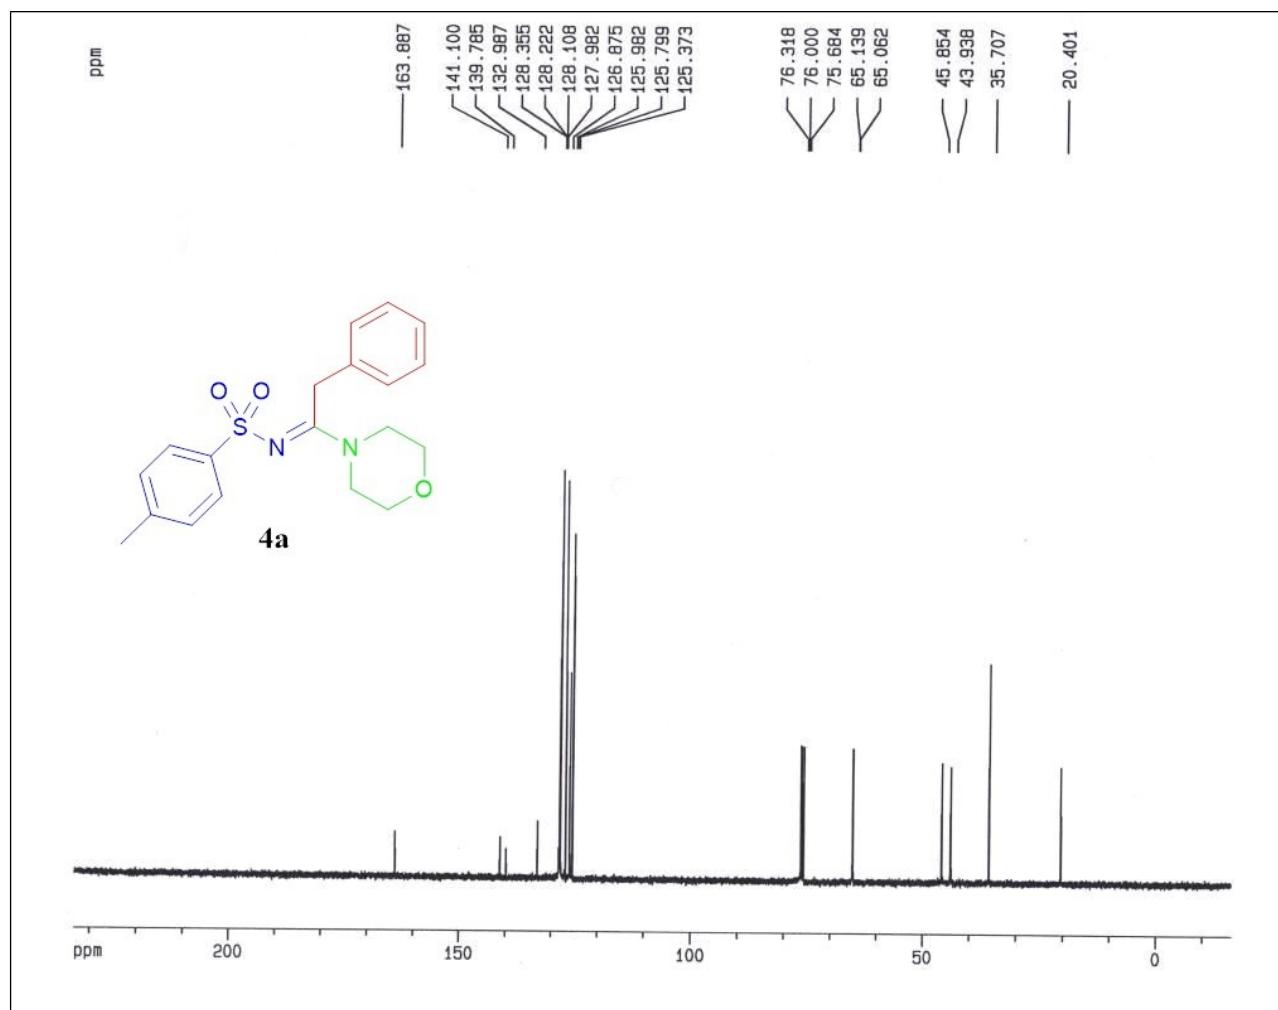

**Figure 4:** <sup>13</sup>C NMR spectrum (100 MHz) of compound **4a** in CDCl<sub>3</sub>.

**4-Methyl-N-[2-phenyl-1-(piperidin-1-yl) ethylidene] benzenesulfonamide (4b):**

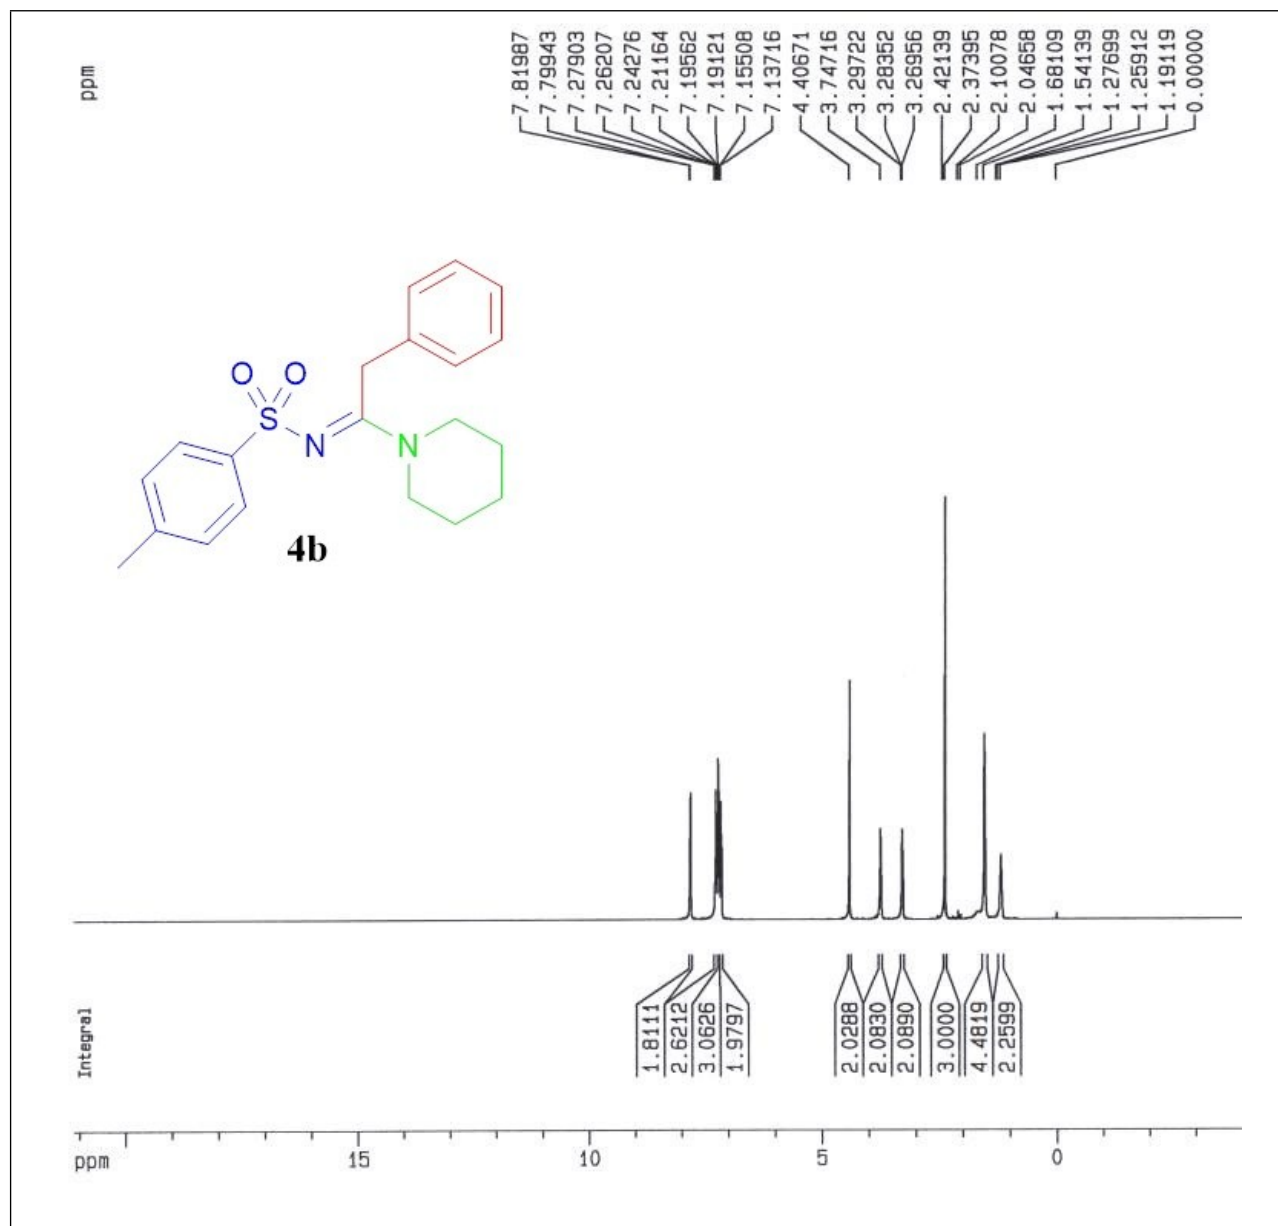

**Figure 5:**  $^1\text{H}$  NMR spectrum (400 MHz) of compound **4b** in  $\text{CDCl}_3$ .

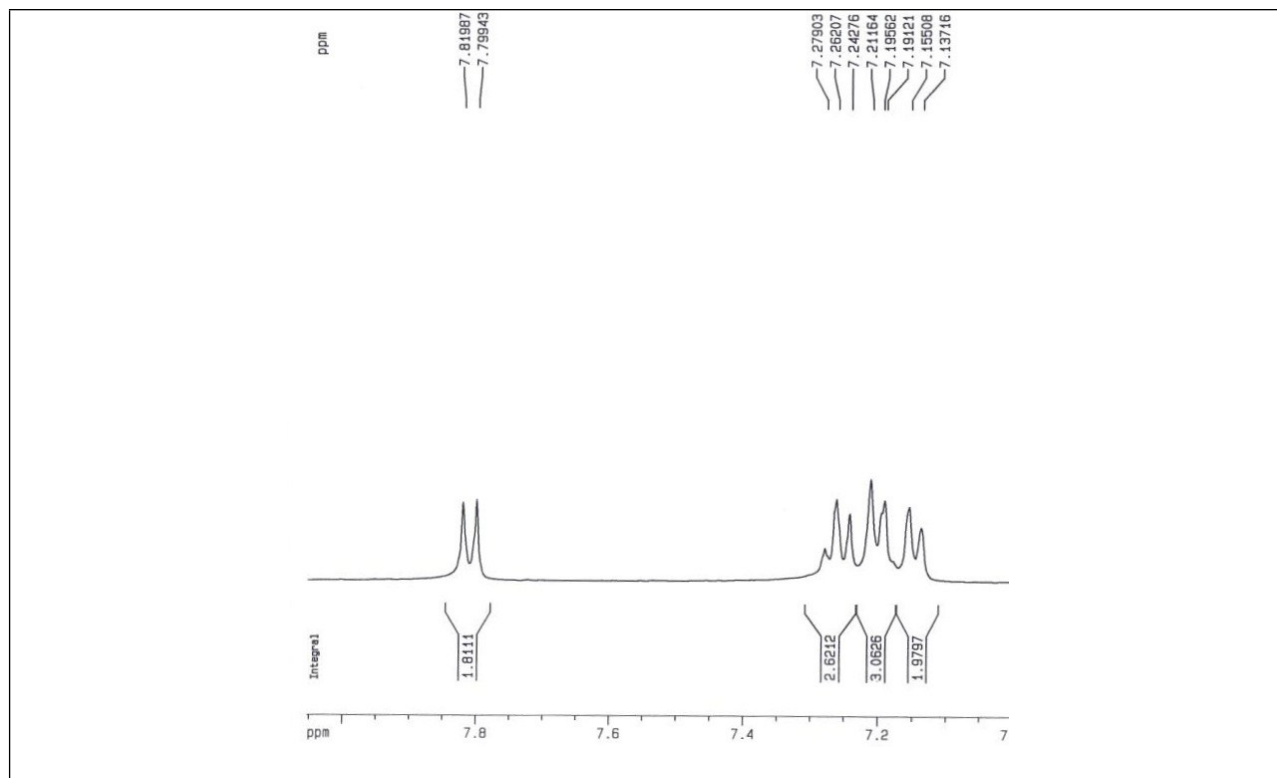

**Figure 6:** Expanded (1)  $^1\text{H}$  NMR spectrum (400 MHz) of compound **4b** in  $\text{CDCl}_3$ .

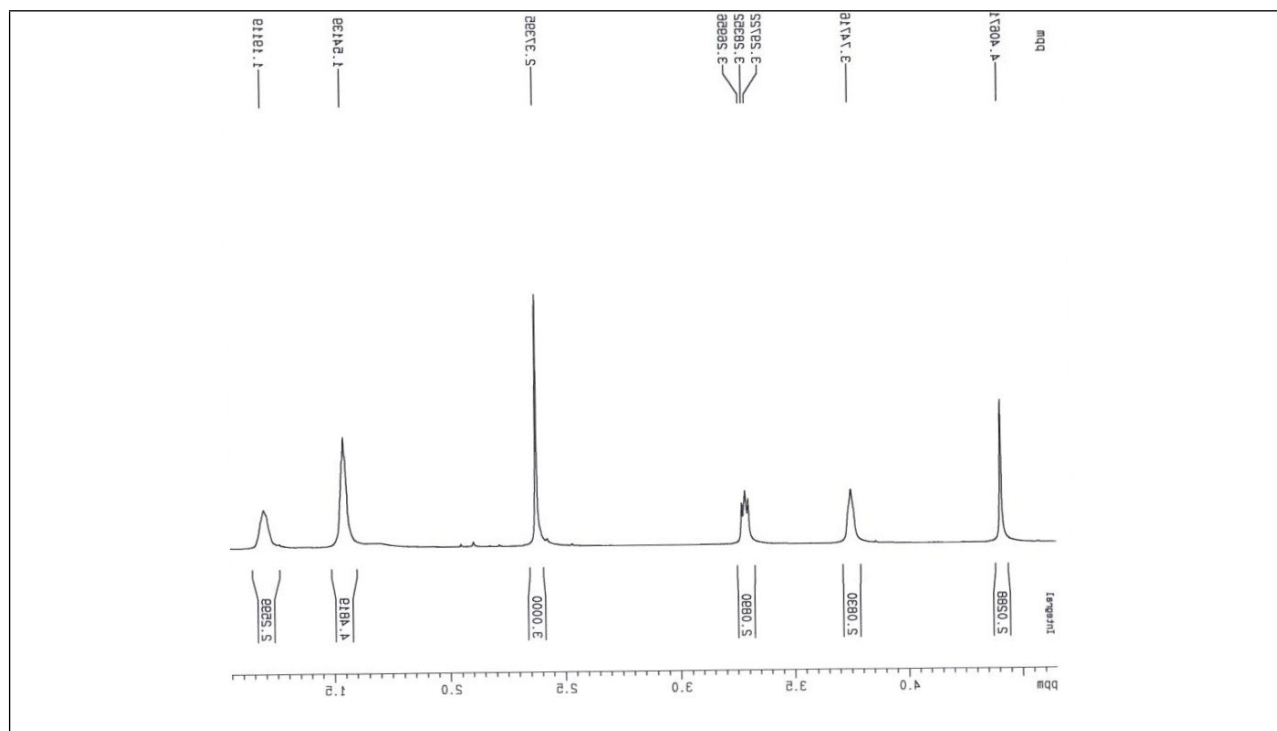

**Figure 7:** Expanded (2)  $^1\text{H}$  NMR spectrum (400 MHz) of compound **4b** in  $\text{CDCl}_3$ .

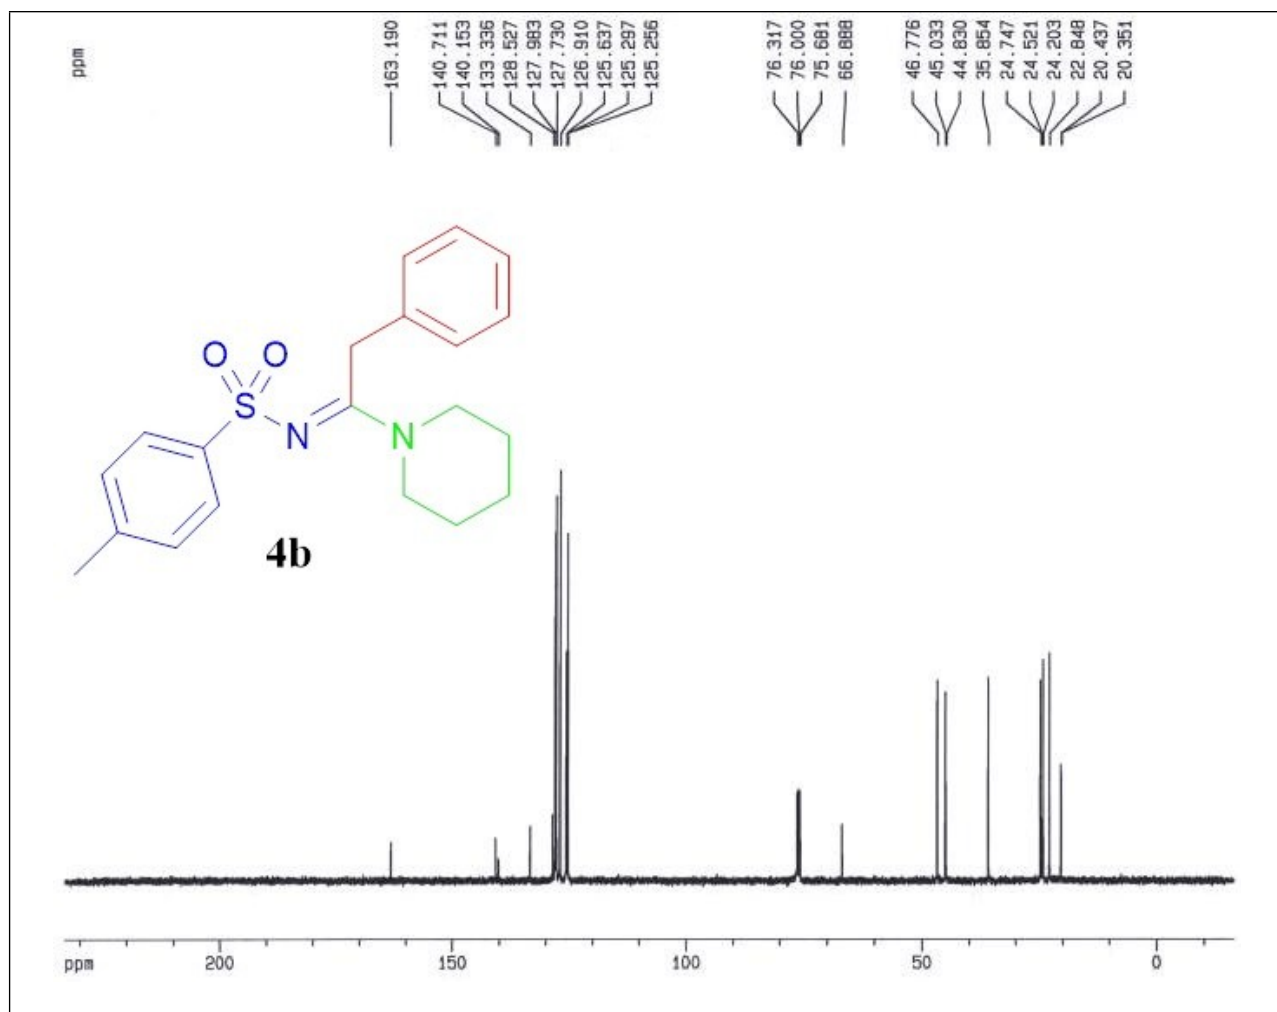

**Figure 8:**  $^{13}\text{C}$  NMR spectrum (100 MHz) of compound **4b** in  $\text{CDCl}_3$ .

**4-Methyl-N-[2-phenyl-1-(pyrrolidin-1-yl) ethylidene] benzenesulfonamide (4c):**

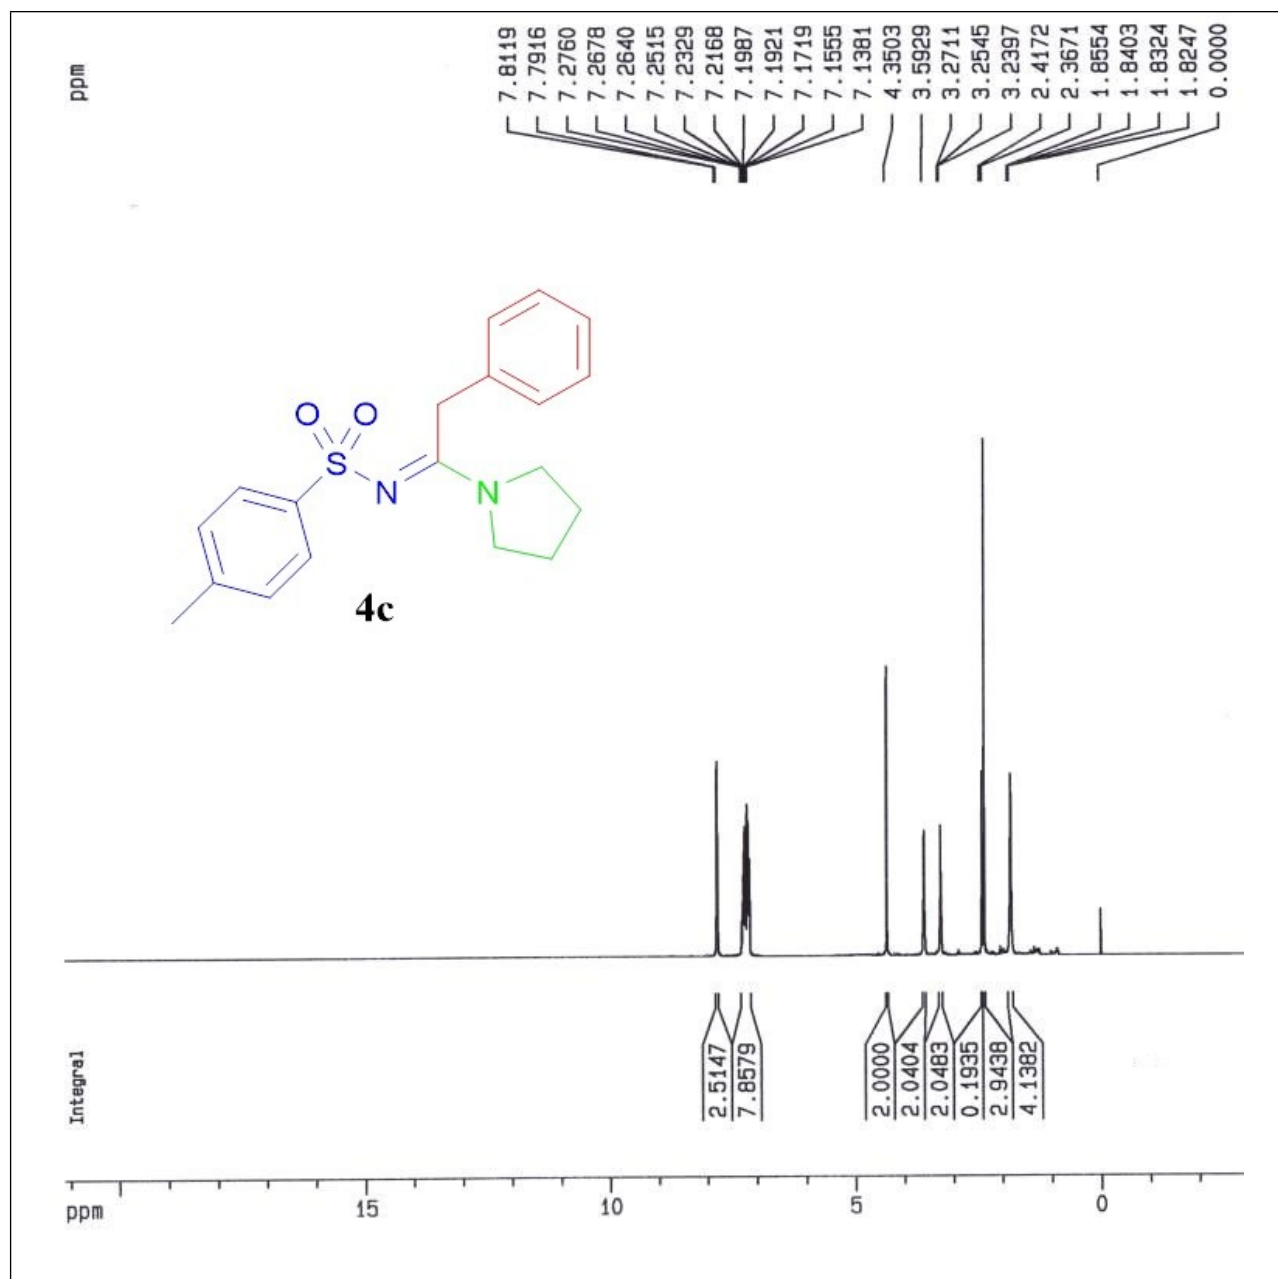

**Figure 9:** <sup>1</sup>H NMR spectrum (400 MHz) of compound **4c** in CDCl<sub>3</sub>.

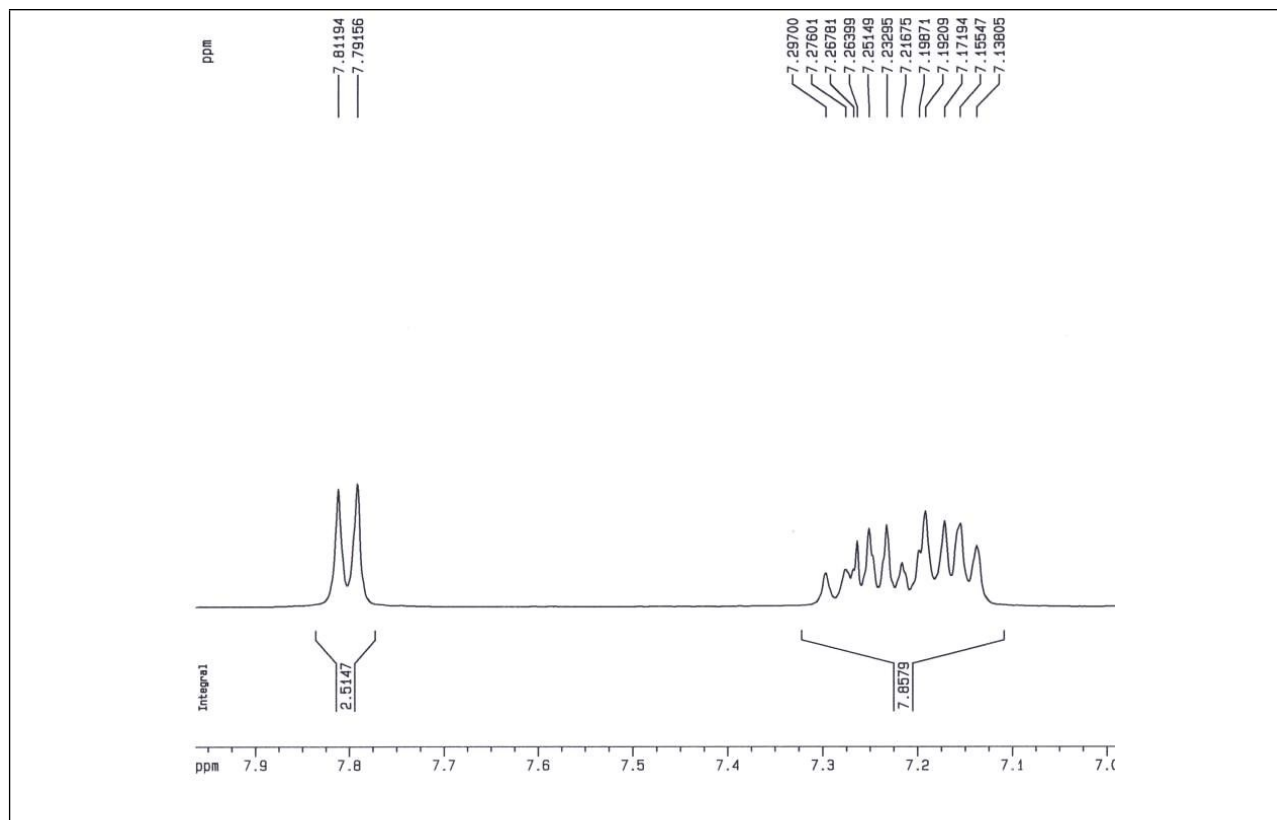

**Figure 10:** Expanded (1)  $^1\text{H}$  NMR spectrum (400 MHz) of compound **4c** in  $\text{CDCl}_3$ .

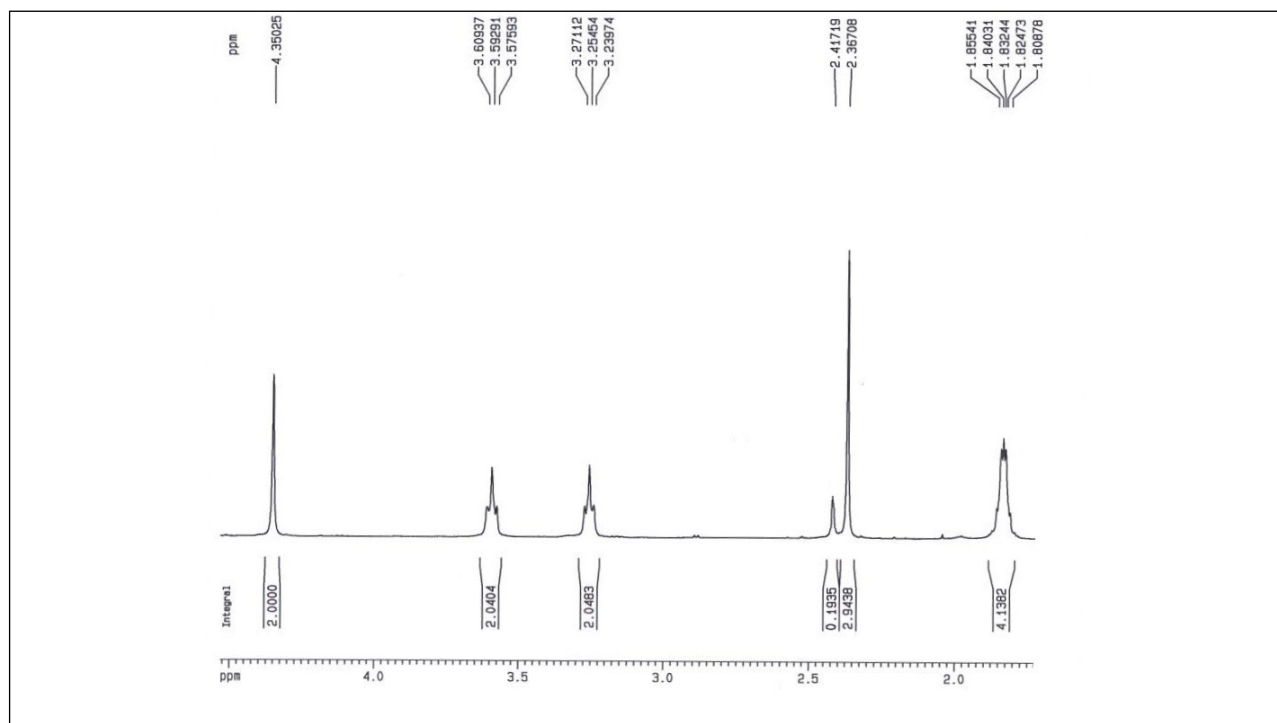

**Figure 11:** Expanded (2)  $^1\text{H}$  NMR spectrum (400 MHz) of compound **4c** in  $\text{CDCl}_3$ .



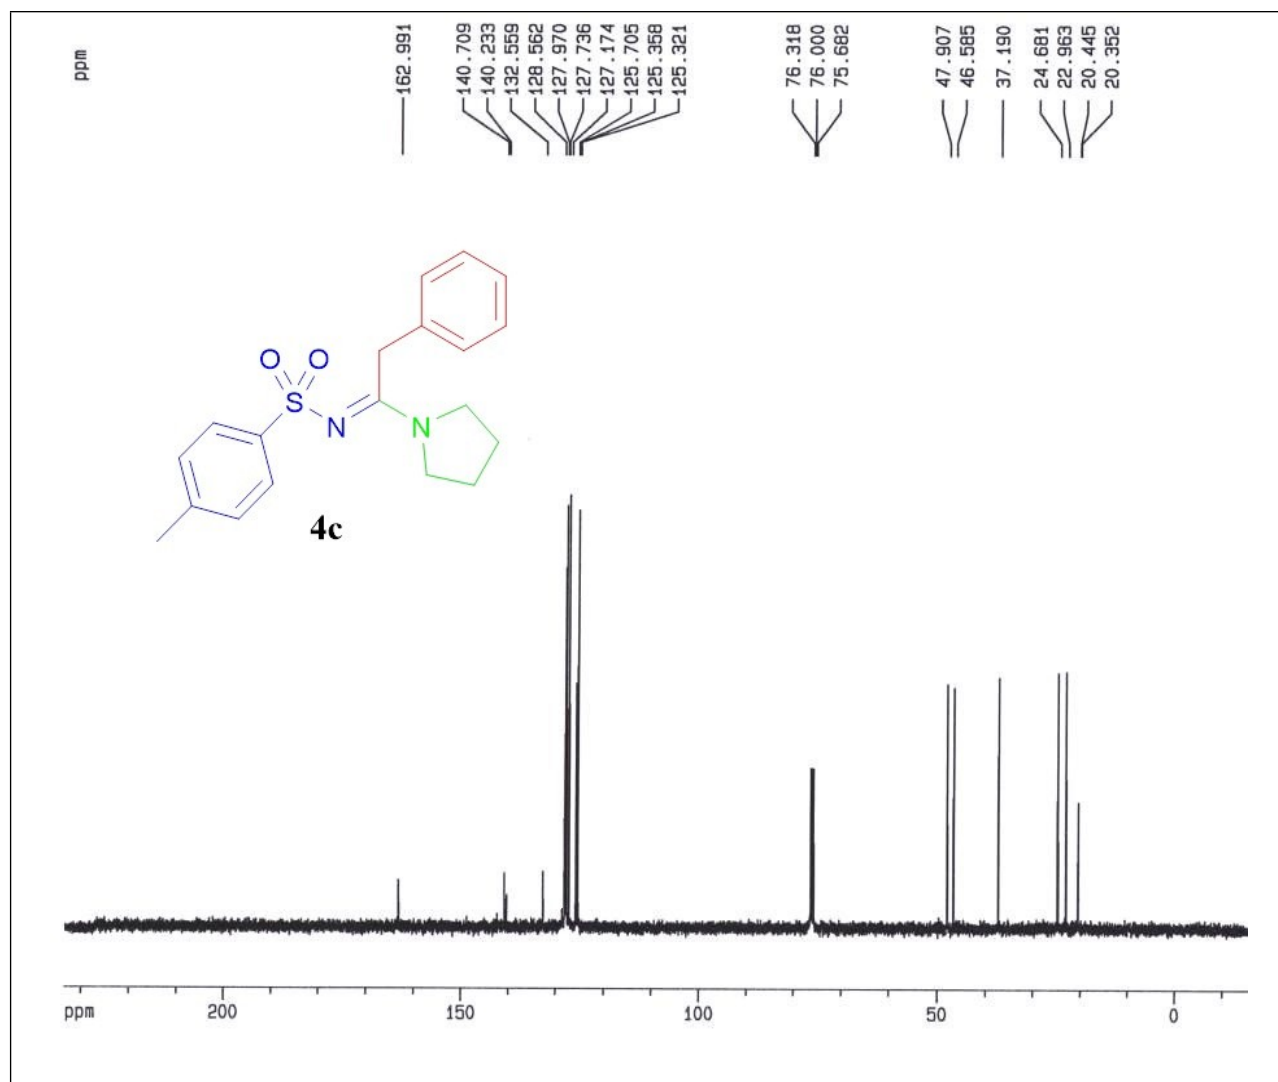

**Figure 12:** <sup>13</sup>C NMR spectrum (100 MHz) of compound **4c** in CDCl<sub>3</sub>.

For previous methods for synthesis of (**4a**, **4b** and **4c**), see reference 1.

**4-Methyl-N-[1-(4-methylpiperazin-1-yl)-2-phenylethylidene] benzenesulfonamide (4d):**

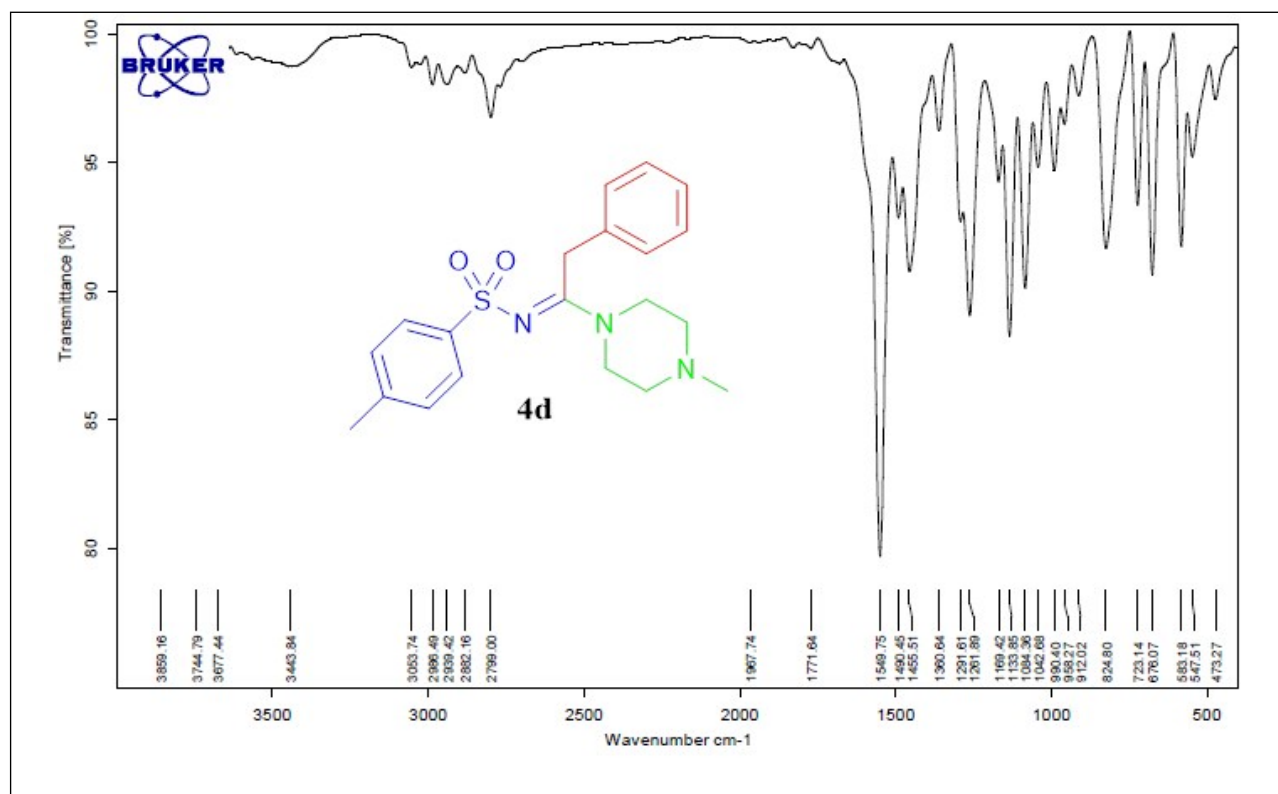

**Figure 13:** FTIR spectrum (KBr) of compound **4d**.

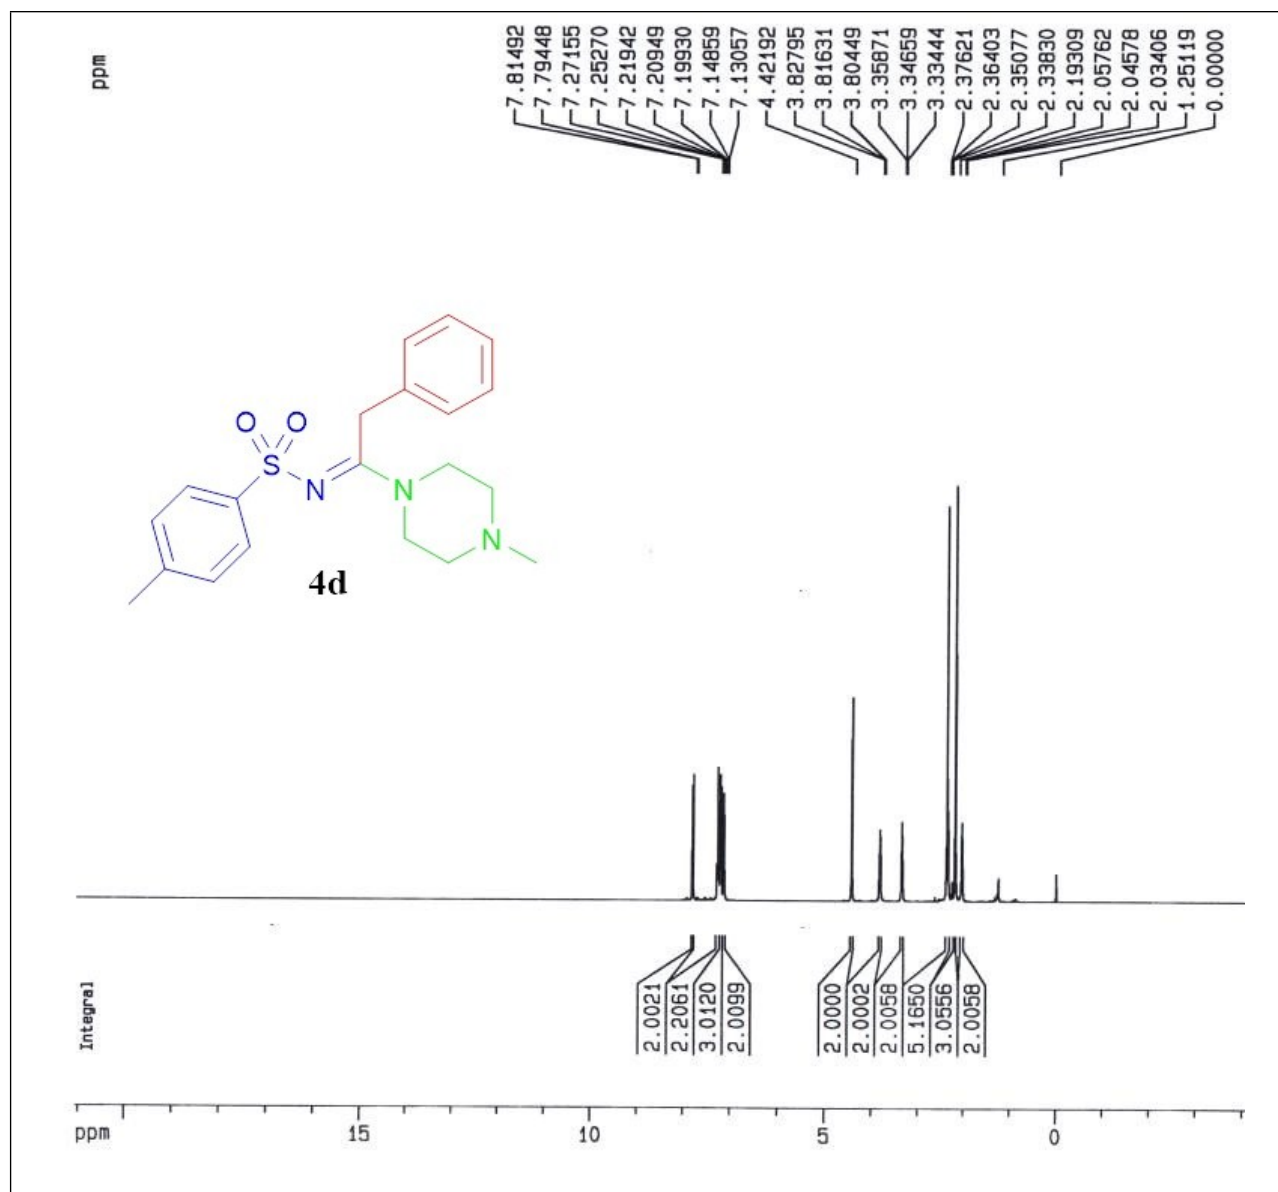

**Figure 14:**  $^1\text{H}$  NMR spectrum (400 MHz) of compound **4d** in  $\text{CDCl}_3$ .

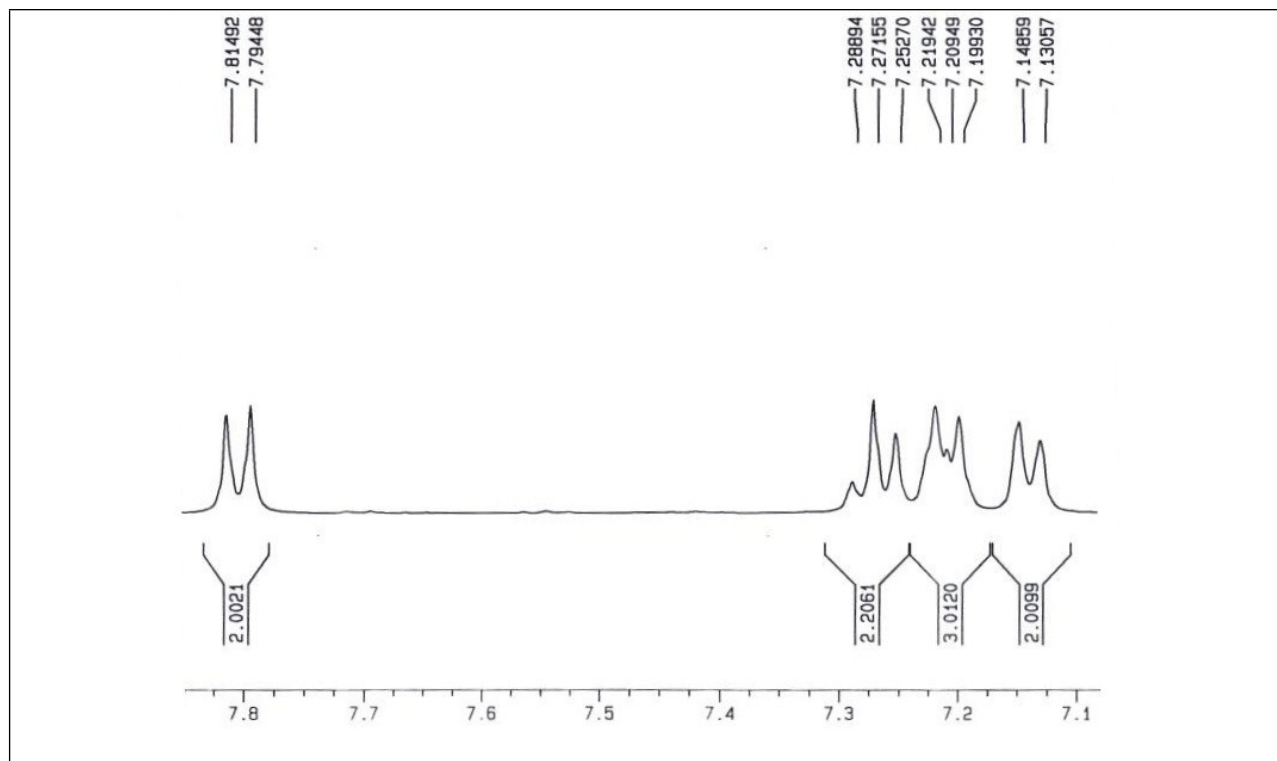

**Figure 15:** Expanded (1)  $^1\text{H}$  NMR spectrum (400 MHz) of compound **4d** in  $\text{CDCl}_3$ .

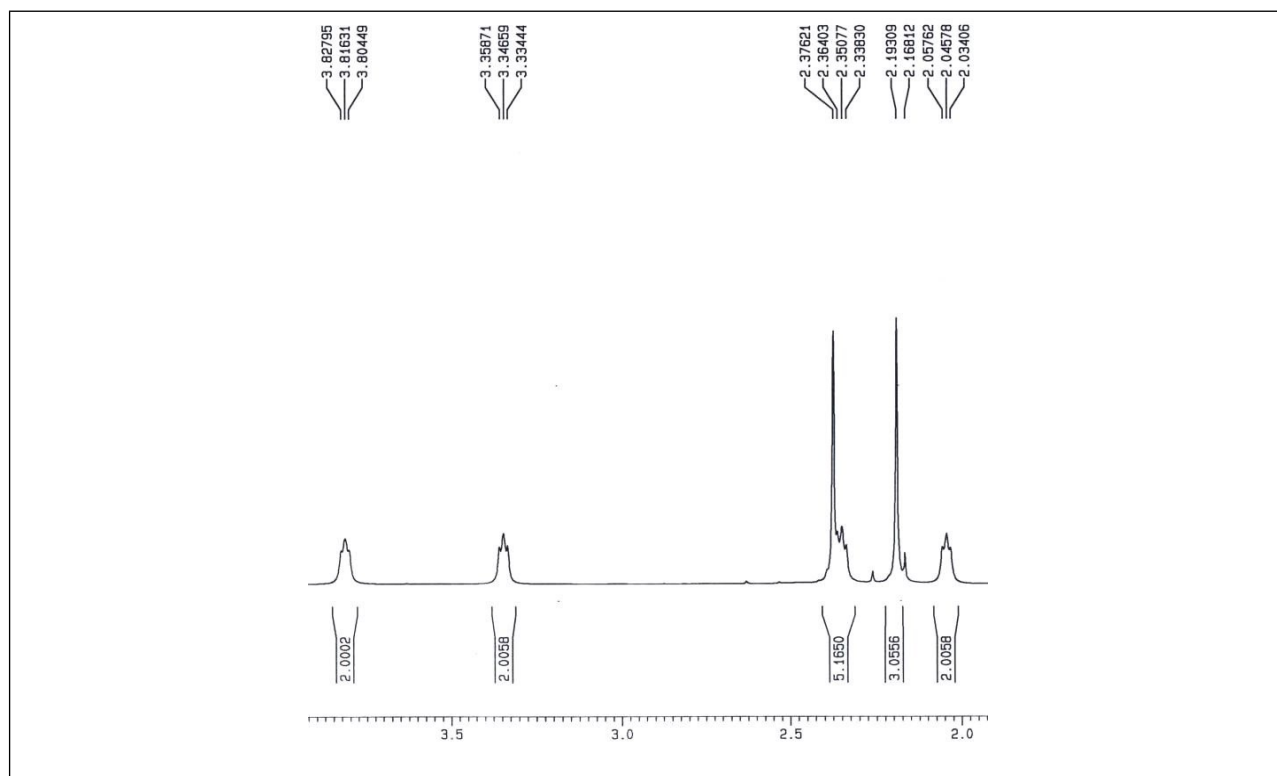

**Figure 16:** Expanded (2)  $^1\text{H}$  NMR spectrum (400 MHz) of compound **4d** in  $\text{CDCl}_3$ .

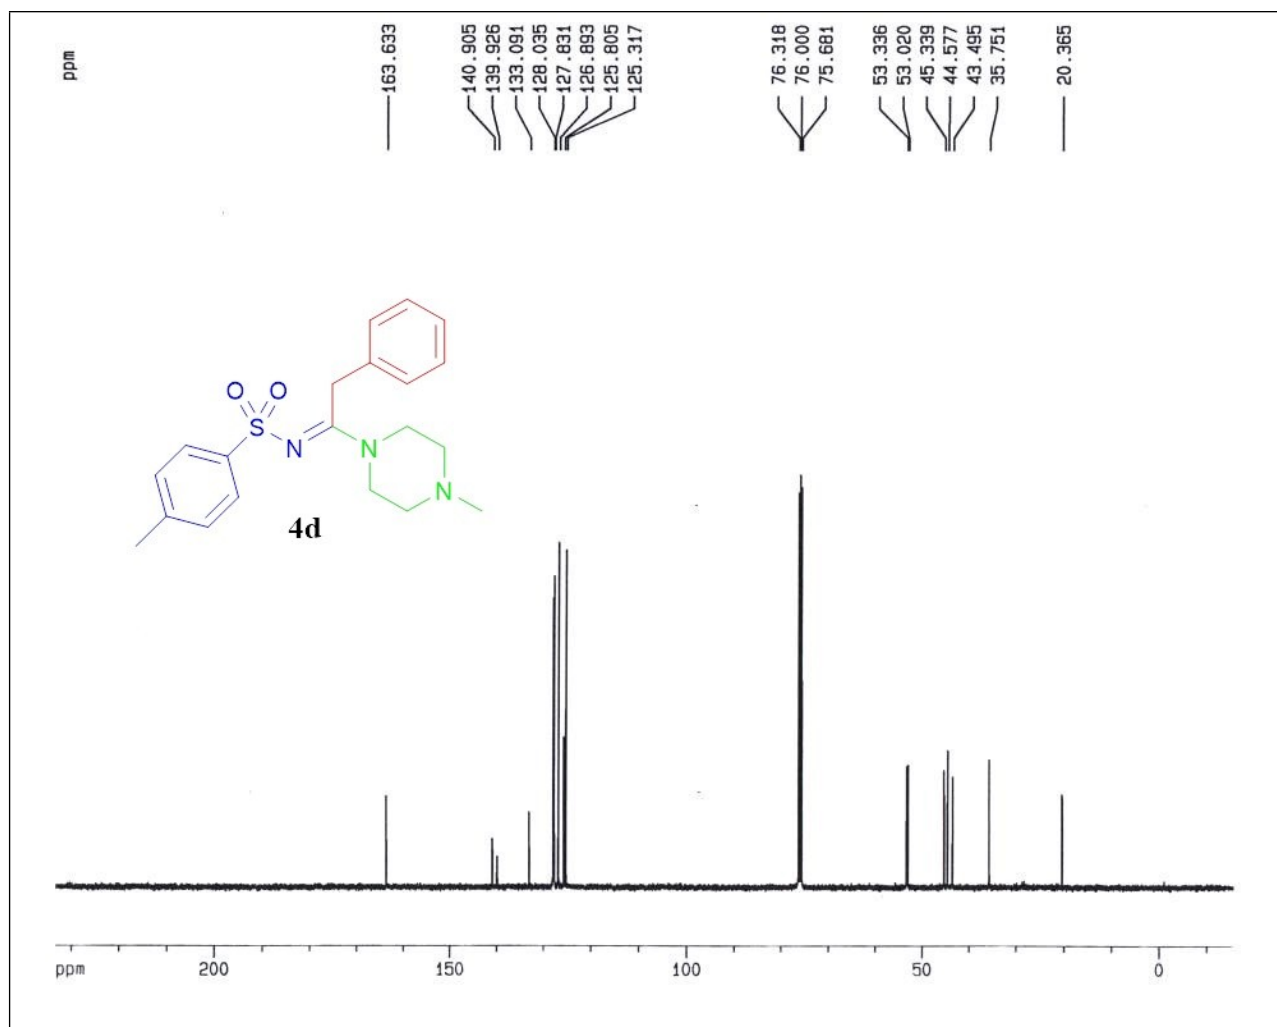

**Figure 17:** <sup>13</sup>C NMR spectrum (100 MHz) of compound **4d** in CDCl<sub>3</sub>.

***N*-[1-(4-Methylpiperazin-1-yl)-2-phenylethylidene] benzenesulfonamide (4e):**

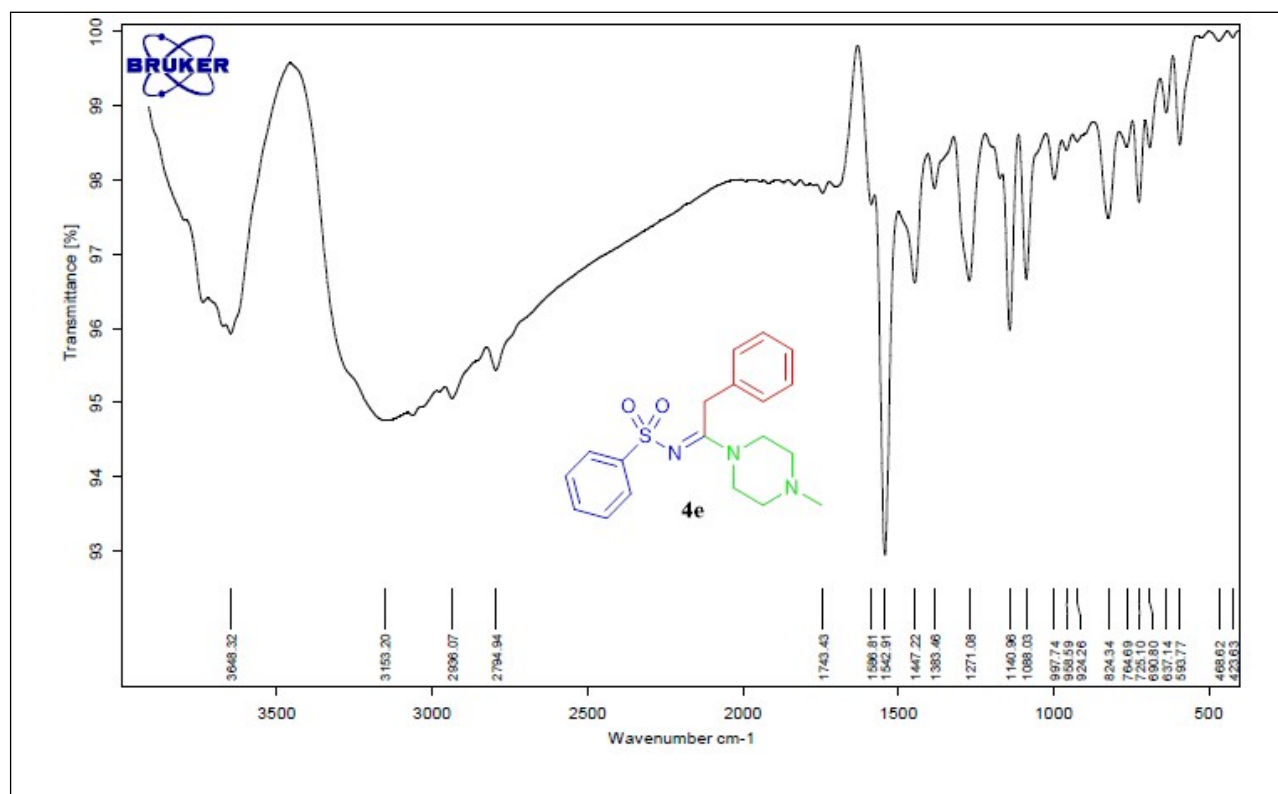

**Figure 18:** FTIR spectrum (KBr) of compound 4e.

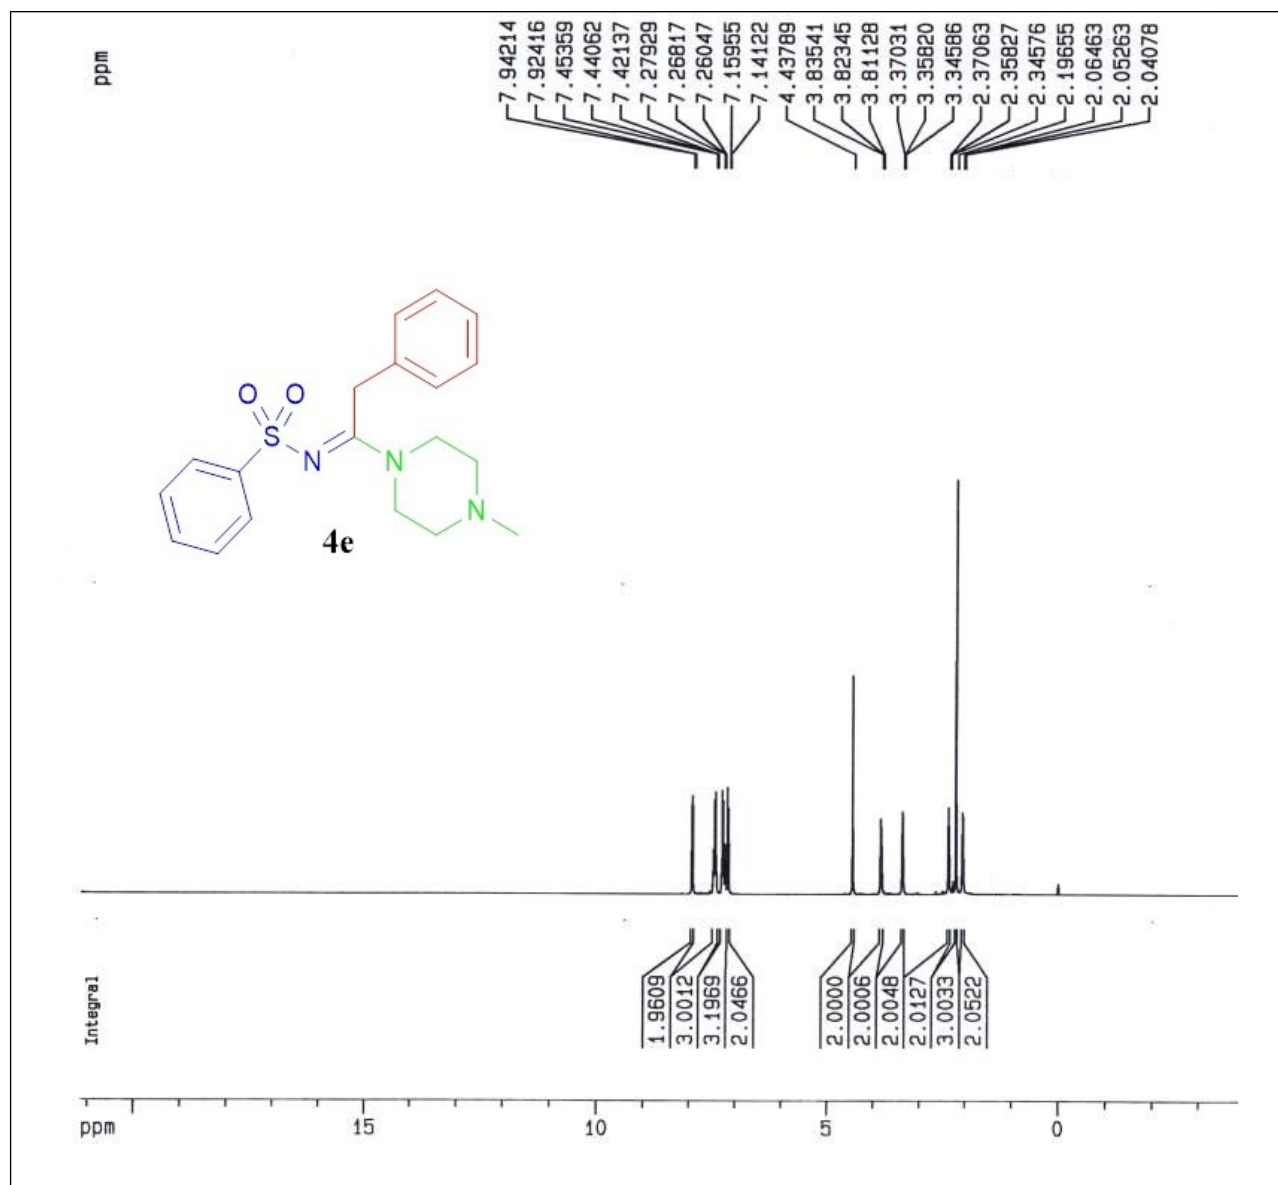

**Figure 19:** <sup>1</sup>H NMR spectrum (400 MHz) of compound **4e** in CDCl<sub>3</sub>.

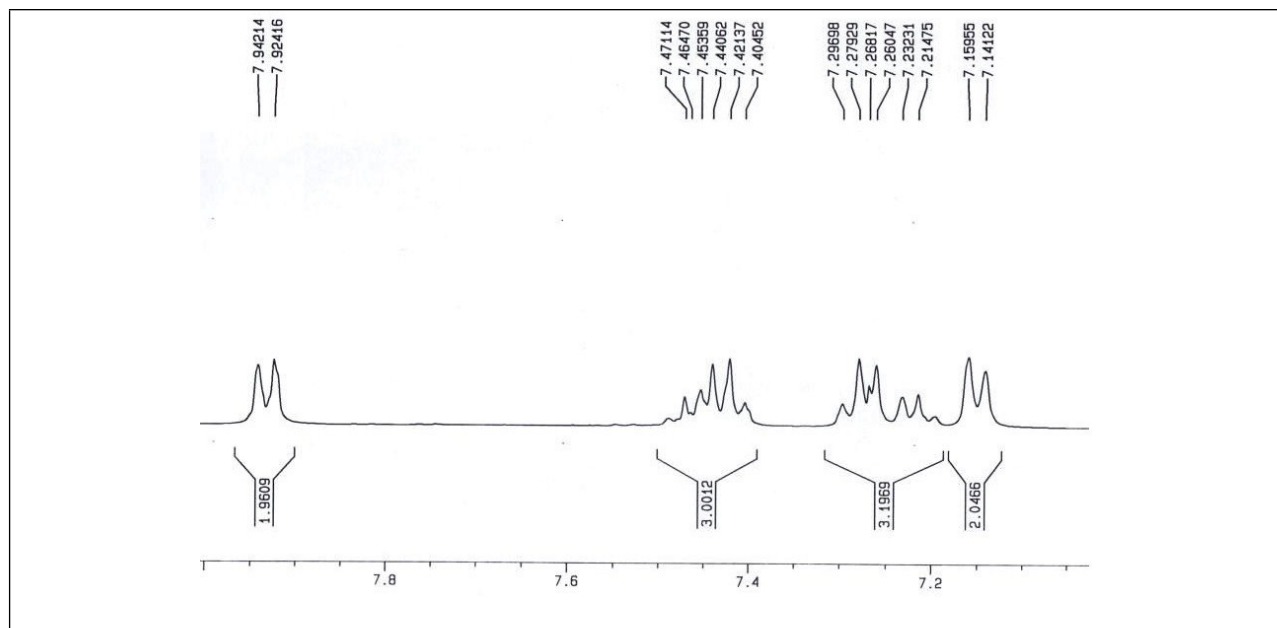

**Figure 20:** Expanded (1)  $^1\text{H}$  NMR spectrum (400 MHz) of compound **4e** in  $\text{CDCl}_3$ .

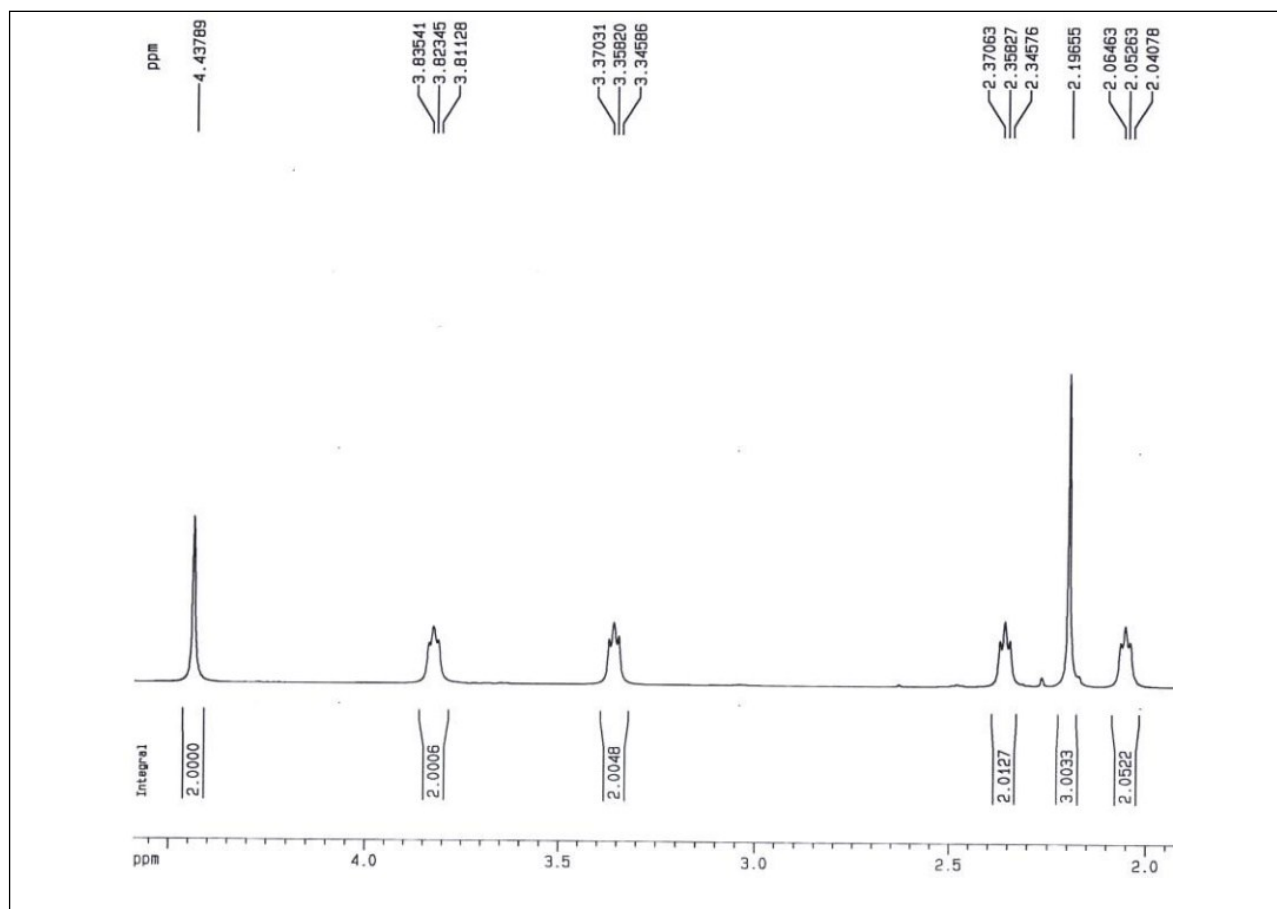

**Figure 21:** Expanded (2)  $^1\text{H}$  NMR spectrum (400 MHz) of compound **4e** in  $\text{CDCl}_3$ .



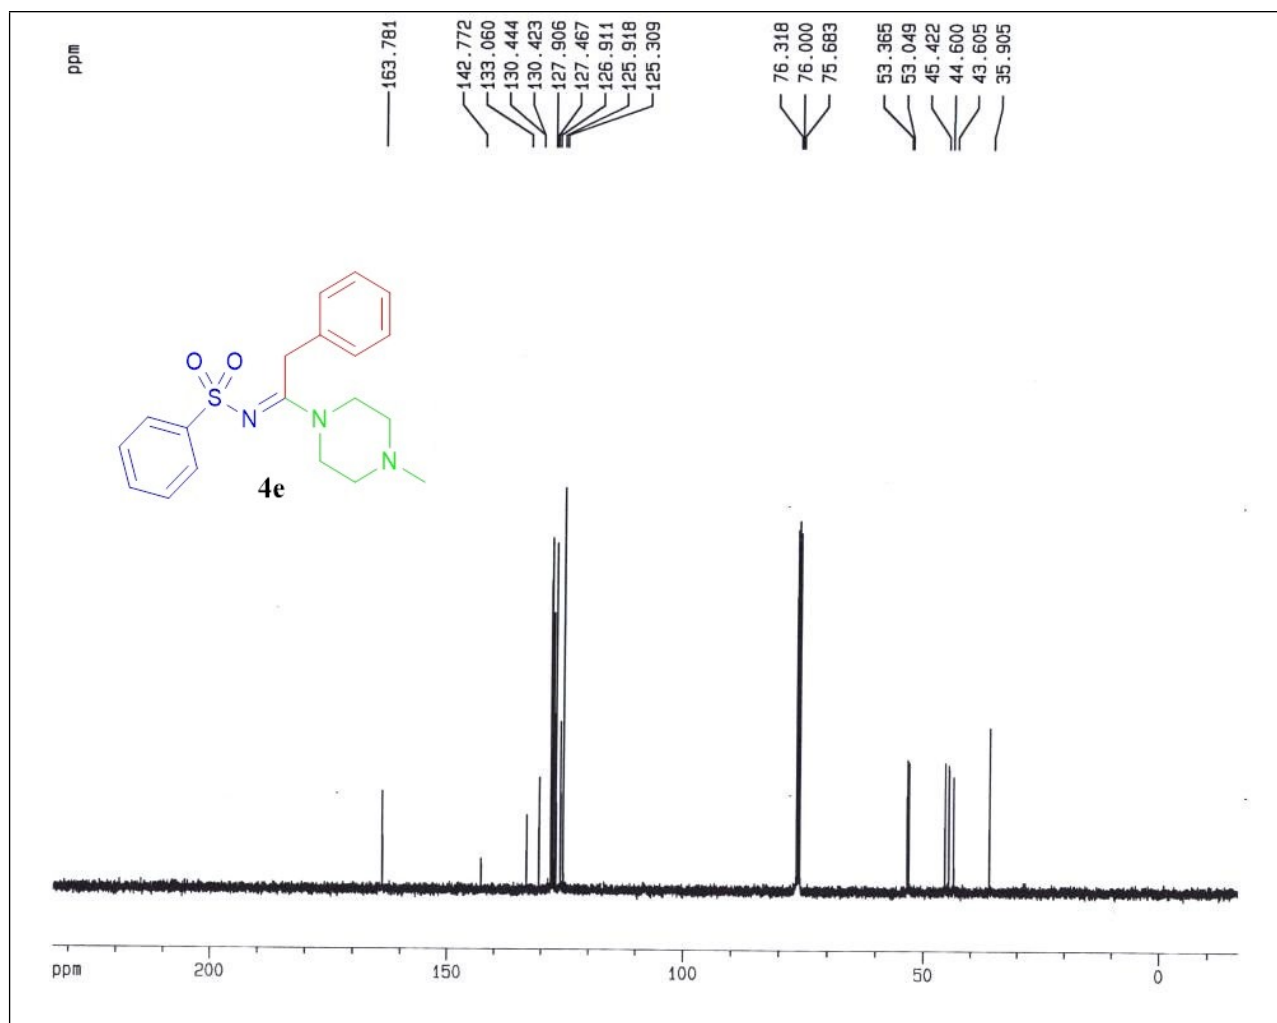

**Figure 22:** <sup>13</sup>C NMR spectrum (100 MHz) of compound **4e** in CDCl<sub>3</sub>.

***N*-[2-phenyl-1-[4-(phenylsulfonyl) piperazin-1-yl] ethylidene] benzenesulfonamide (4f):**

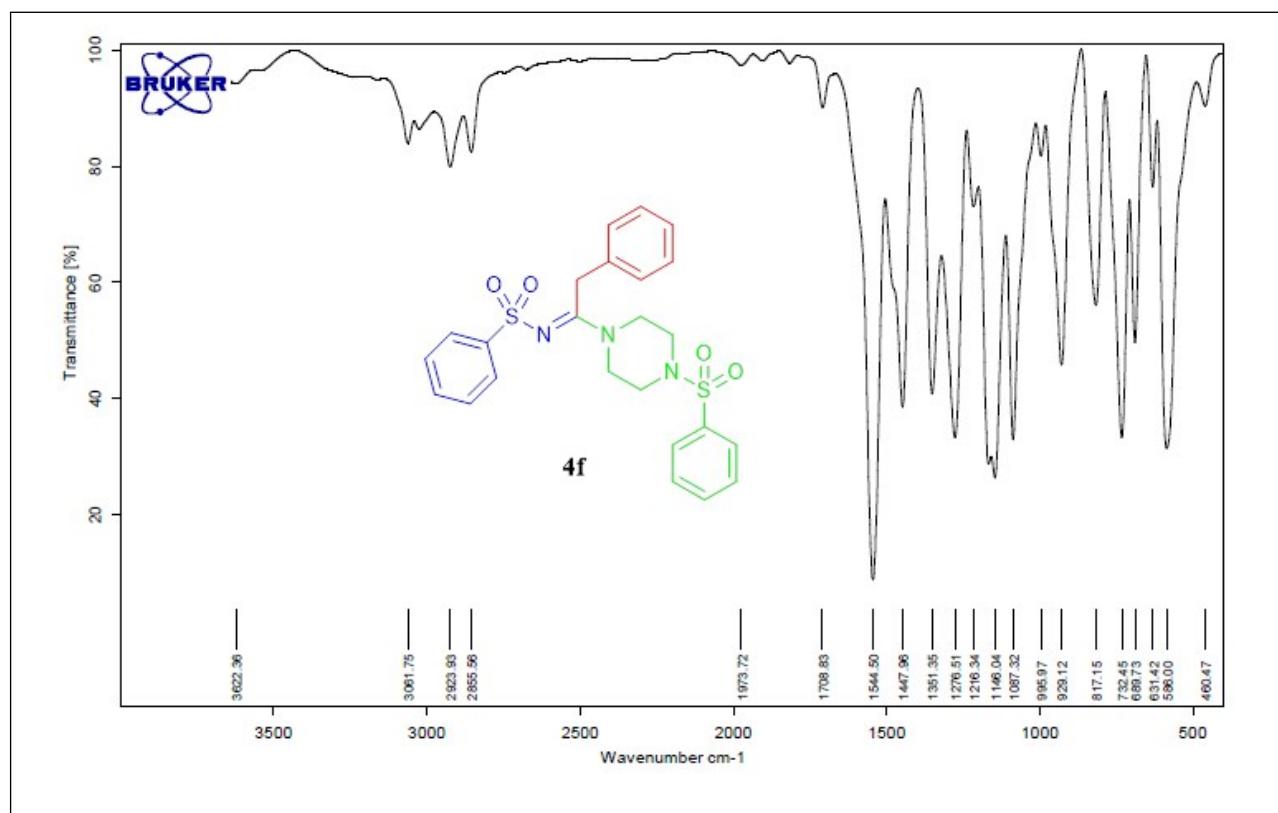

**Figure 23:** FTIR spectrum (KBr) of compound **4f**.

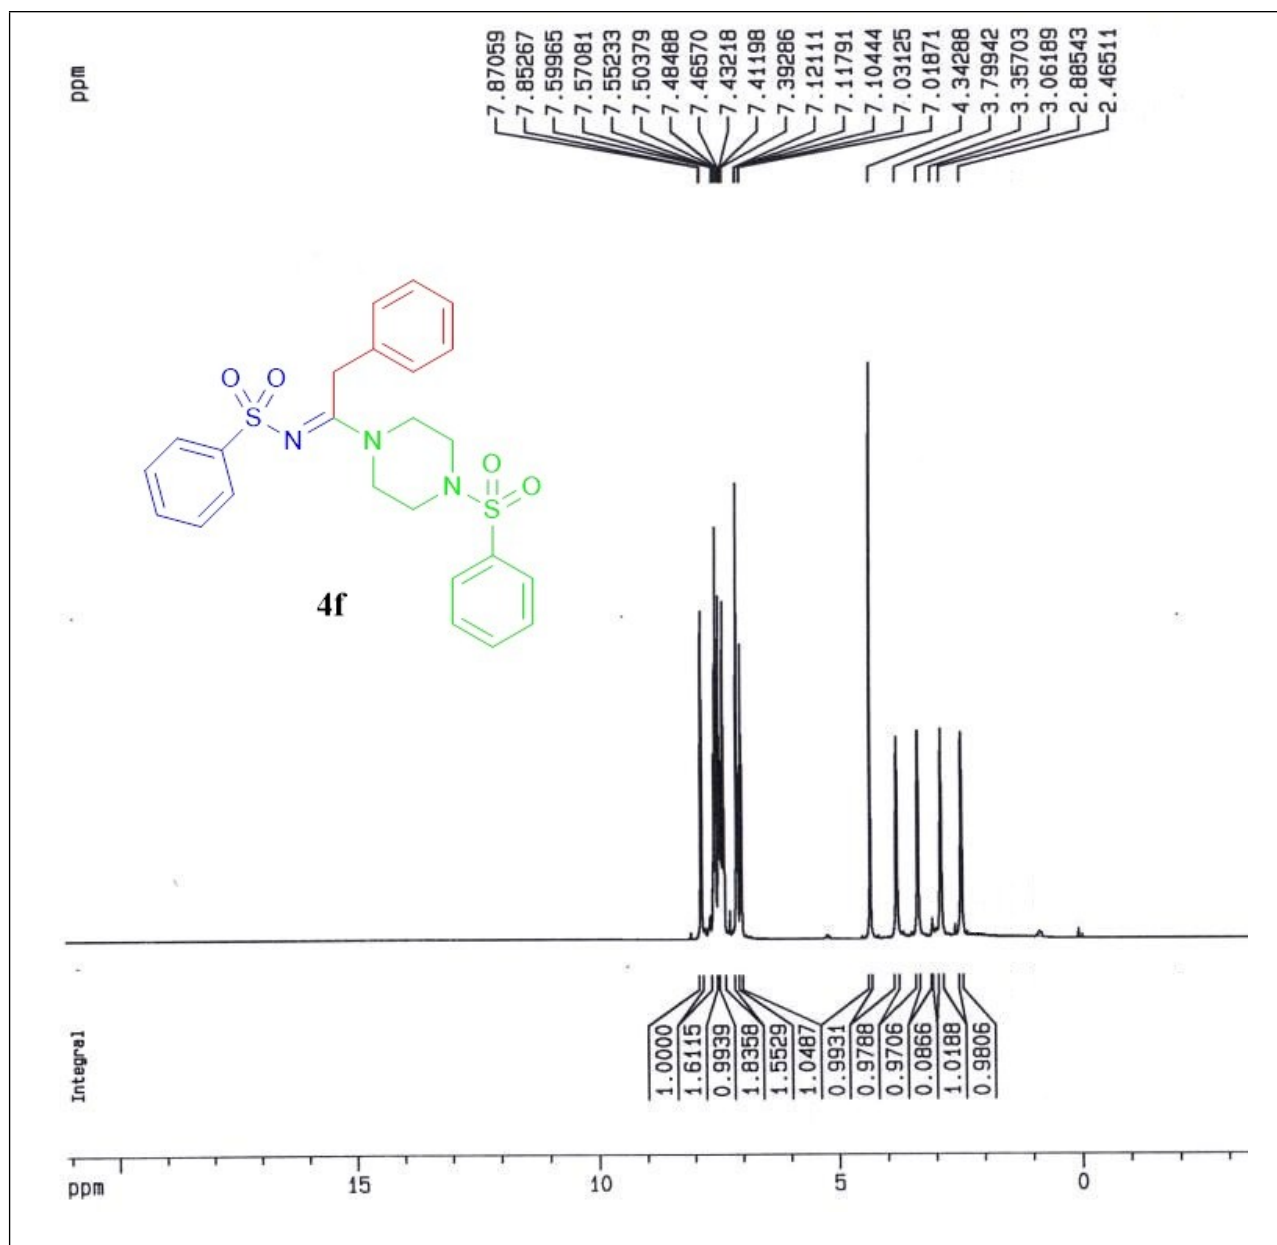

Figure 24: <sup>1</sup>H NMR spectrum (400 MHz) of compound **4f** in CDCl<sub>3</sub>.

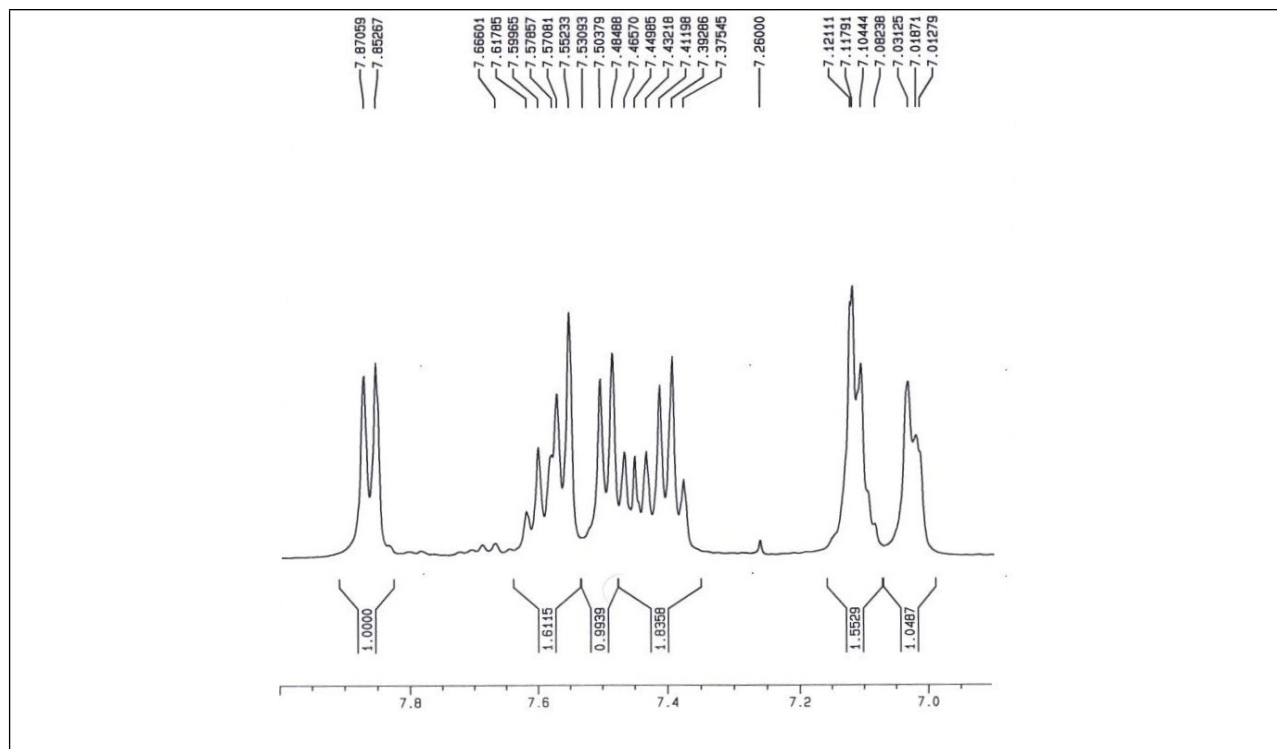

Figure 25: Expanded (1)  $^1\text{H}$  NMR spectrum (400 MHz) of compound **4f** in  $\text{CDCl}_3$ .

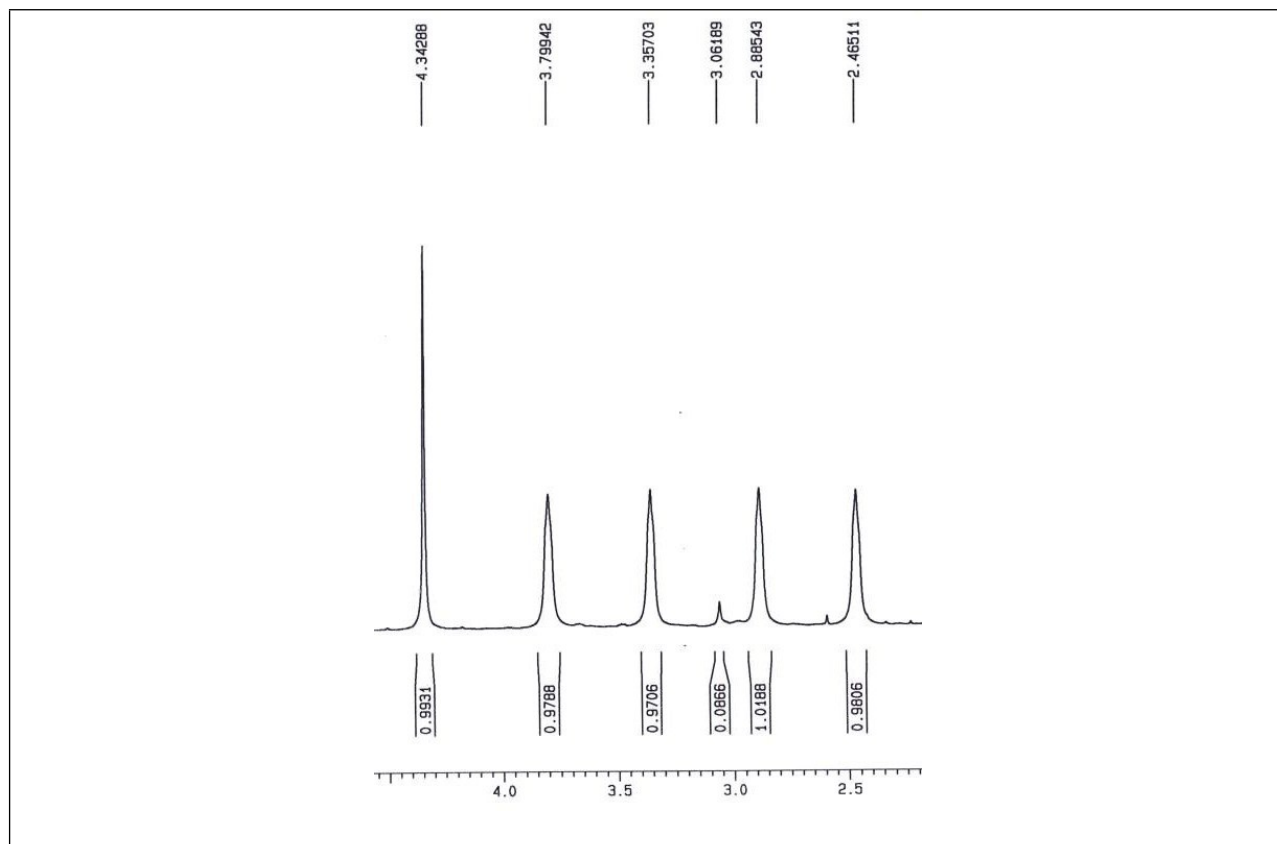

Figure 26: Expanded (2)  $^1\text{H}$  NMR spectrum (400 MHz) of compound **4f** in  $\text{CDCl}_3$ .

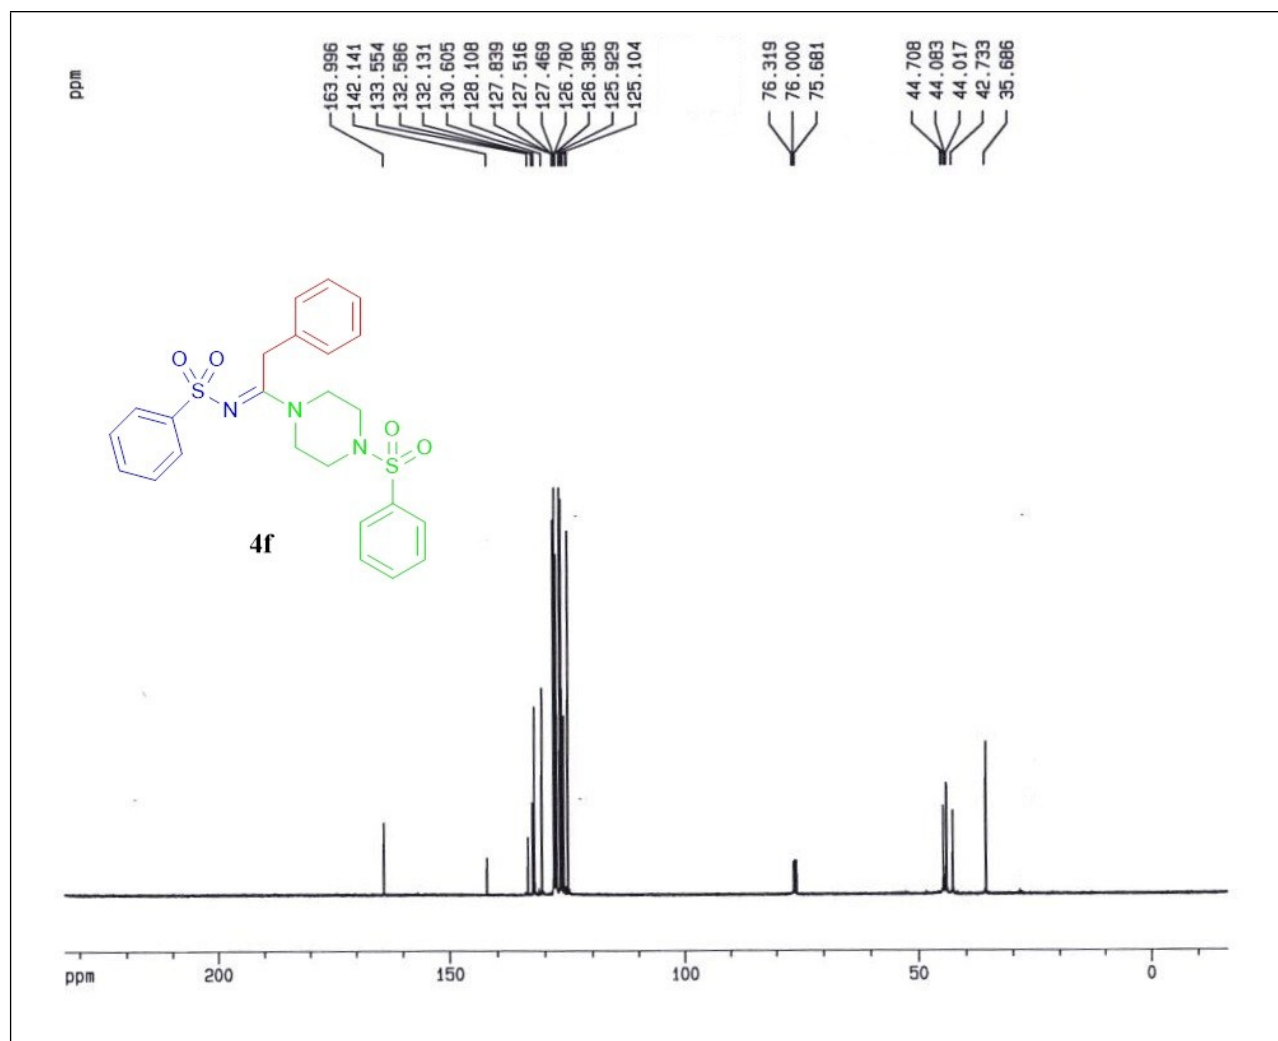

**Figure 27:** <sup>13</sup>C NMR spectrum (100 MHz) of compound **4f** in CDCl<sub>3</sub>.

*N*<sup>1</sup>-Cyclohexyl- *N*<sup>1</sup>-methyl-*N*<sup>2</sup>-(4-methylbenzenesulfonyl)-2-phenylacetamide (**4g**):

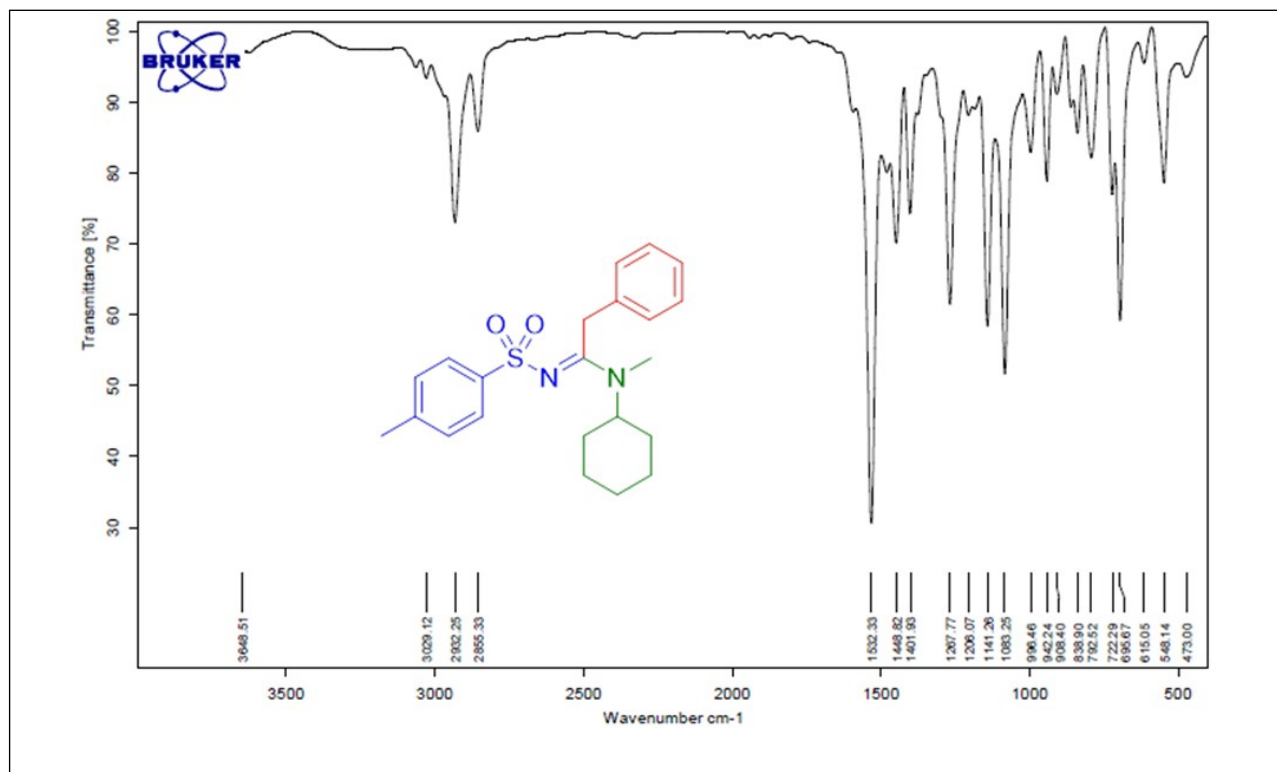

**Figure 28:** FTIR spectrum (KBr) of compound **4g**.

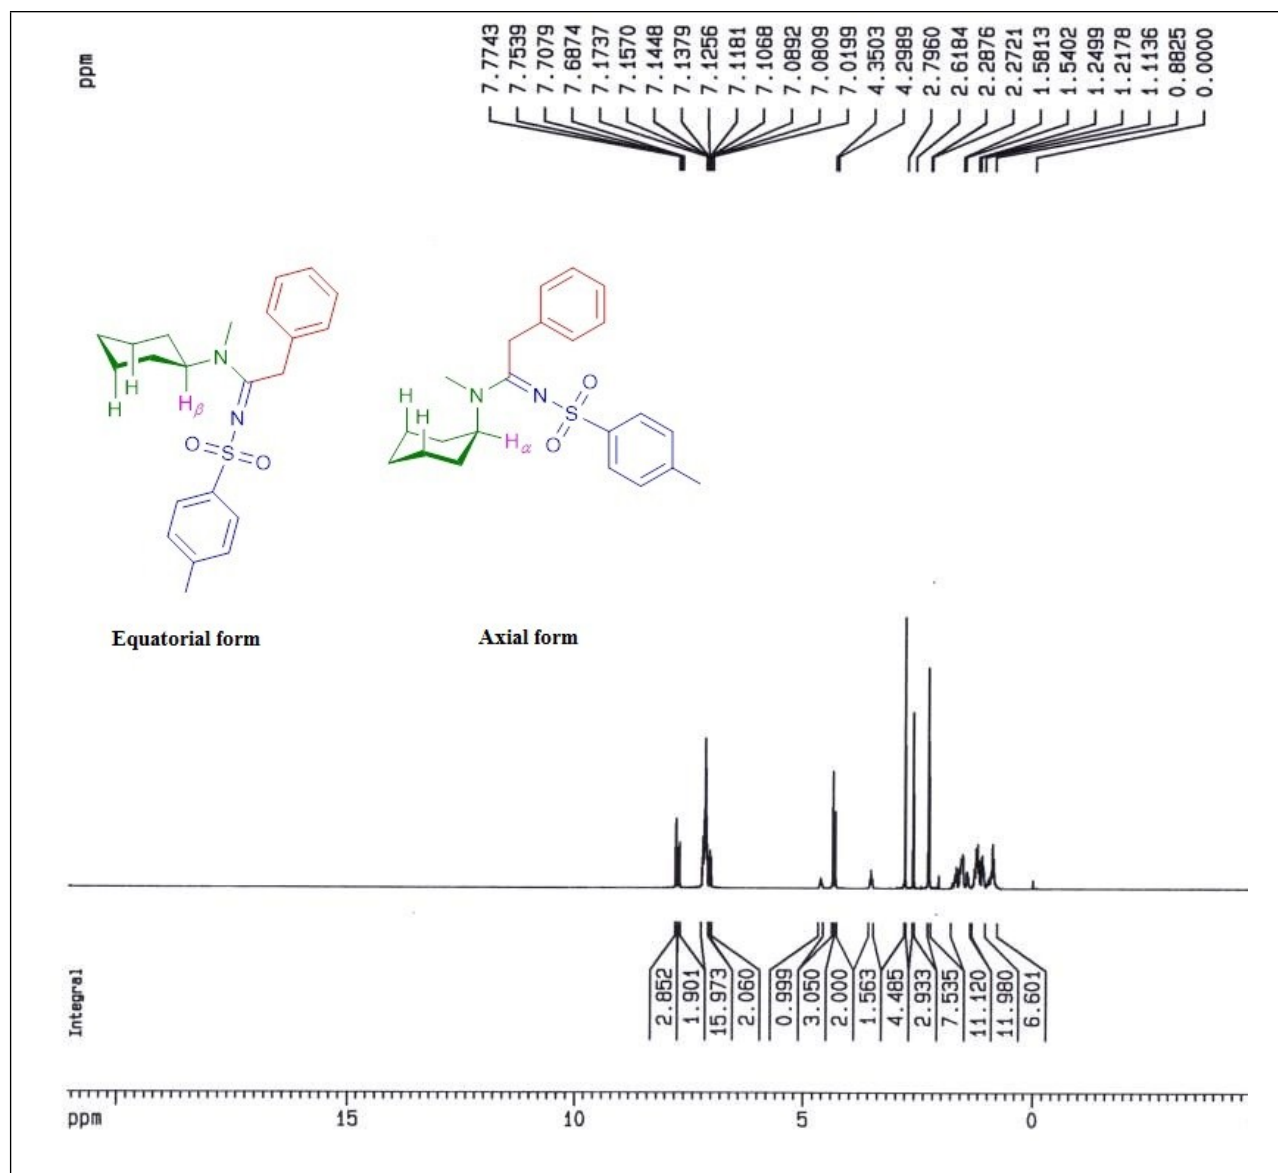

**Figure 29:**  $^1\text{H}$  NMR spectrum (400 MHz) of compound **4g** in  $\text{CDCl}_3$ .

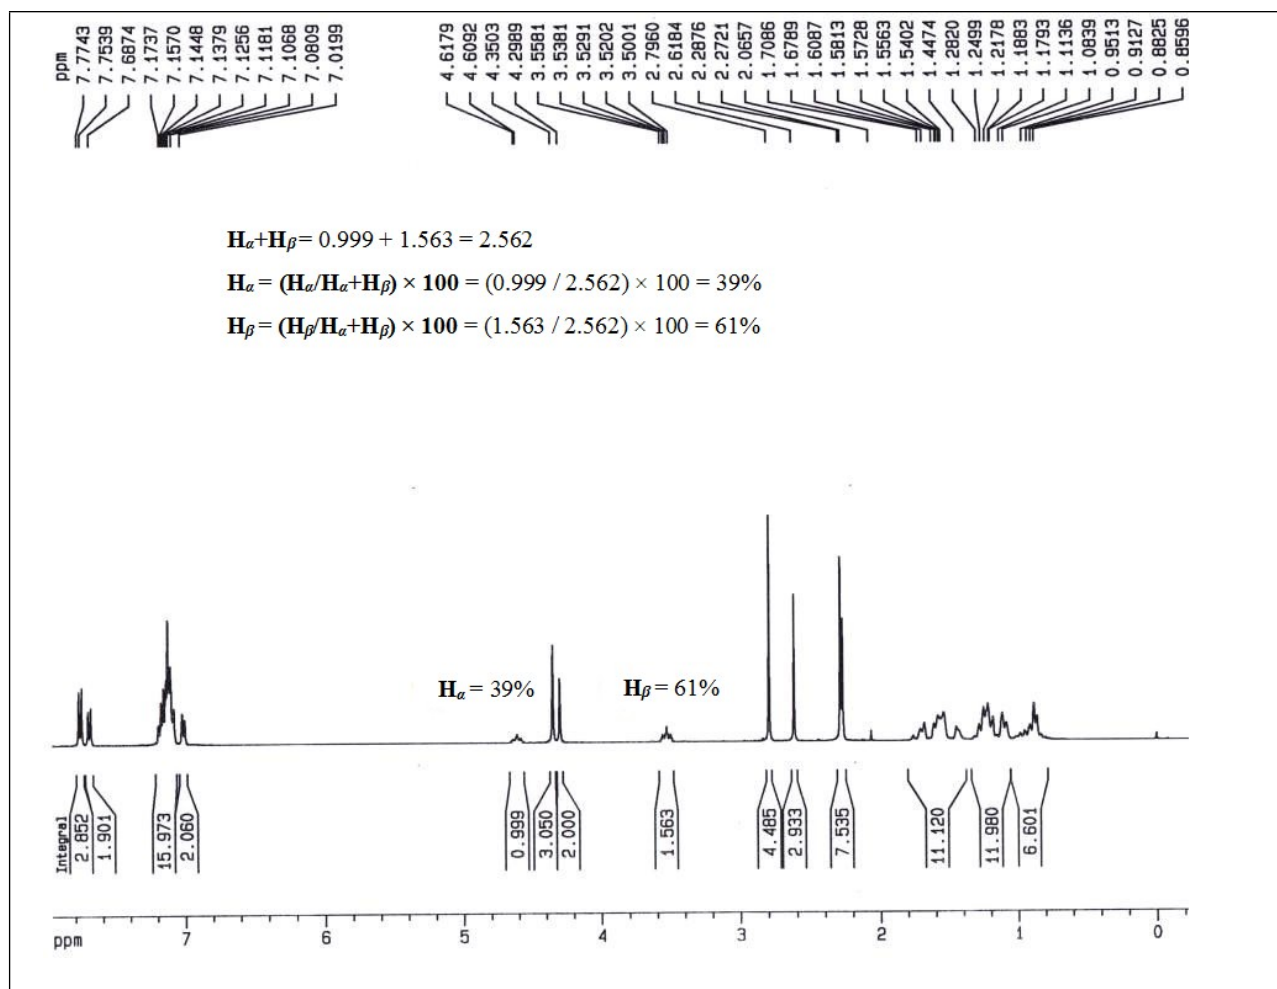

**Figure 30:** Expanded ( $^1\text{H}$ ) NMR spectrum (400 MHz) of compound **4g** in  $\text{CDCl}_3$ .



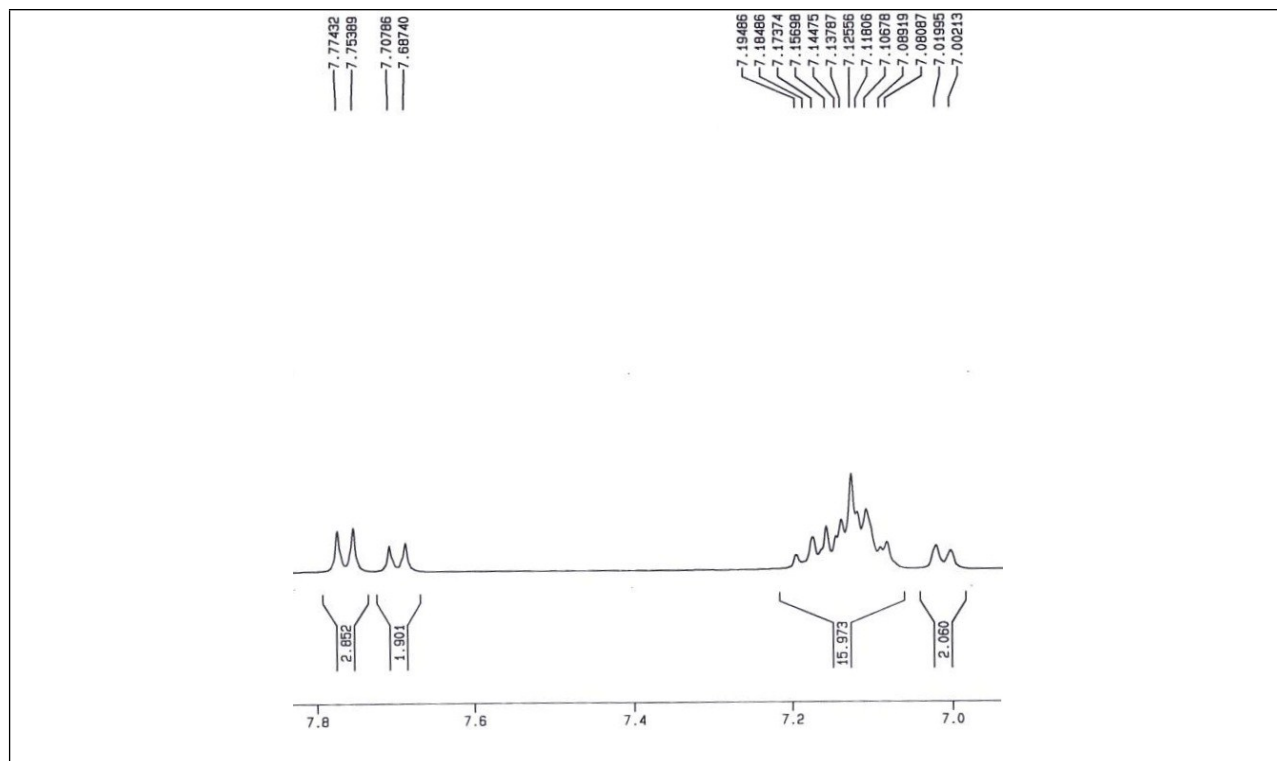

**Figure 31:** Expanded (2)  $^1\text{H}$  NMR spectrum (400 MHz) of compound **4g** in  $\text{CDCl}_3$ .

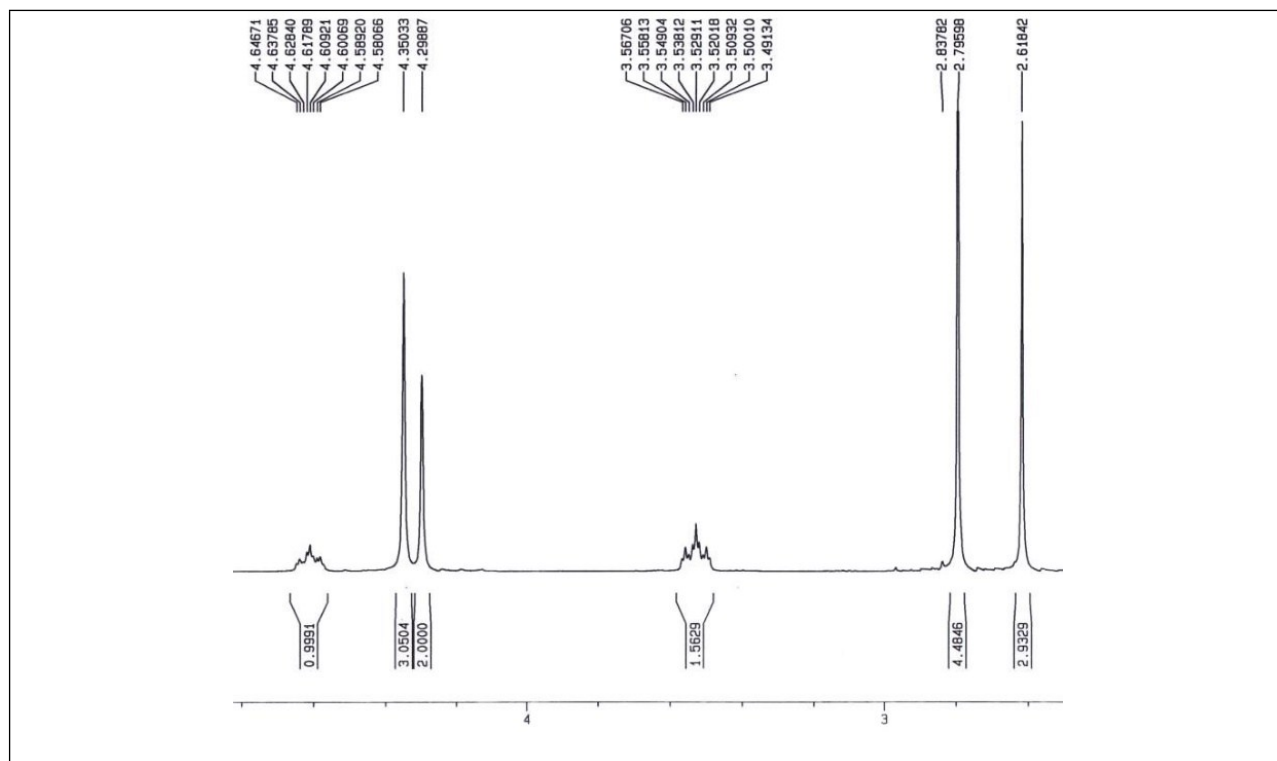

**Figure 32:** Expanded (3)  $^1\text{H}$  NMR spectrum (400 MHz) of compound **4g** in  $\text{CDCl}_3$ .

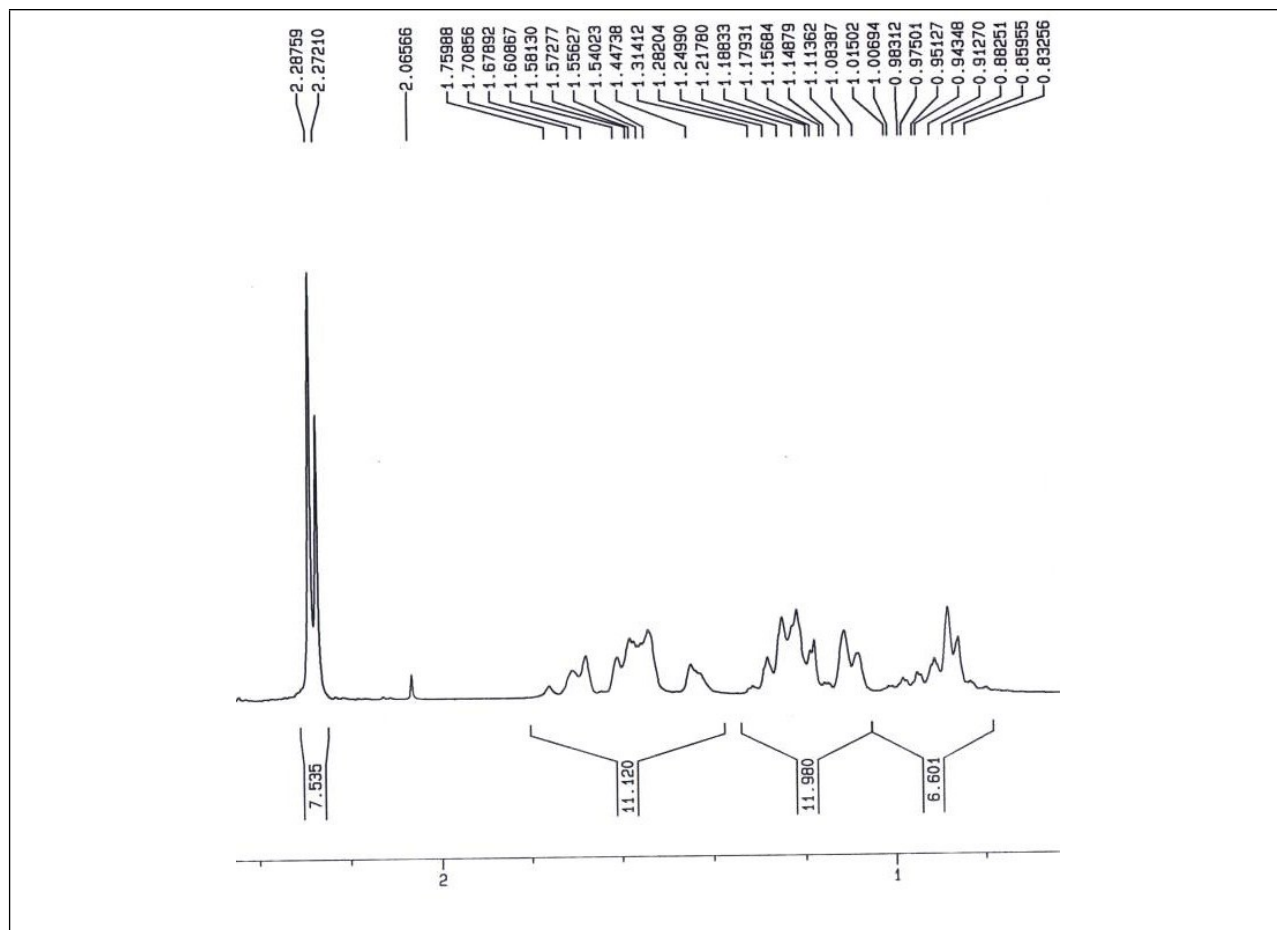

**Figure 33:** Expanded (4)  $^1\text{H}$  NMR spectrum (400 MHz) of compound **4g** in  $\text{CDCl}_3$ .

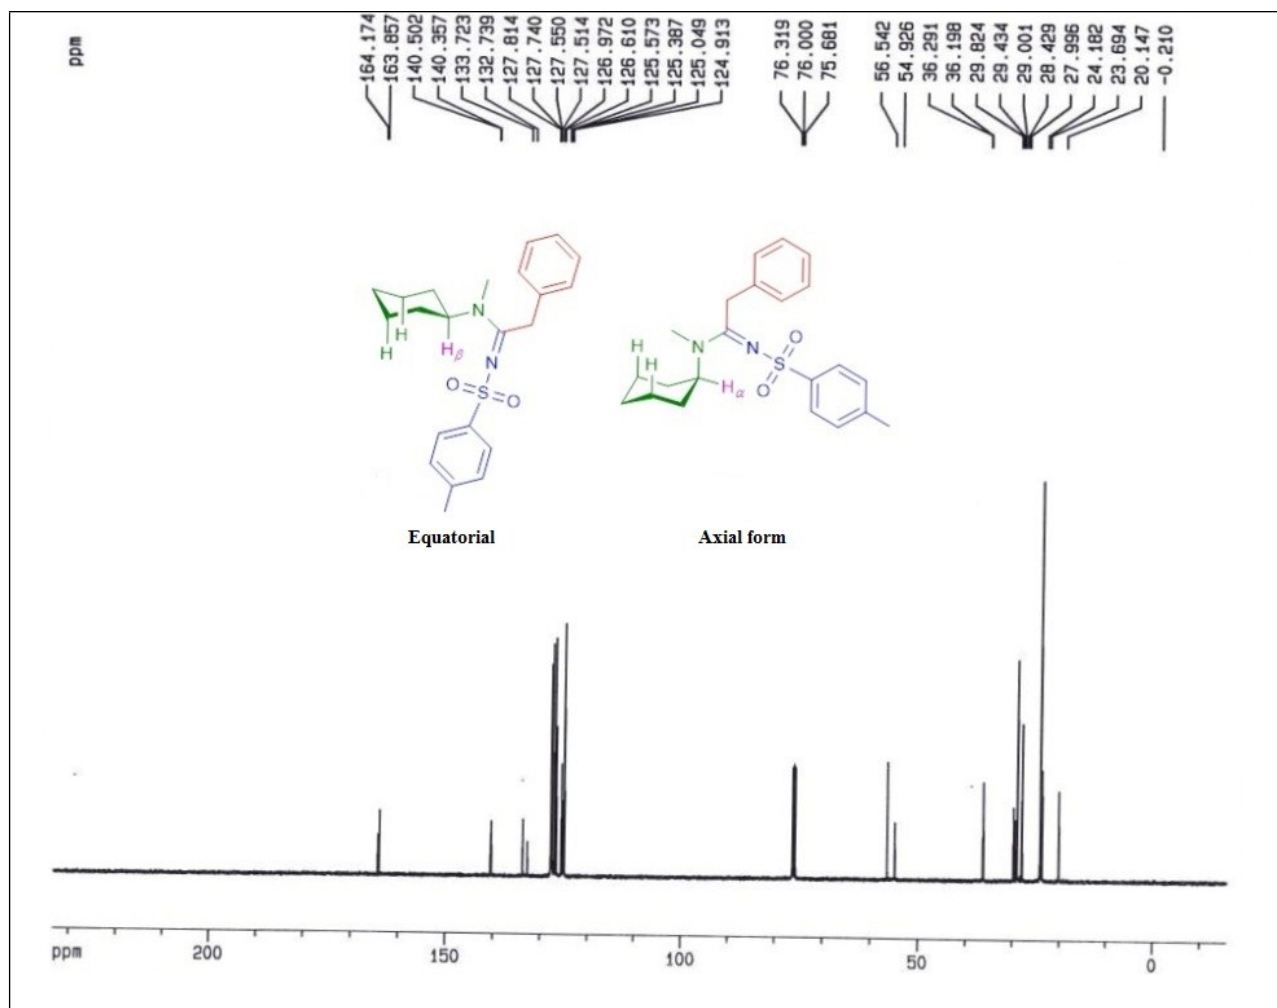

**Figure 34:**  $^{13}\text{C}$  NMR spectrum (100 MHz) of compound **4g** in  $\text{CDCl}_3$ .

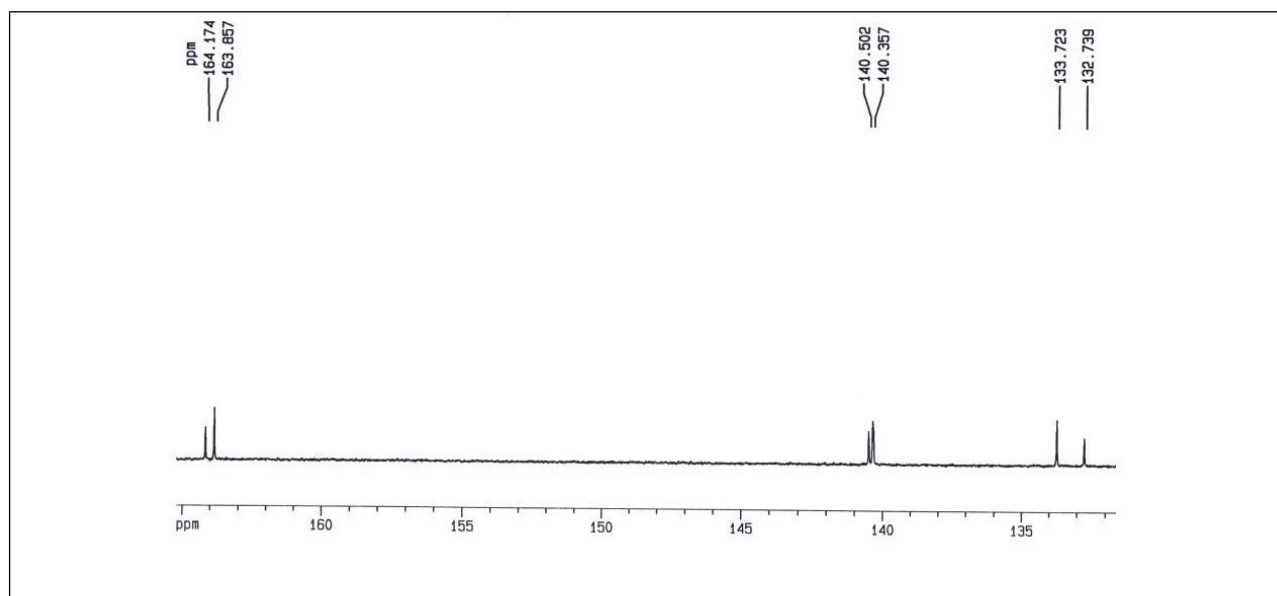

**Figure 35:** Expanded  $^{13}\text{C}$  NMR spectrum (100 MHz) of compound **4g** in  $\text{CDCl}_3$ .

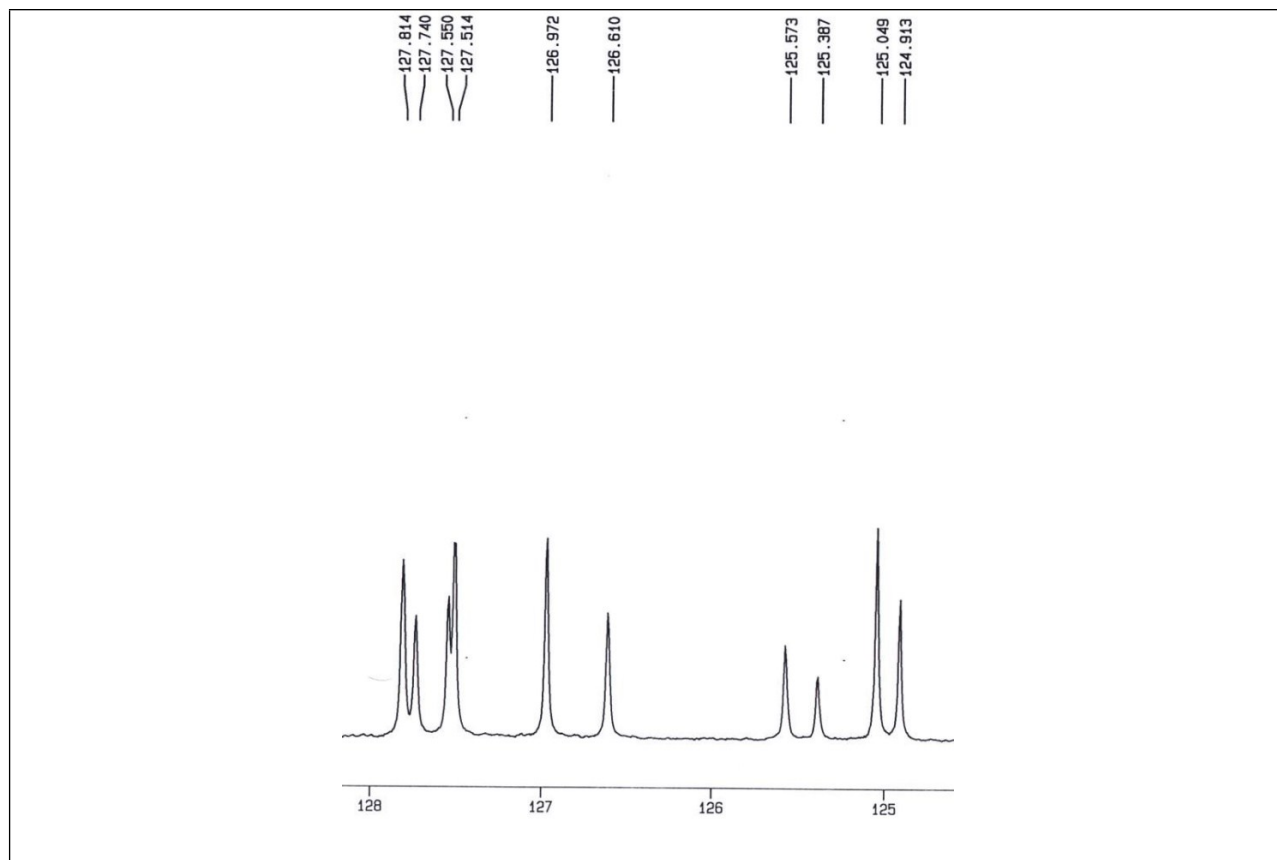

**Figure 36:** Expanded (2)  $^{13}\text{C}$  NMR spectrum (100 MHz) of compound **4g** in  $\text{CDCl}_3$ .

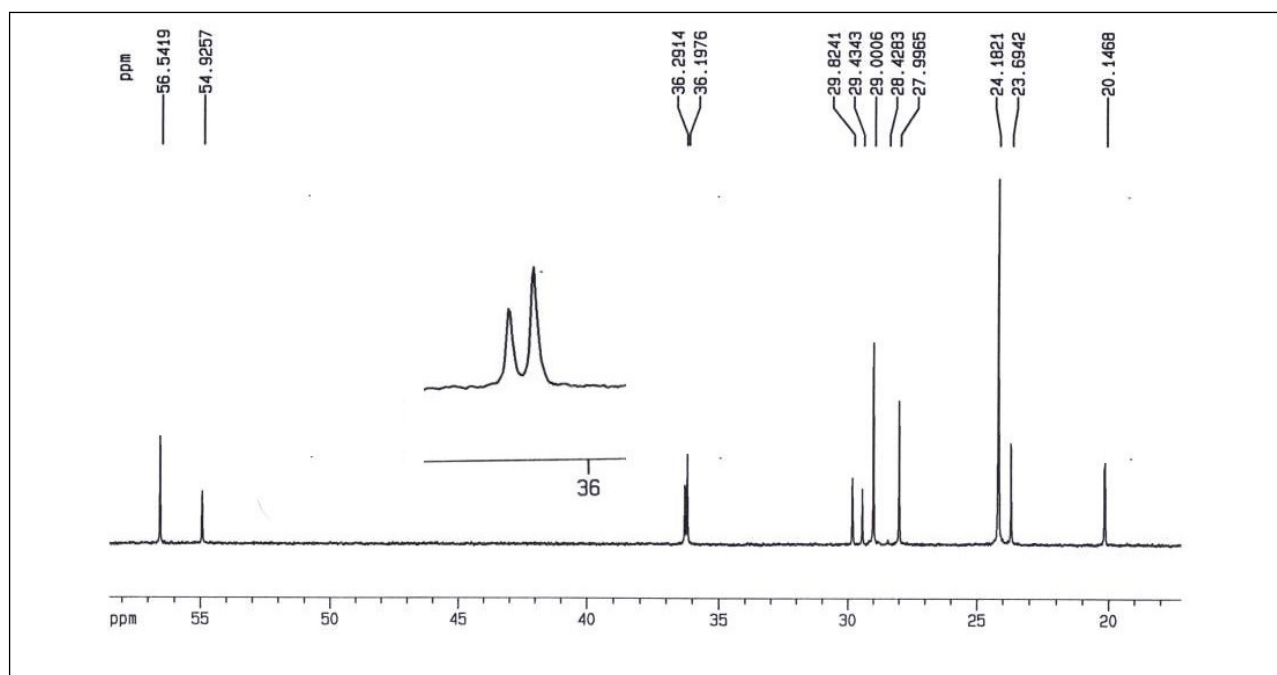

**Figure 37:** Expanded (3)  $^{13}\text{C}$  NMR spectrum (100 MHz) of compound **4g** in  $\text{CDCl}_3$ .

*N*<sup>1</sup>-Cyclohexyl-*N*<sup>1</sup>-methyl-*N*<sup>2</sup>-(phenylsulfonyl)-2-phenylacetamide (**4h**):

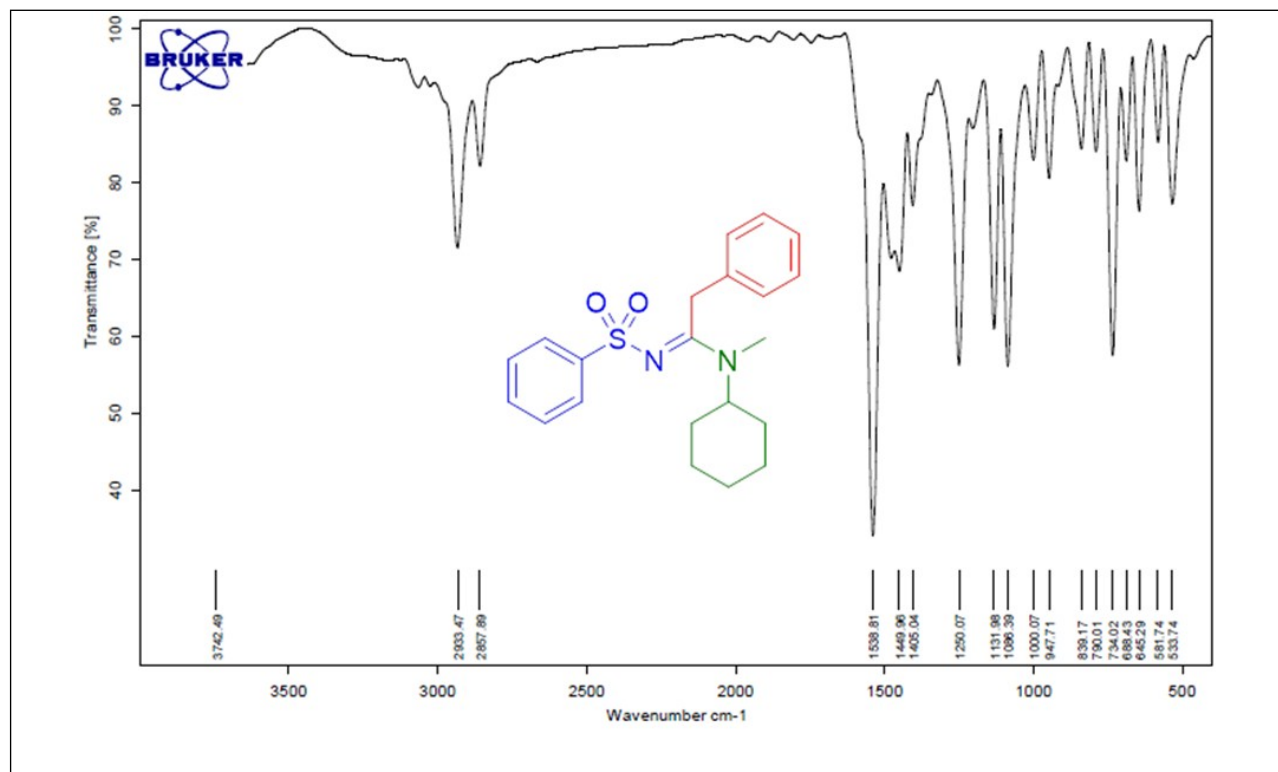

**Figure 38:** FTIR spectrum (KBr) of compound **4h**.

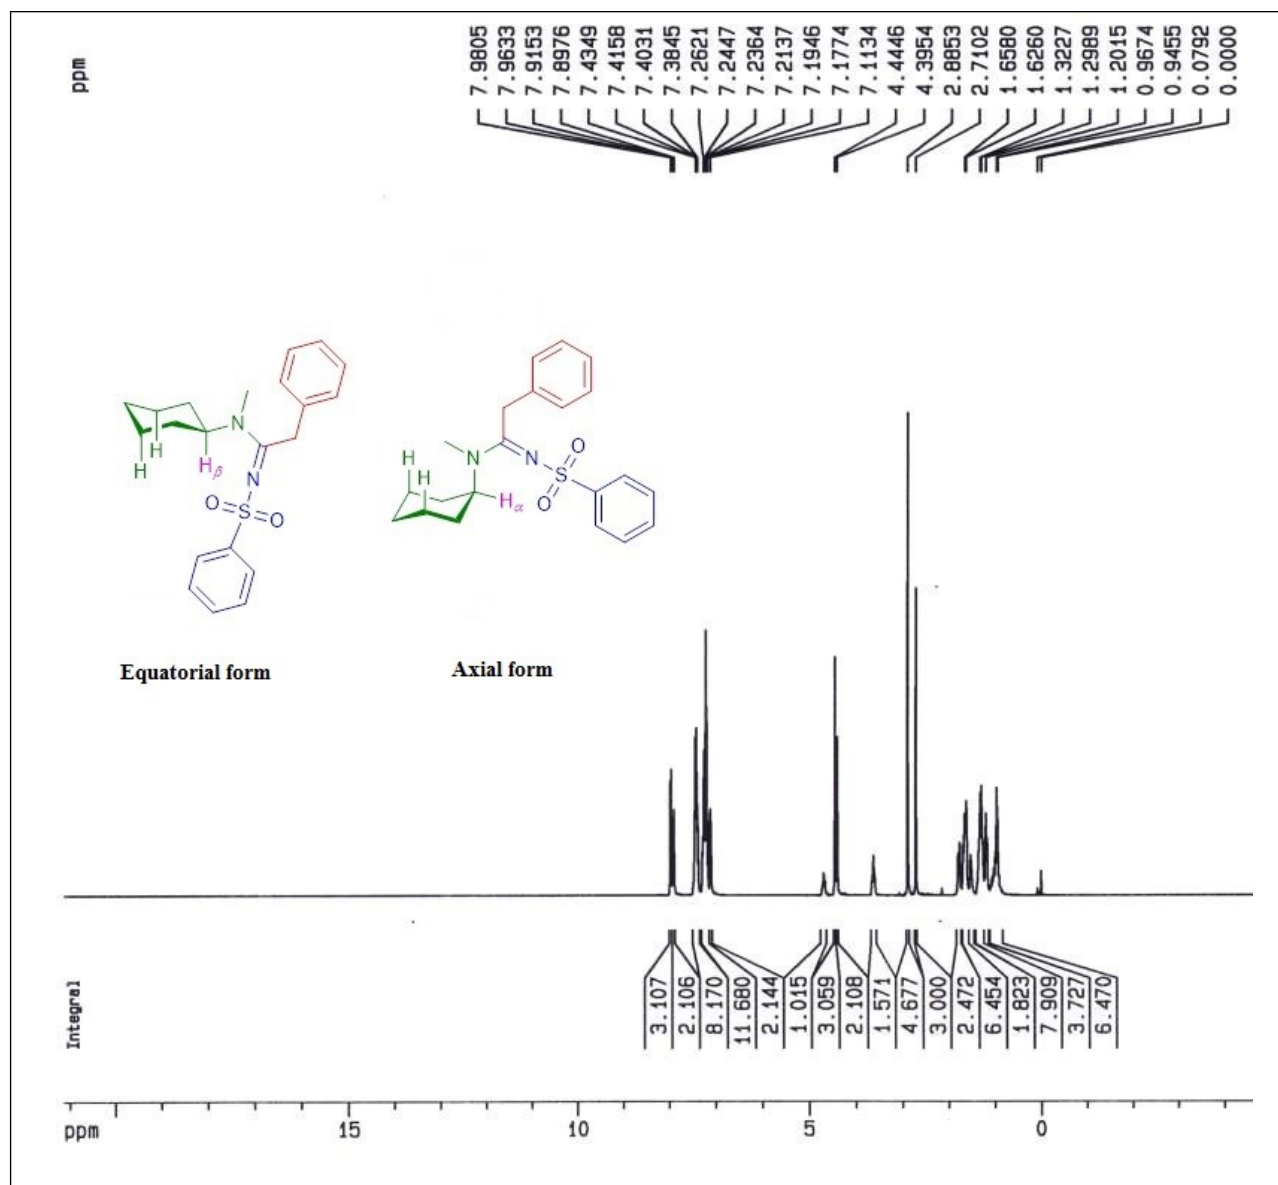

**Figure 39:**  $^1\text{H}$  NMR spectrum (400 MHz) of compound **4h** in  $\text{CDCl}_3$ .

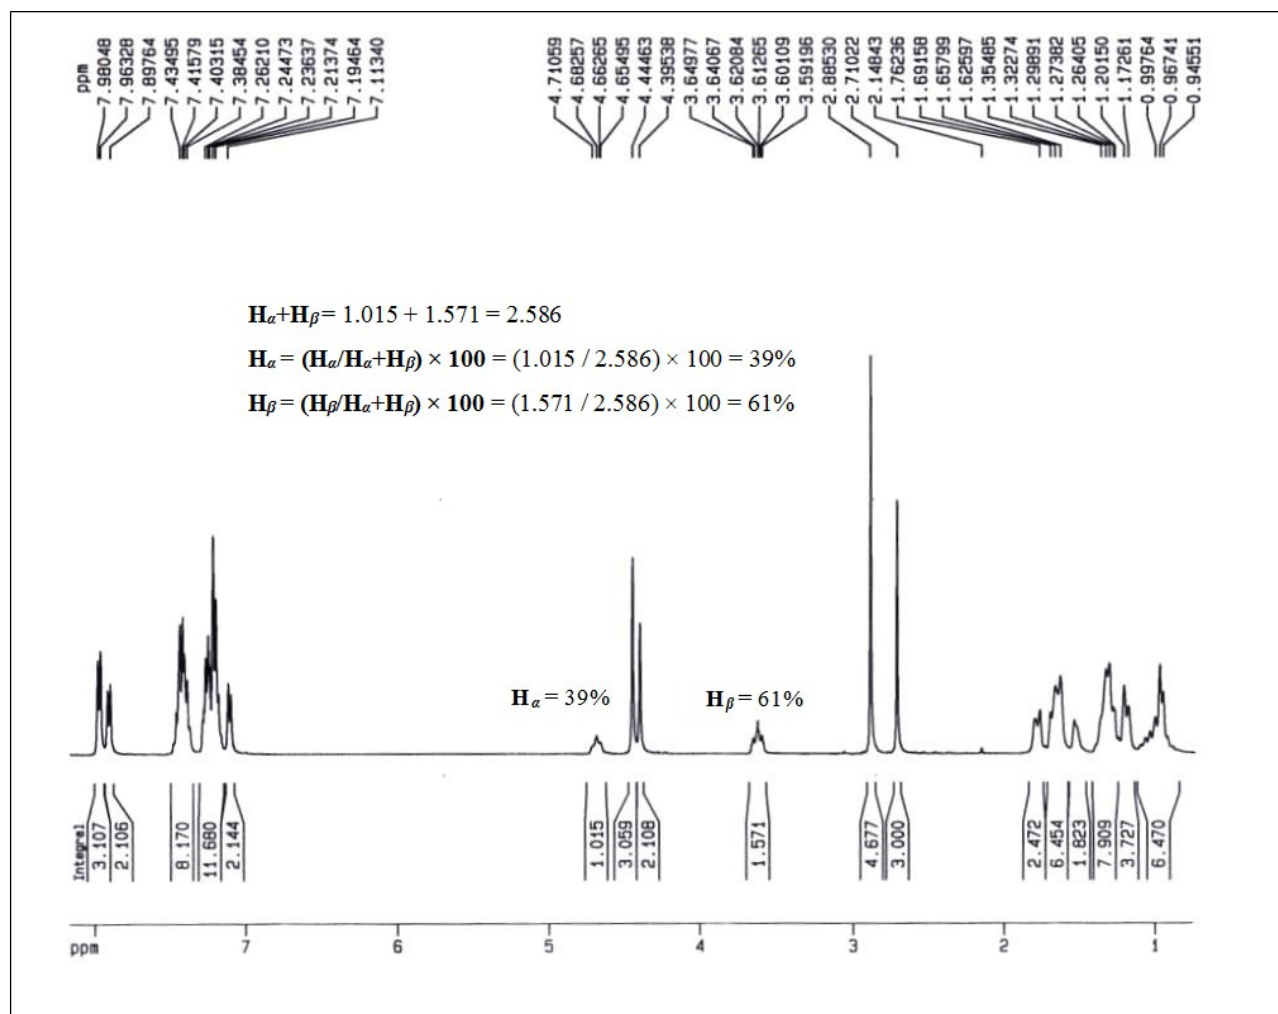

**Figure 40:** Expanded (1)  $^1\text{H}$  NMR spectrum (400 MHz) of compound **4h** in  $\text{CDCl}_3$ .

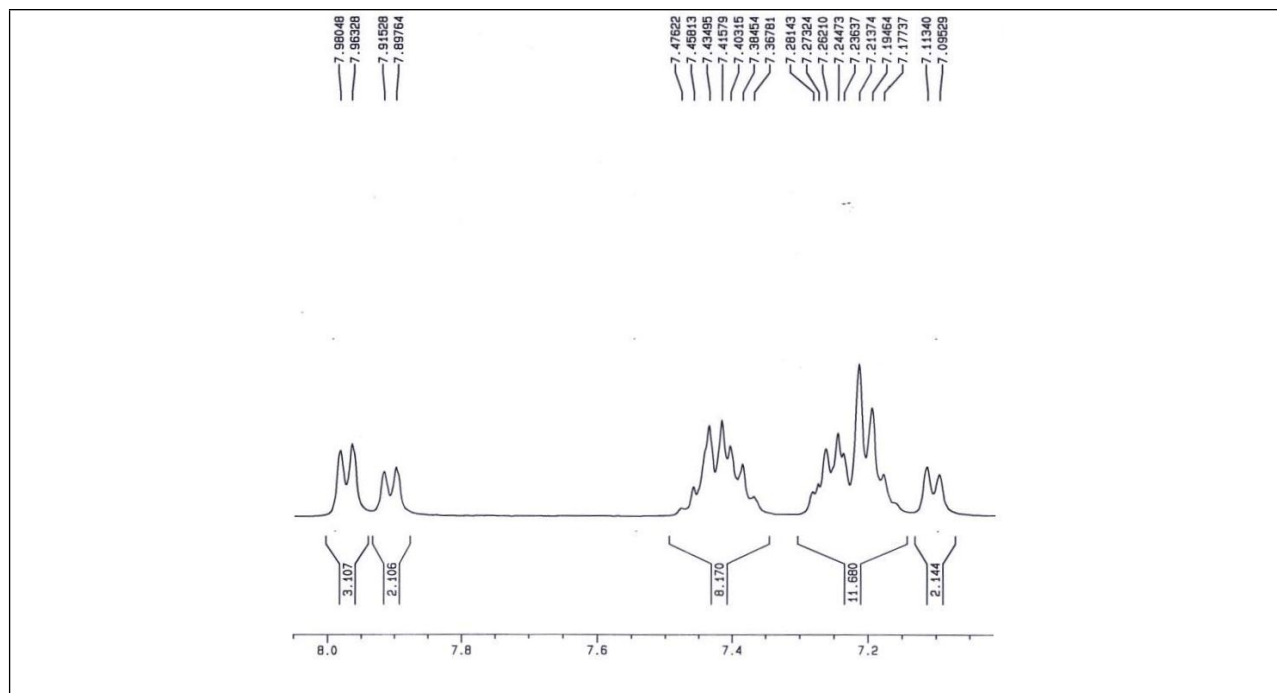

**Figure 41:** Expanded (2)  $^1\text{H}$  NMR spectrum (400 MHz) of compound **4h** in  $\text{CDCl}_3$ .

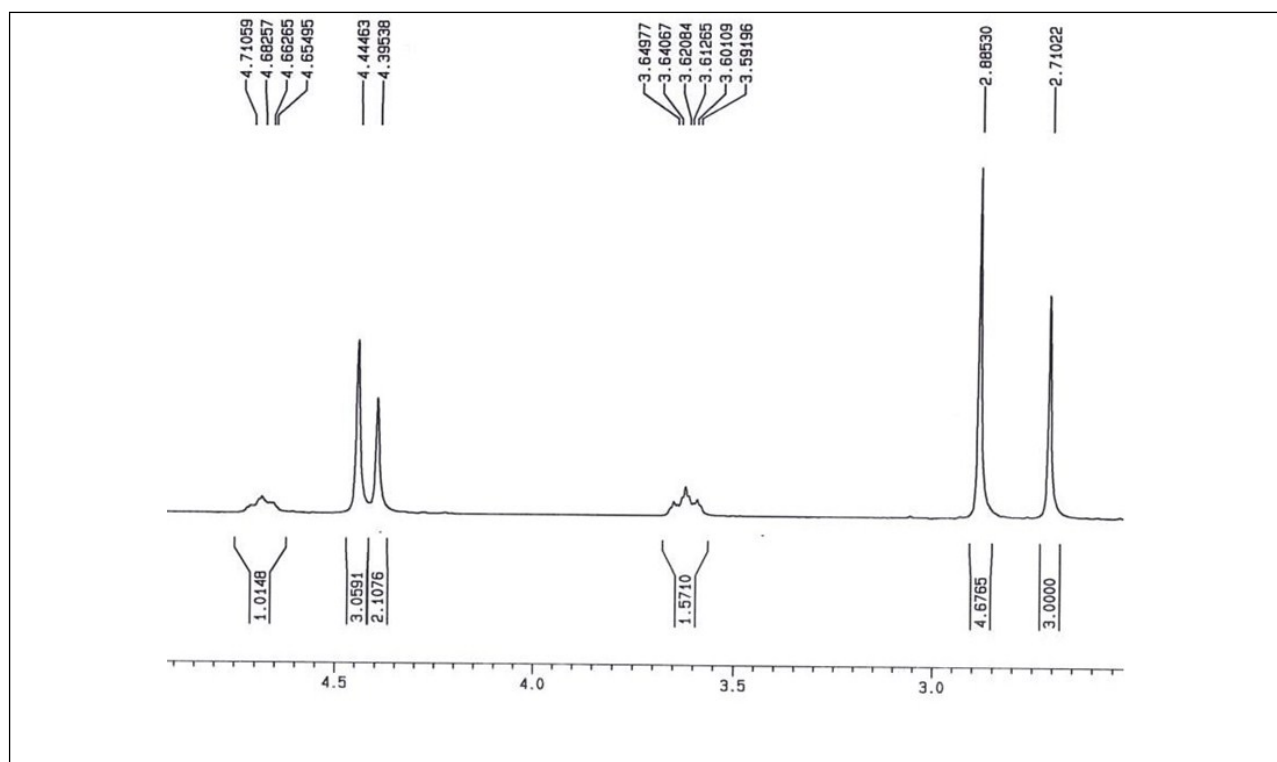

**Figure 42:** Expanded (3)  $^1\text{H}$  NMR spectrum (400 MHz) of compound **4h** in  $\text{CDCl}_3$ .



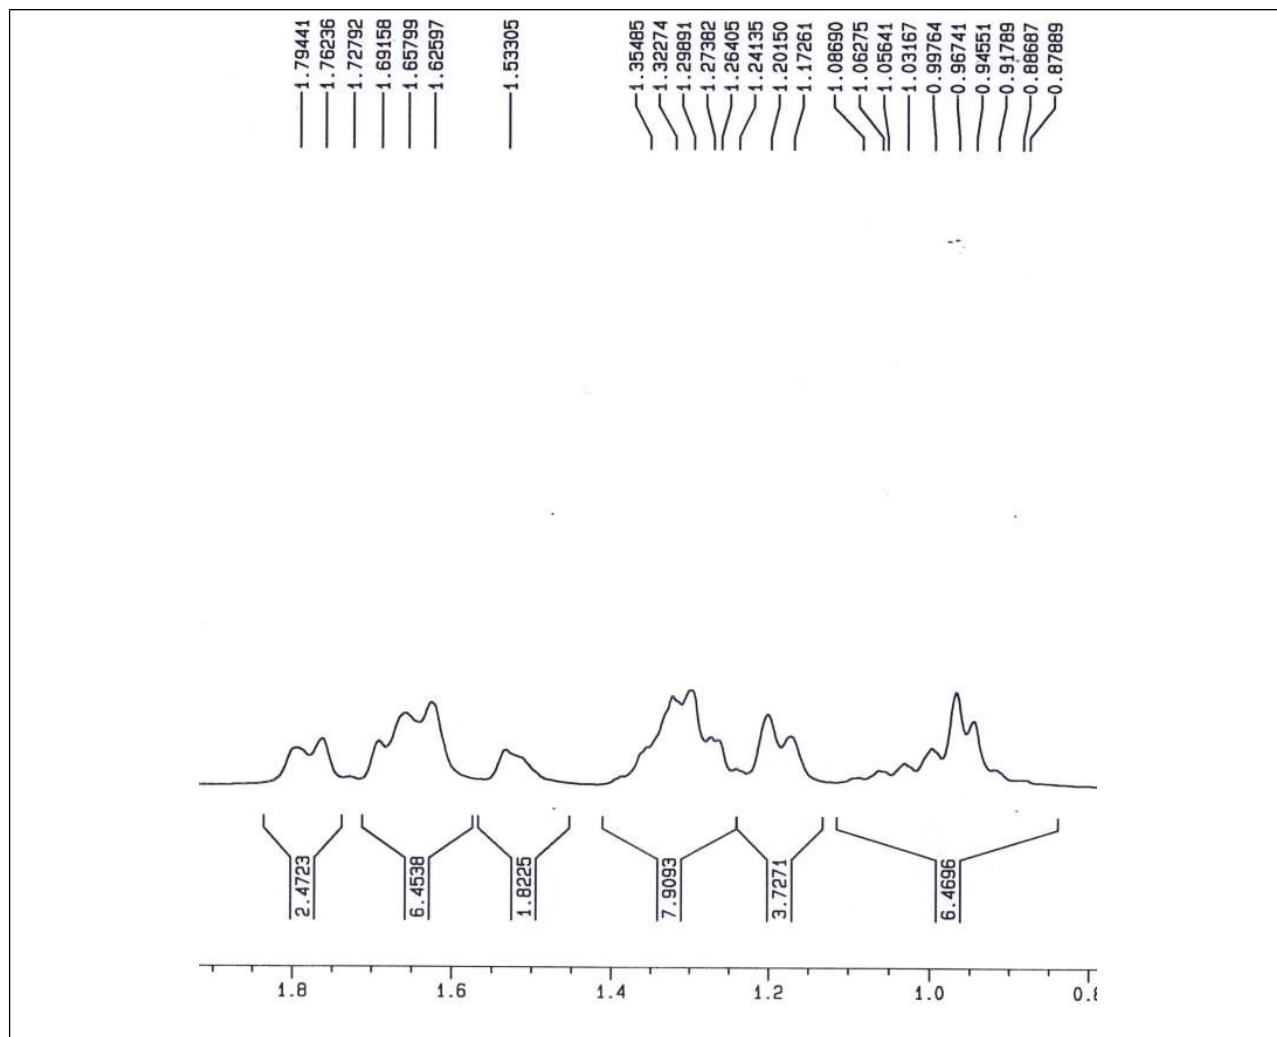

**Figure 43:** Expanded (4)  $^1\text{H}$  NMR spectrum (400 MHz) of compound **4h** in  $\text{CDCl}_3$ .

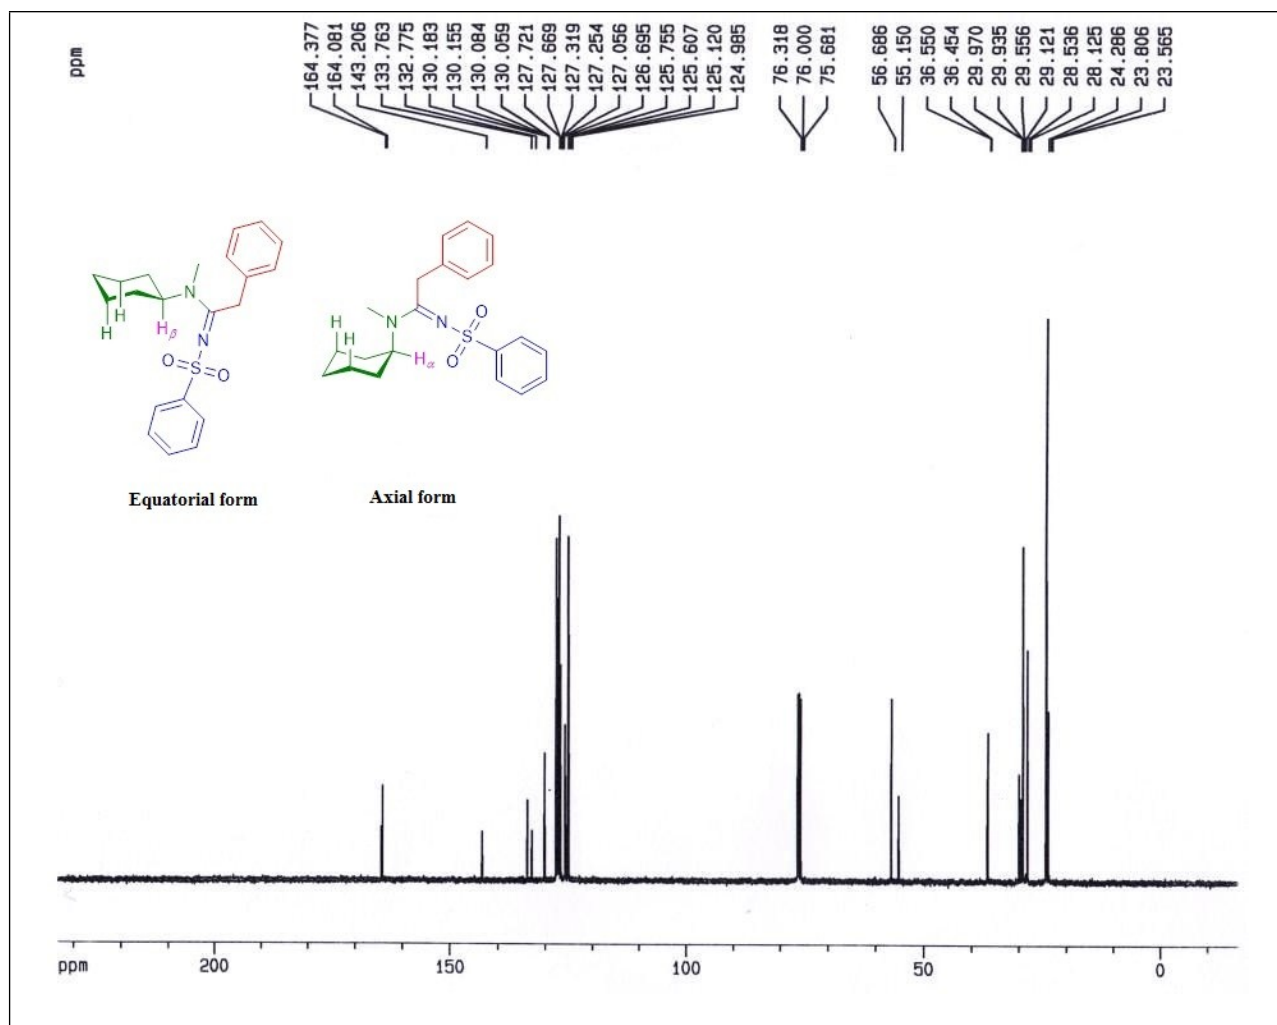

**Figure 44:**  $^{13}\text{C}$  NMR spectrum (400 MHz) of compound **4h** in  $\text{CDCl}_3$ .

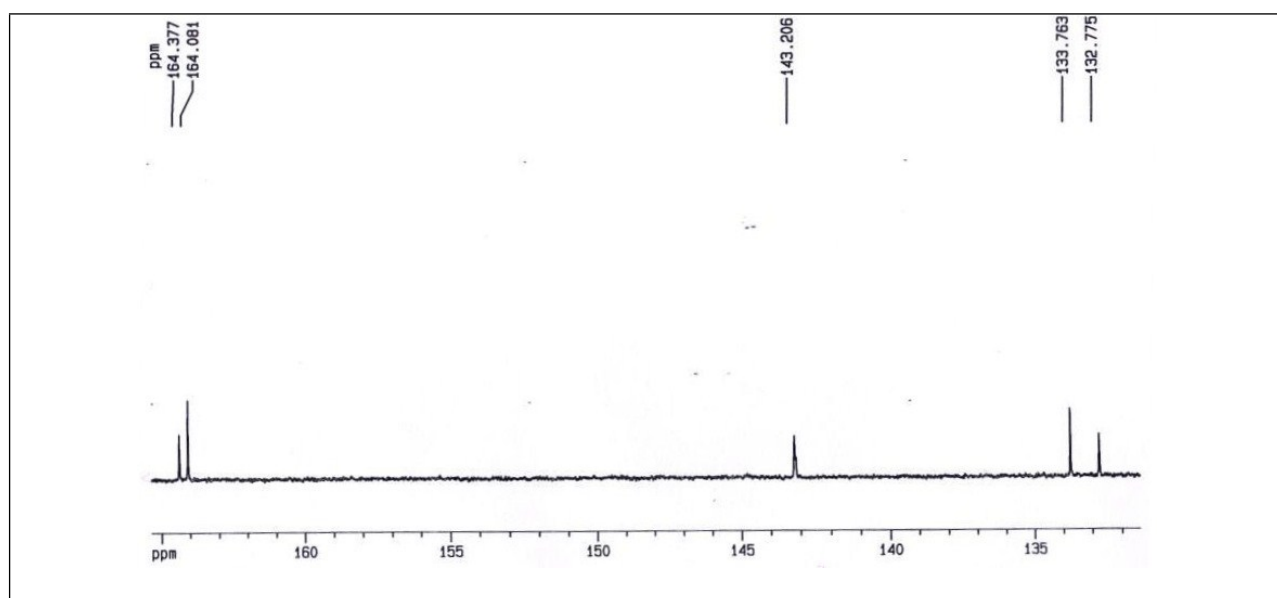

**Figure 45:** Expanded (1)  $^{13}\text{C}$  NMR spectrum (400 MHz) of compound **4h** in  $\text{CDCl}_3$ .

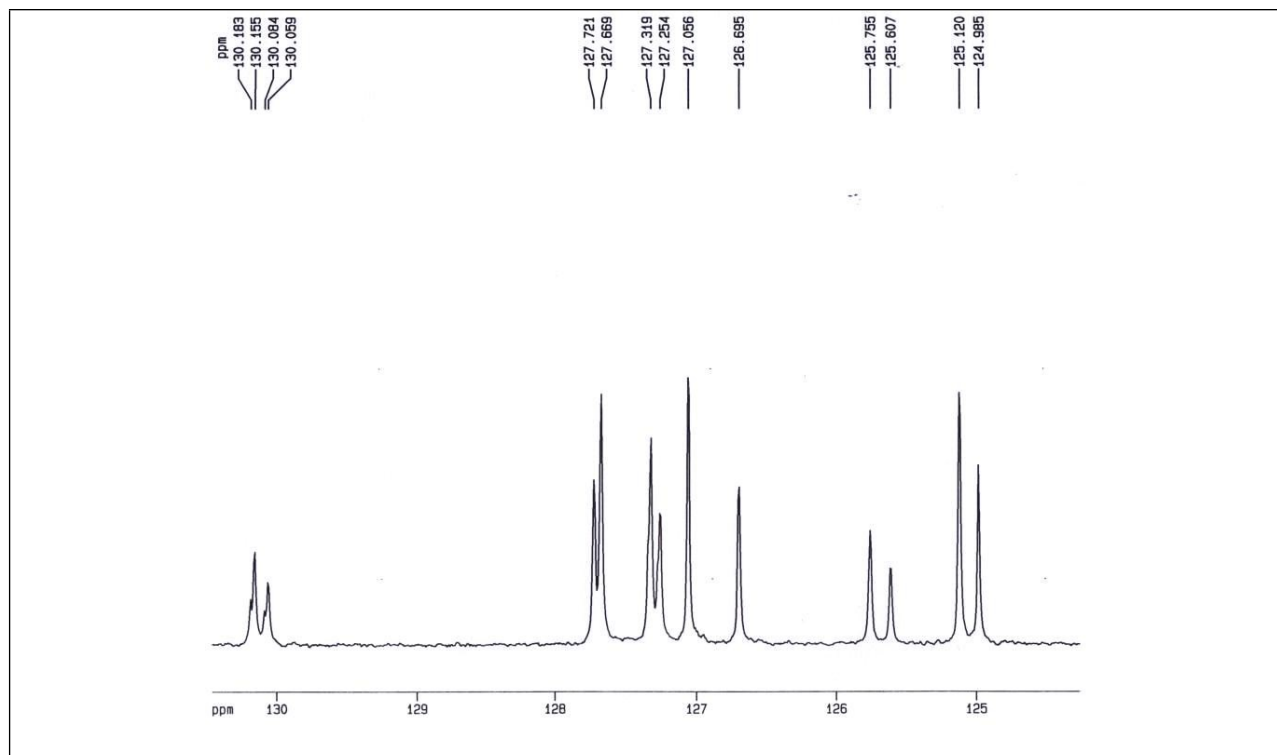

**Figure 46:** Expanded (2)  $^{13}\text{C}$  NMR spectrum (100 MHz) of compound **4h** in  $\text{CDCl}_3$ .

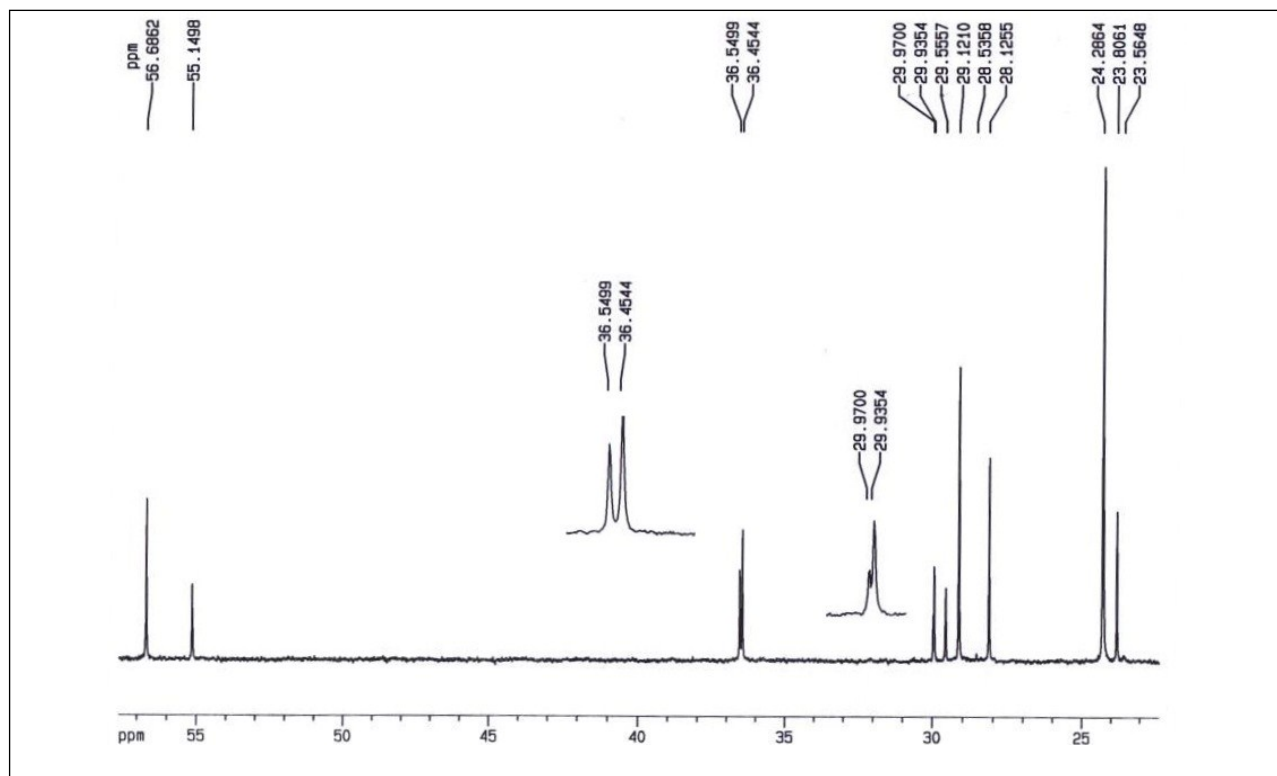

**Figure 47:** Expanded (3)  $^{13}\text{C}$  NMR spectrum (100 MHz) of compound **4h** in  $\text{CDCl}_3$ .

*N*<sup>1</sup>-Cyclohexyl-*N*<sup>1</sup>-methyl-*N*<sup>2</sup>-(methylsulfonyl)-2-phenylacetamidine (**4i**):

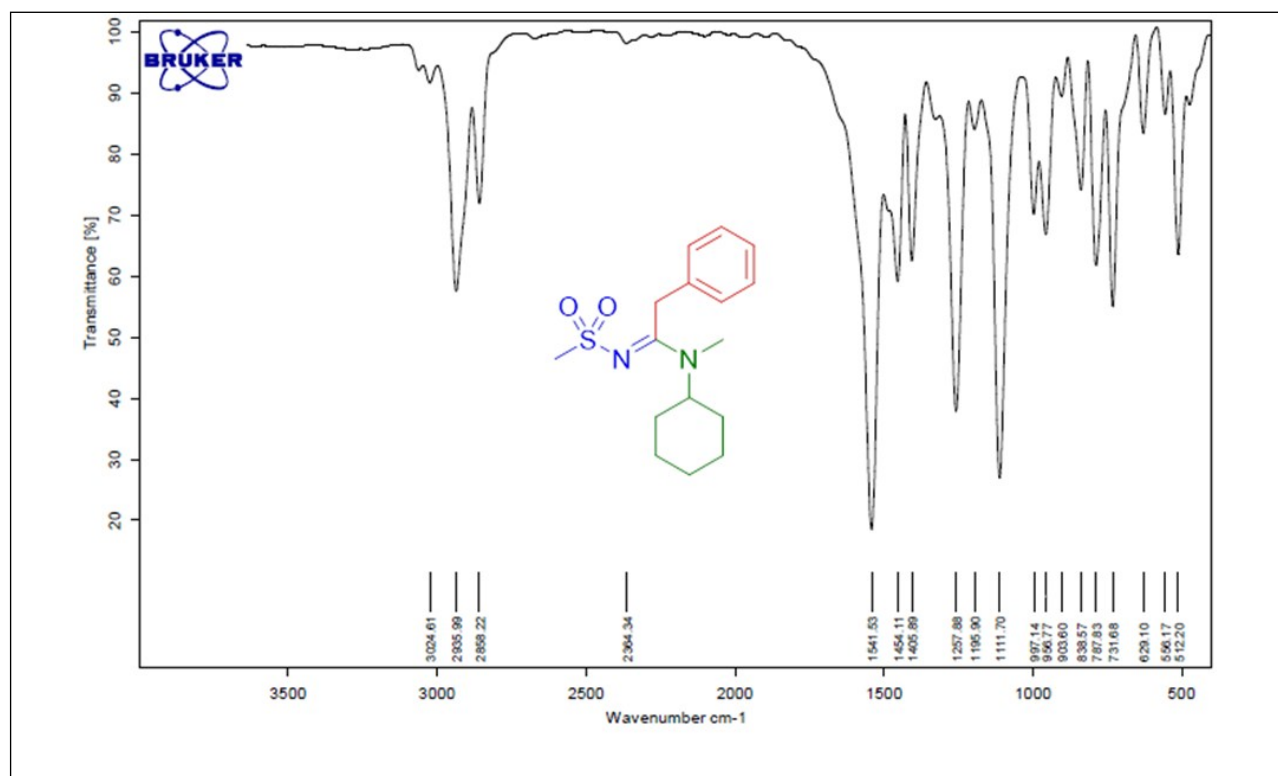

**Figure 48:** FTIR spectrum (KBr) of compound **4i**.

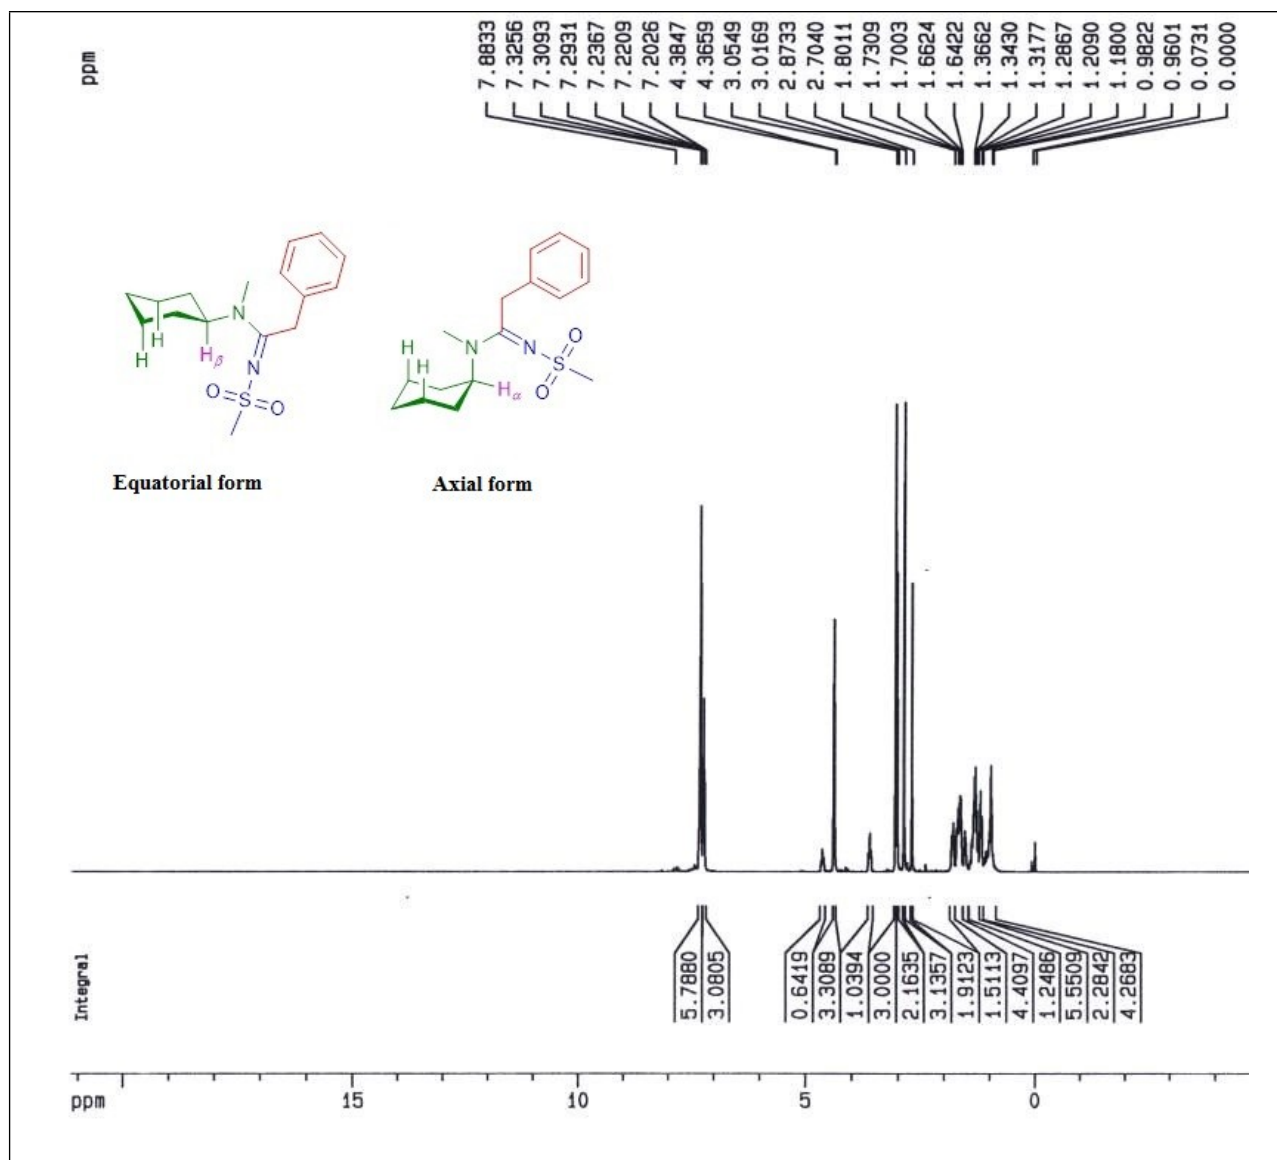

Figure 49:  $^1\text{H}$  NMR spectrum (400 MHz) of compound 4i in  $\text{CDCl}_3$ .

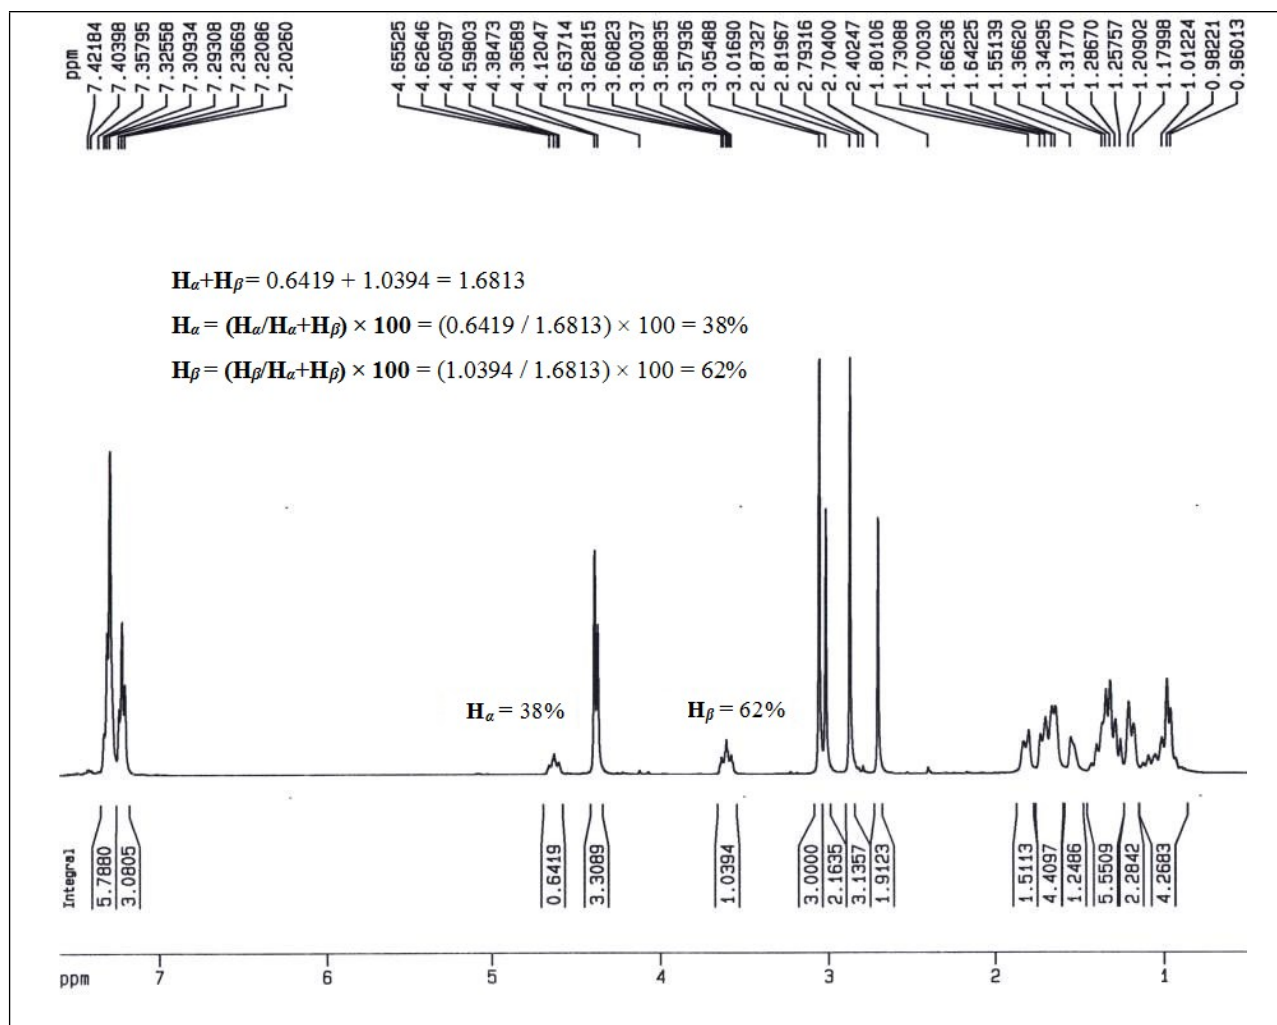

**Figure 50:** Expanded (1)  $^1\text{H}$  NMR spectrum (400 MHz) of compound **4i** in  $\text{CDCl}_3$ .

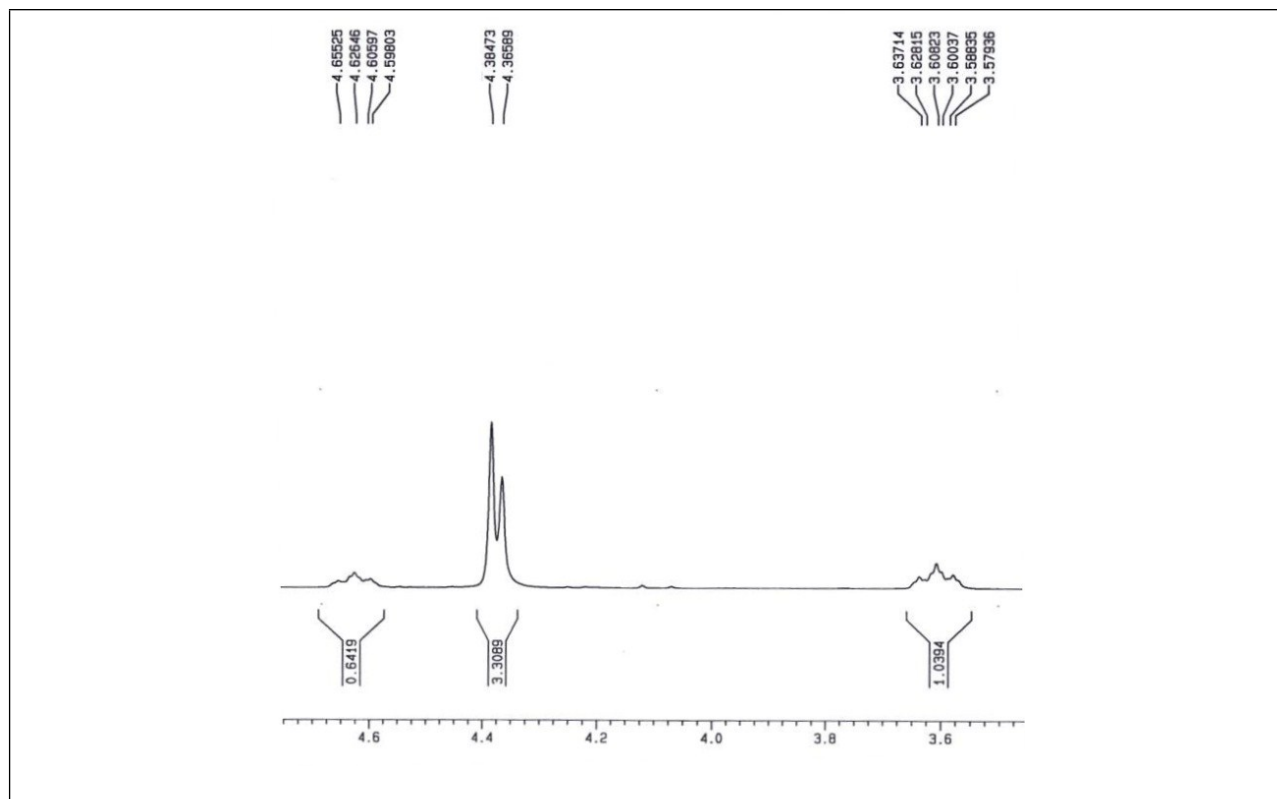

**Figure 51:** Expanded (2)  $^1\text{H}$  NMR spectrum (400 MHz) of compound **4i** in  $\text{CDCl}_3$ .

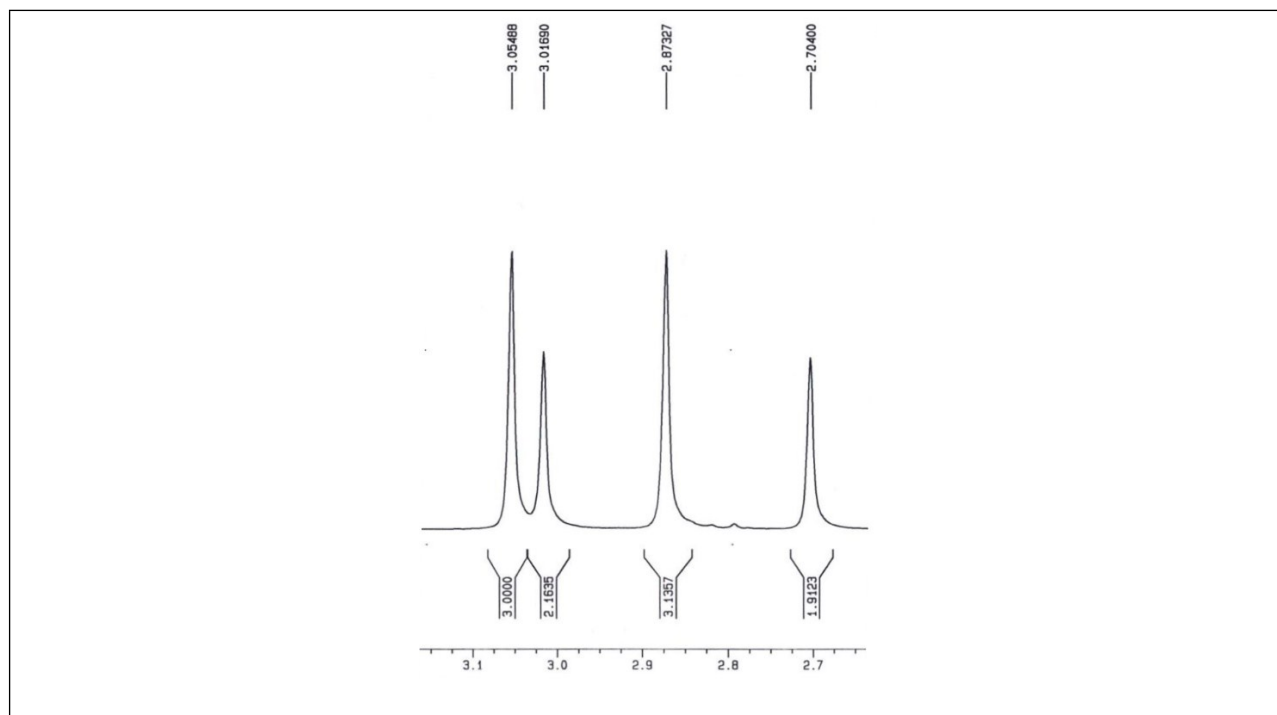

**Figure 52:** Expanded (3)  $^1\text{H}$  NMR spectrum (400 MHz) of compound **4i** in  $\text{CDCl}_3$ .

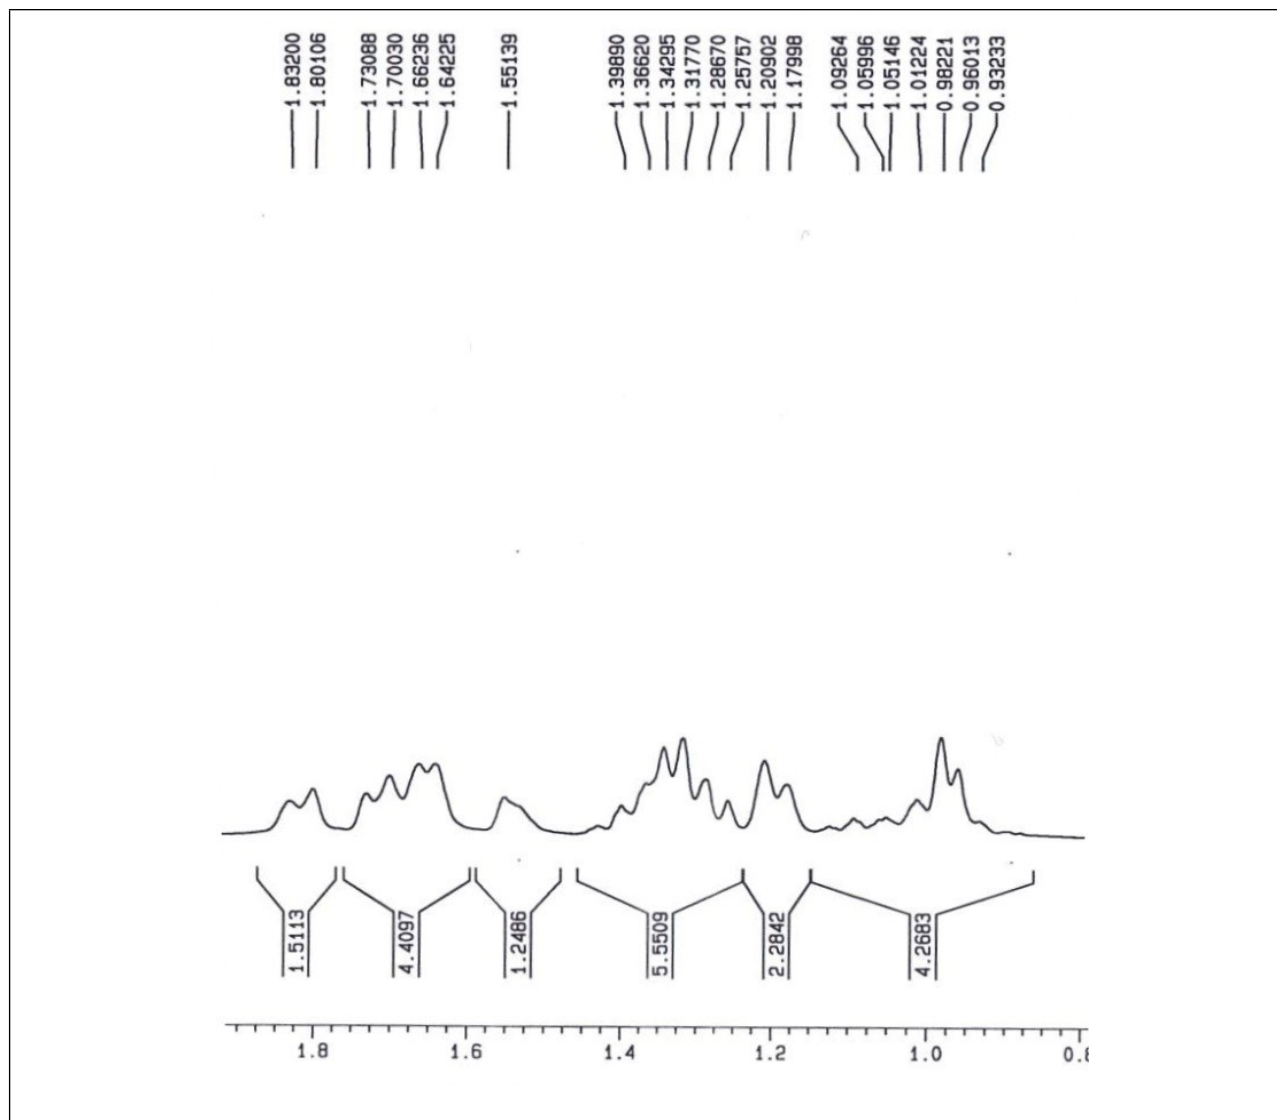

**Figure 53:** Expanded (4)  $^1\text{H}$  NMR spectrum (400 MHz) of compound **4i** in  $\text{CDCl}_3$ .



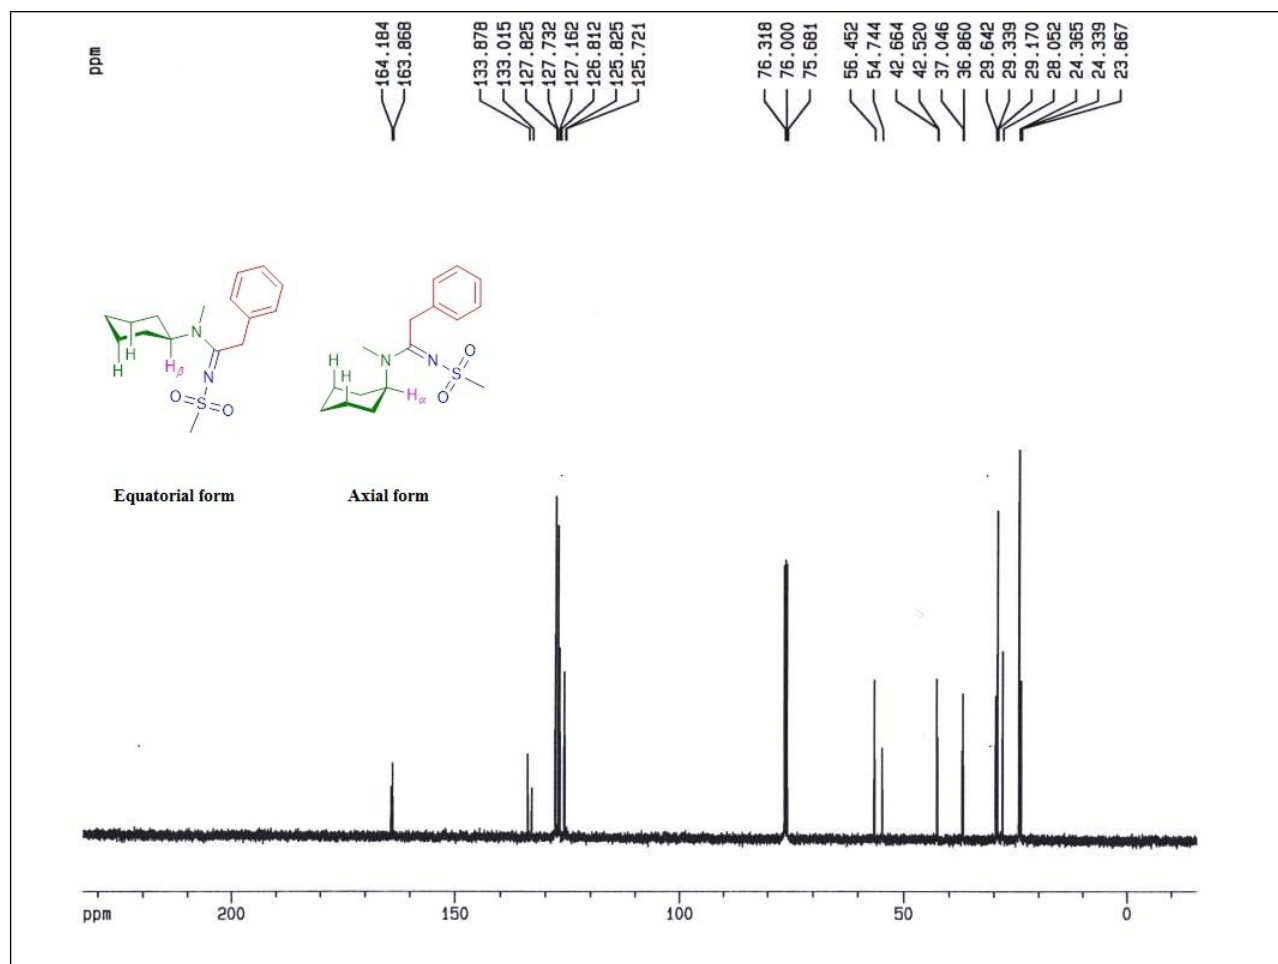

**Figure 54:**  $^{13}\text{C}$  NMR spectrum (100 MHz) of compound **4i** in  $\text{CDCl}_3$ .

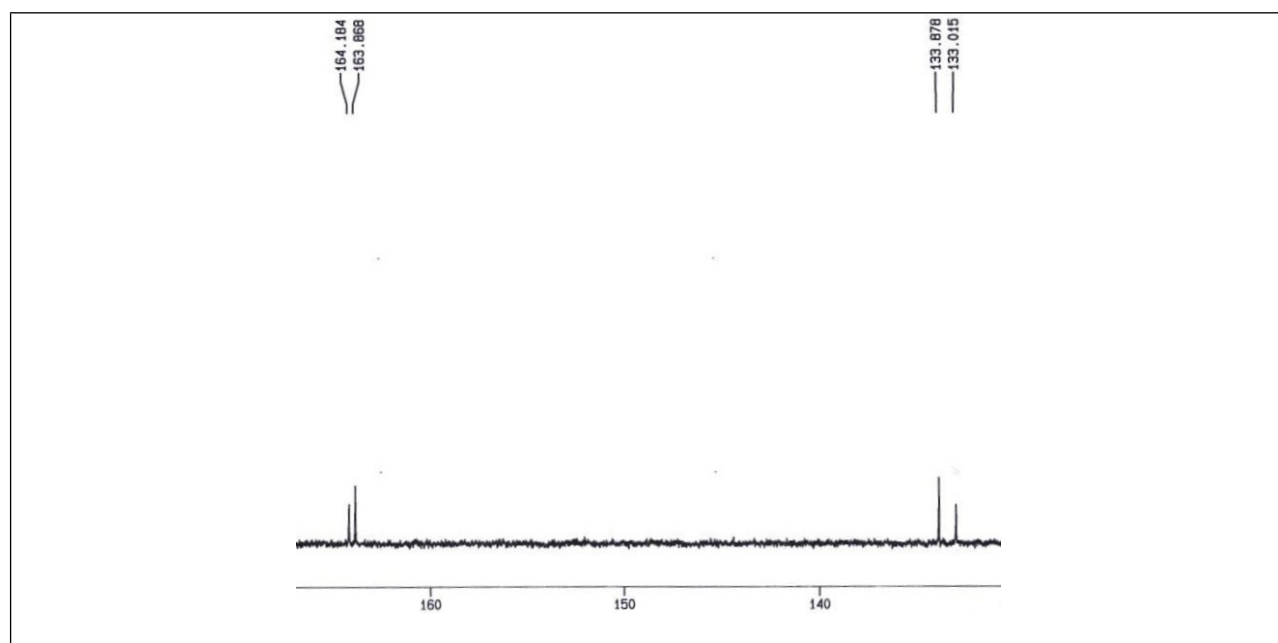

**Figure 55:** Expanded (1)  $^{13}\text{C}$  NMR spectrum (400 MHz) of compound **4i** in  $\text{CDCl}_3$ .

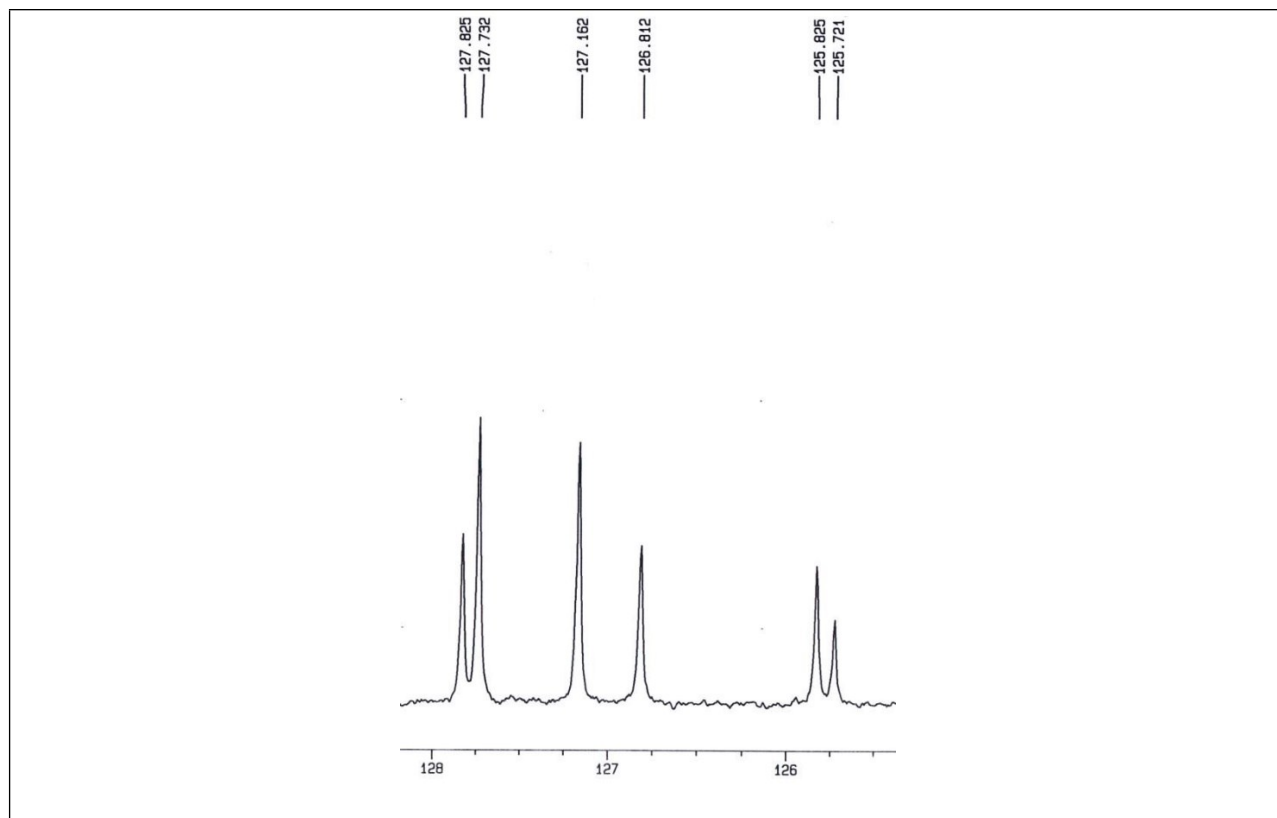

**Figure 56:** Expanded (2)  $^{13}\text{C}$  NMR spectrum (100 MHz) of compound **4i** in  $\text{CDCl}_3$ .

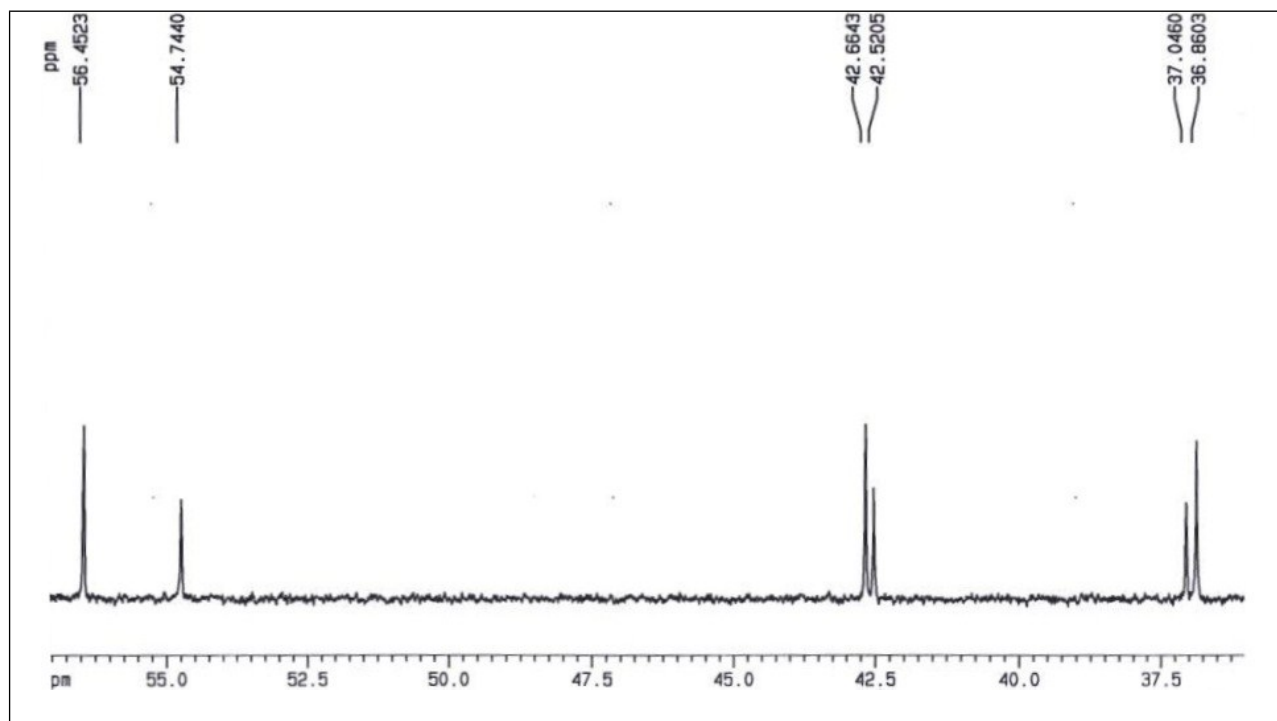

**Figure 57:** Expanded (3)  $^{13}\text{C}$  NMR spectrum (400 MHz) of compound **4i** in  $\text{CDCl}_3$ .

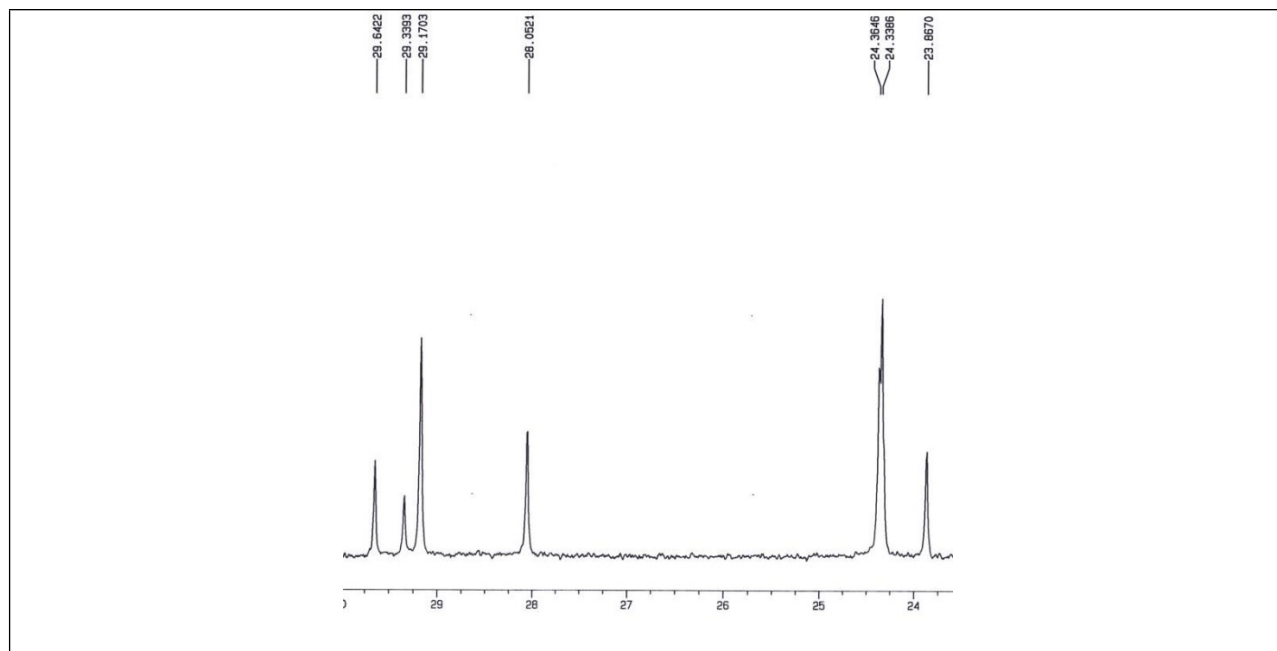

Figure 58: Expanded (4)  $^{13}\text{C}$  NMR spectrum (100 MHz) of compound **4i** in  $\text{CDCl}_3$ .

***N*<sup>1</sup>, *N*<sup>1</sup>-Dipropyl-*N*<sup>2</sup>-tosyl-2-phenylacetamide (**4j**):**

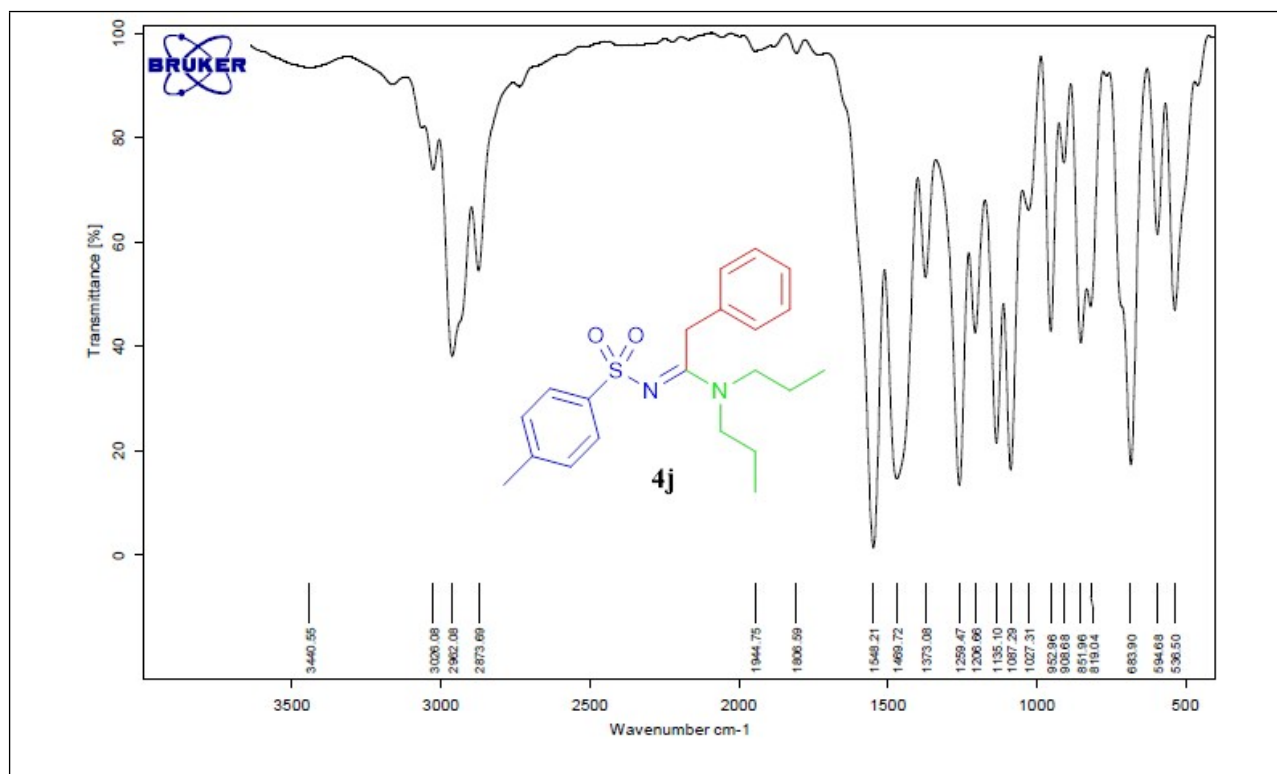

Figure 59: FTIR spectrum (KBr) of compound **4j**.

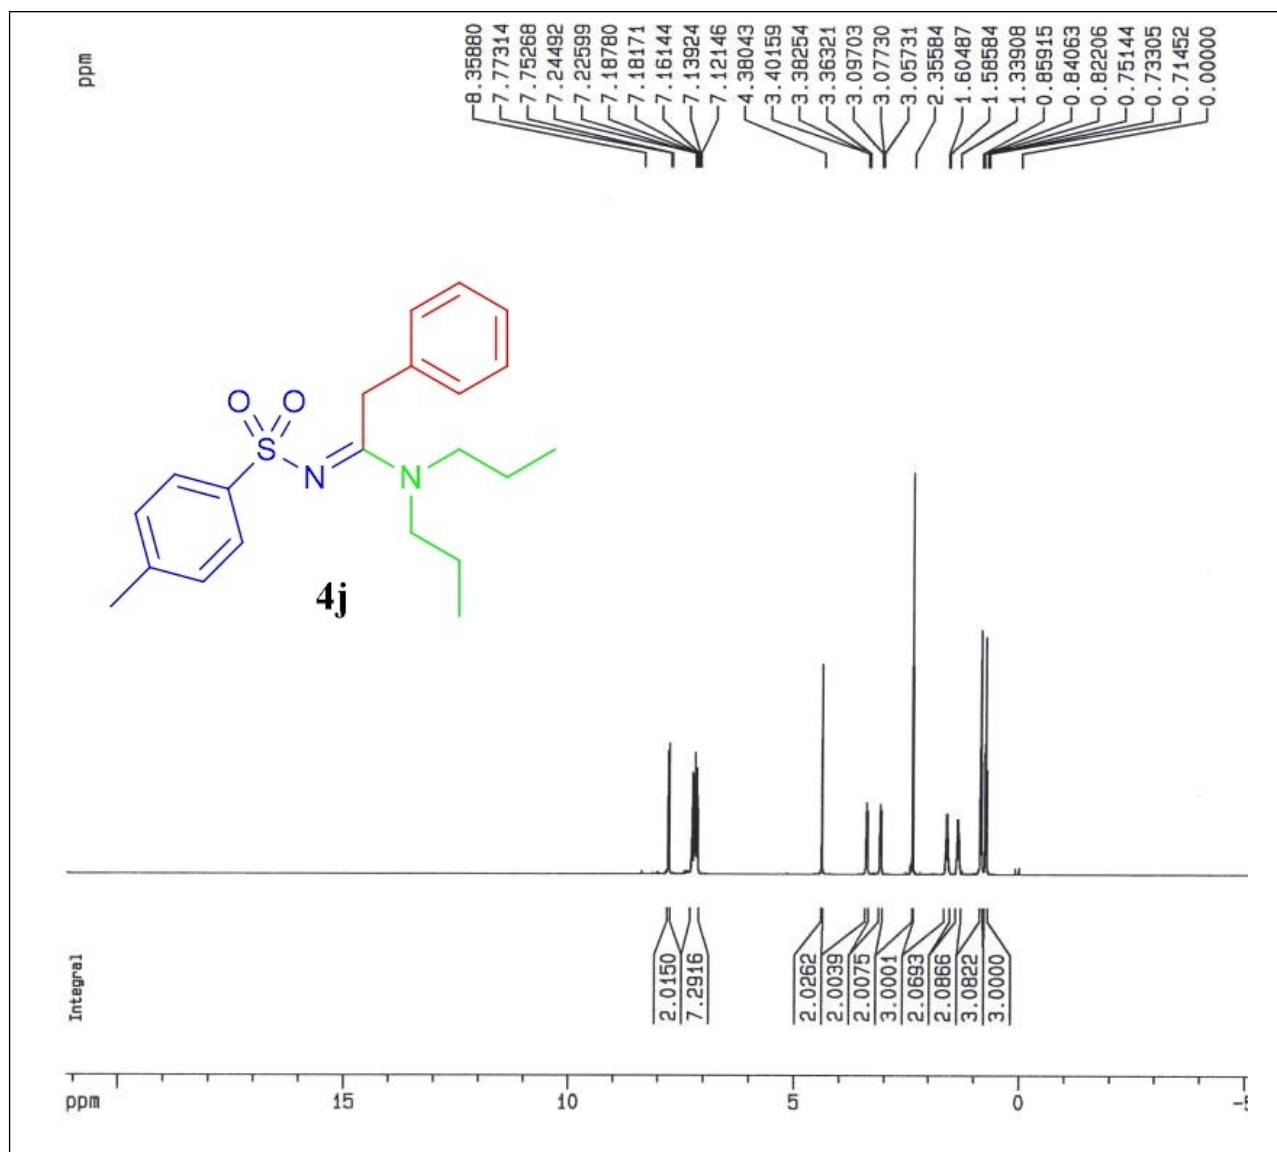

**Figure 60:**  $^1\text{H}$  NMR spectrum (400 MHz) of compound **4j** in  $\text{CDCl}_3$ .

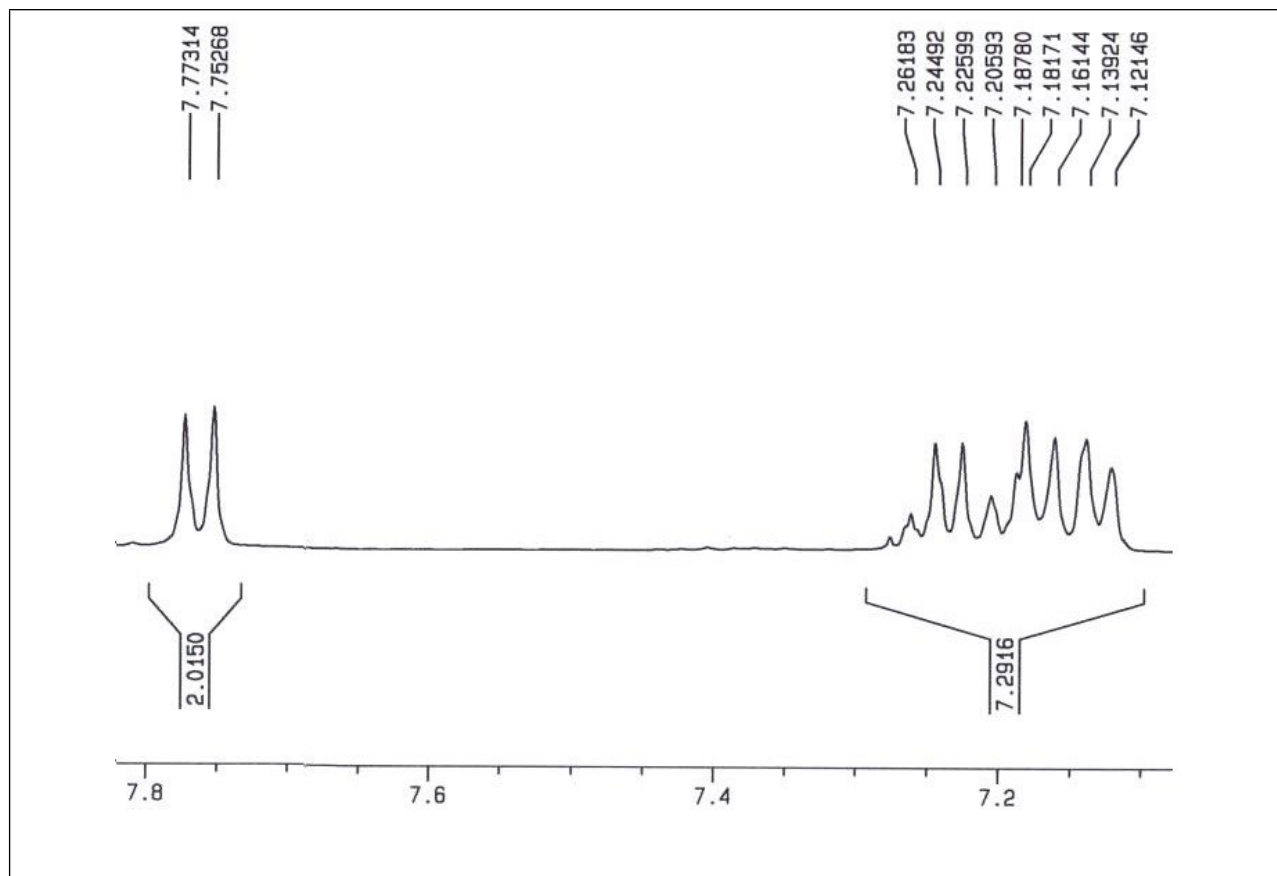

**Figure 61:** Expanded (1)  $^1\text{H}$  NMR spectrum (400 MHz) of compound **4j** in  $\text{CDCl}_3$ .

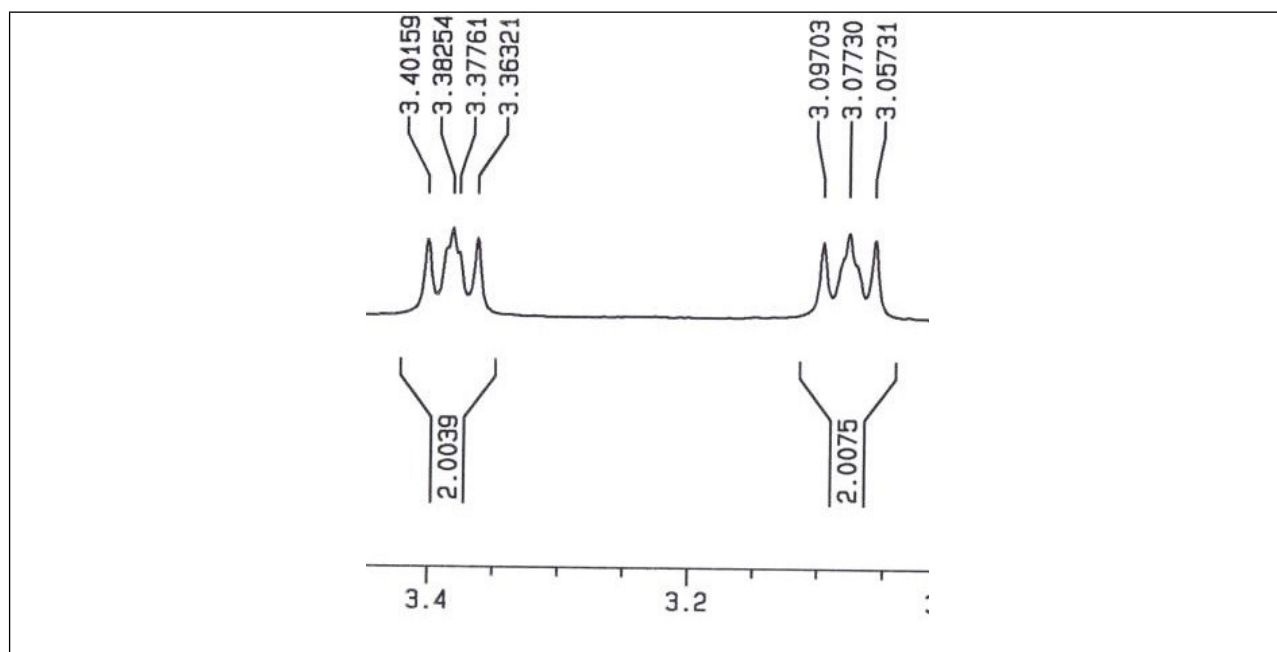

**Figure 62:** Expanded (2)  $^1\text{H}$  NMR spectrum (400 MHz) of compound **4j** in  $\text{CDCl}_3$ .

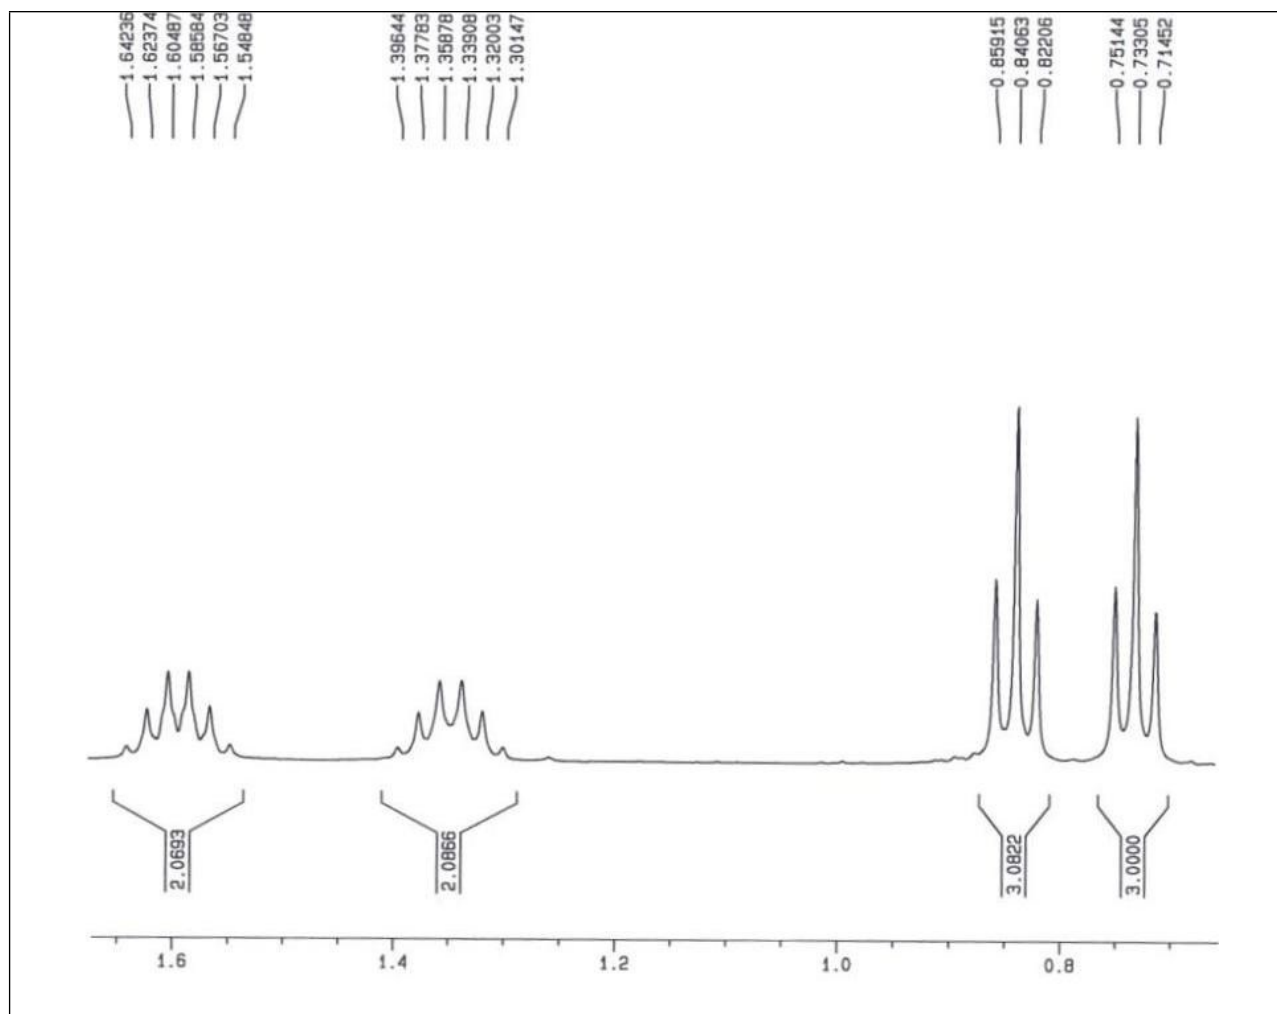

**Figure 63:** Expanded (3)  $^1\text{H}$  NMR spectrum (400 MHz) of compound **4j** in  $\text{CDCl}_3$ .

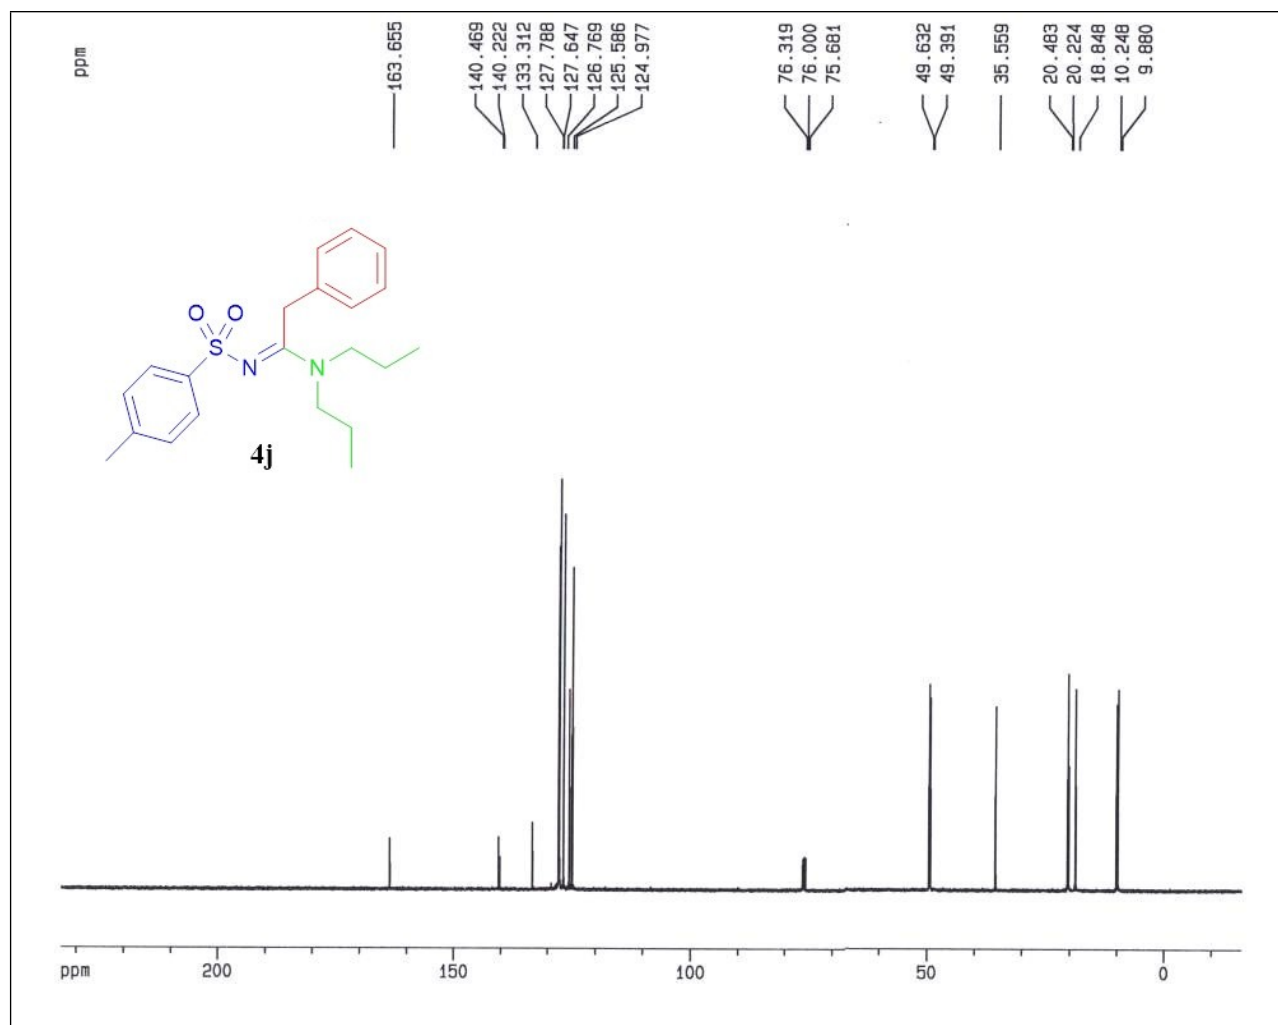

**Figure 64:** <sup>13</sup>C NMR spectrum (100 MHz) of compound **4j** in CDCl<sub>3</sub>.

For previous methods for synthesis of *N*<sup>1</sup>, *N*<sup>1</sup>-Dipropyl-*N*<sup>2</sup>-tosyl-2-phenylacetamide (**4j**), see reference **2a** and **2c**.

*N*<sup>1</sup>, *N*<sup>1</sup>-Dibutyl-*N*<sup>2</sup>-tosyl-2-phenylacetamide (**4k**):

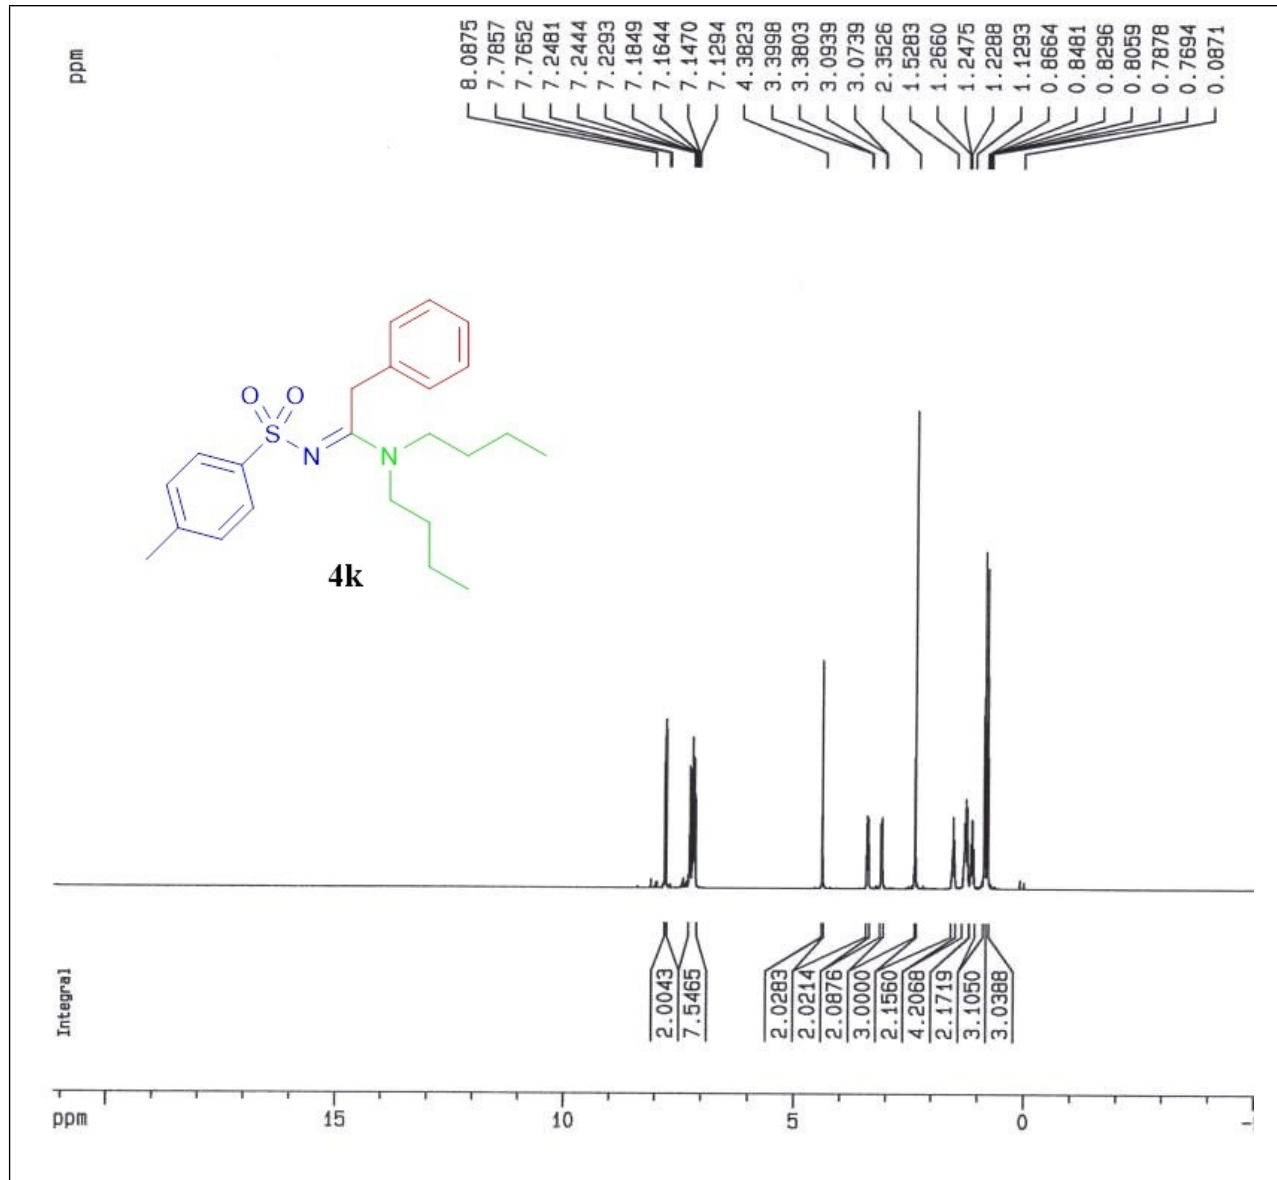

**Figure 65:** <sup>1</sup>H NMR spectrum (400 MHz) of compound **4k** in CDCl<sub>3</sub>.



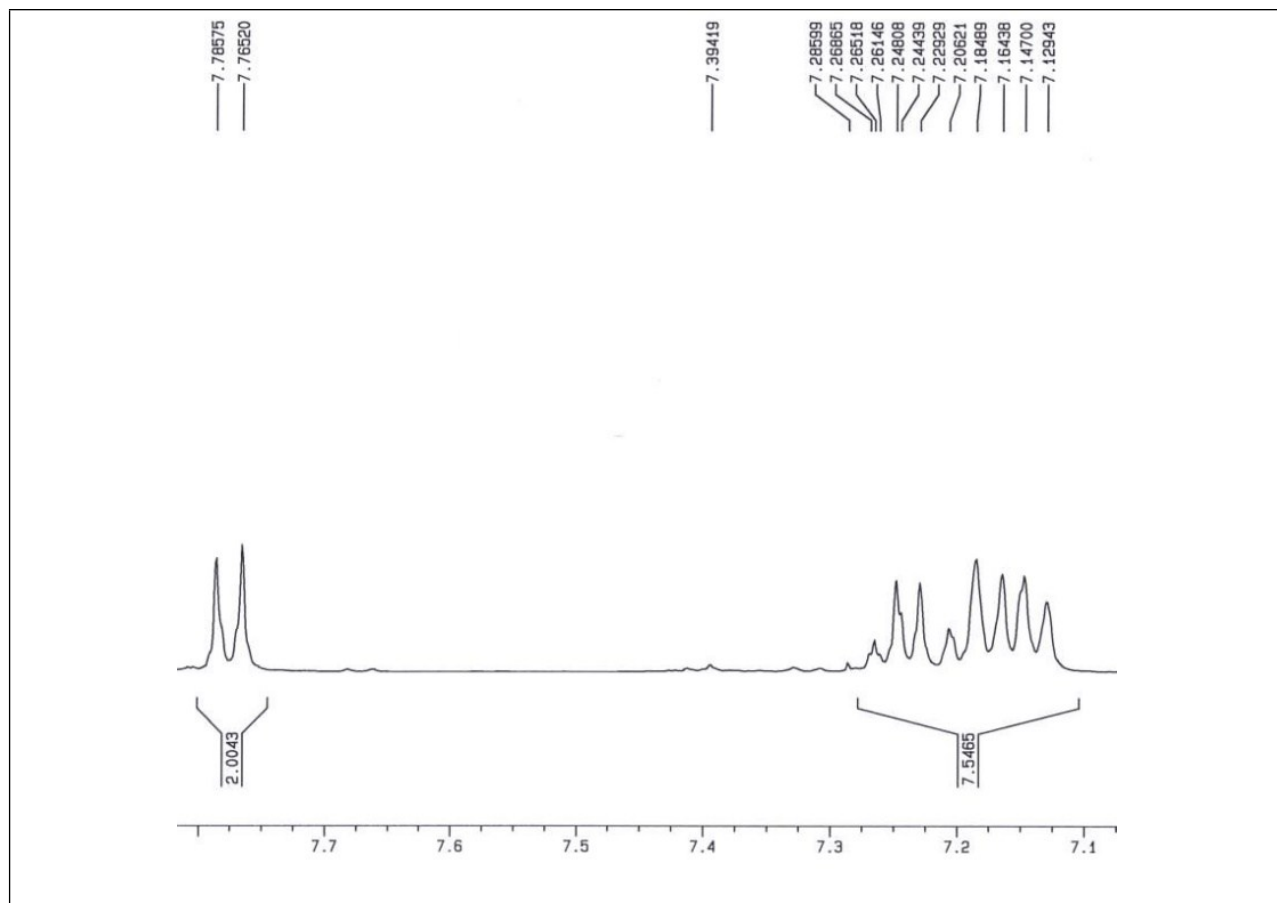

**Figure 66:** Expanded (1)  $^1\text{H}$  NMR spectrum (400 MHz) of compound **4k** in  $\text{CDCl}_3$ .

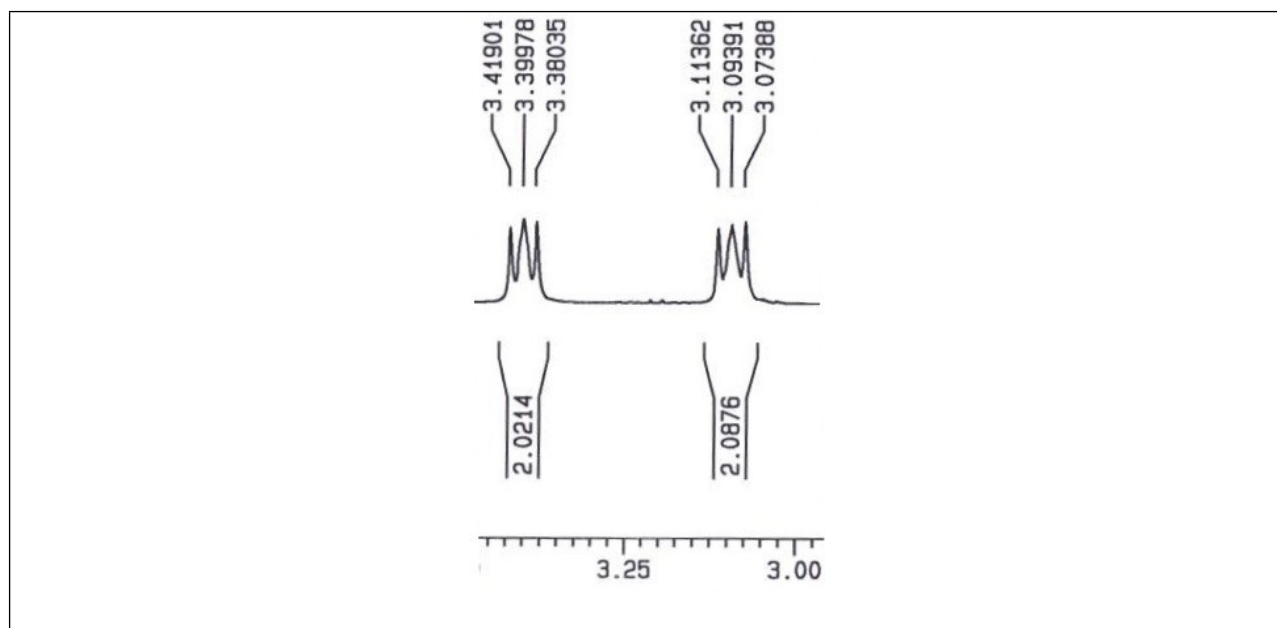

**Figure 67:** Expanded (2)  $^1\text{H}$  NMR spectrum (400 MHz) of compound **4k** in  $\text{CDCl}_3$ .

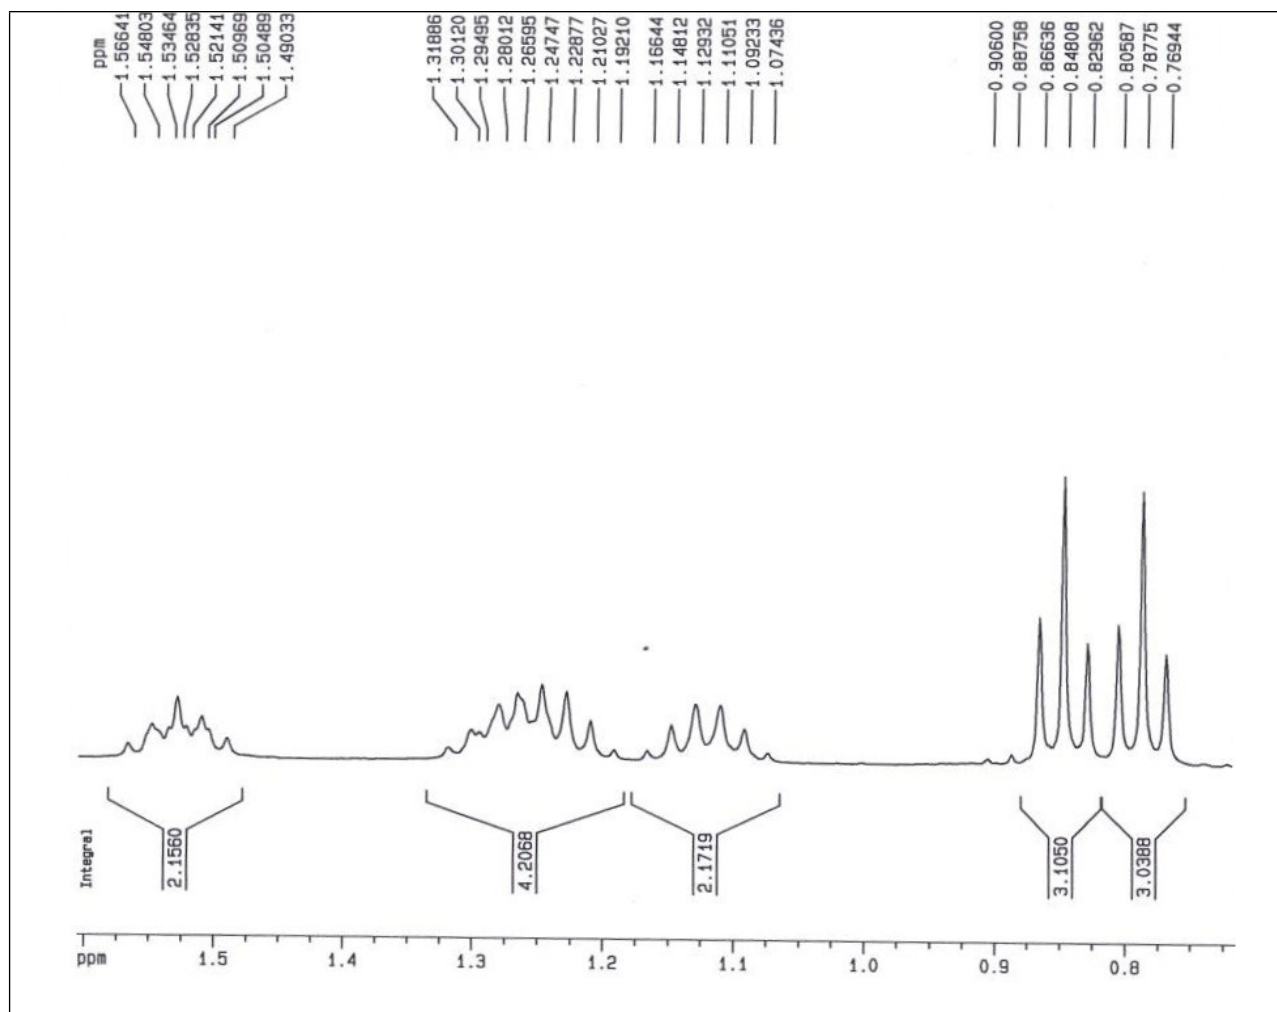

**Figure 68:** Expanded (3)  $^1\text{H}$  NMR spectrum (400 MHz) of compound **4k** in  $\text{CDCl}_3$ .

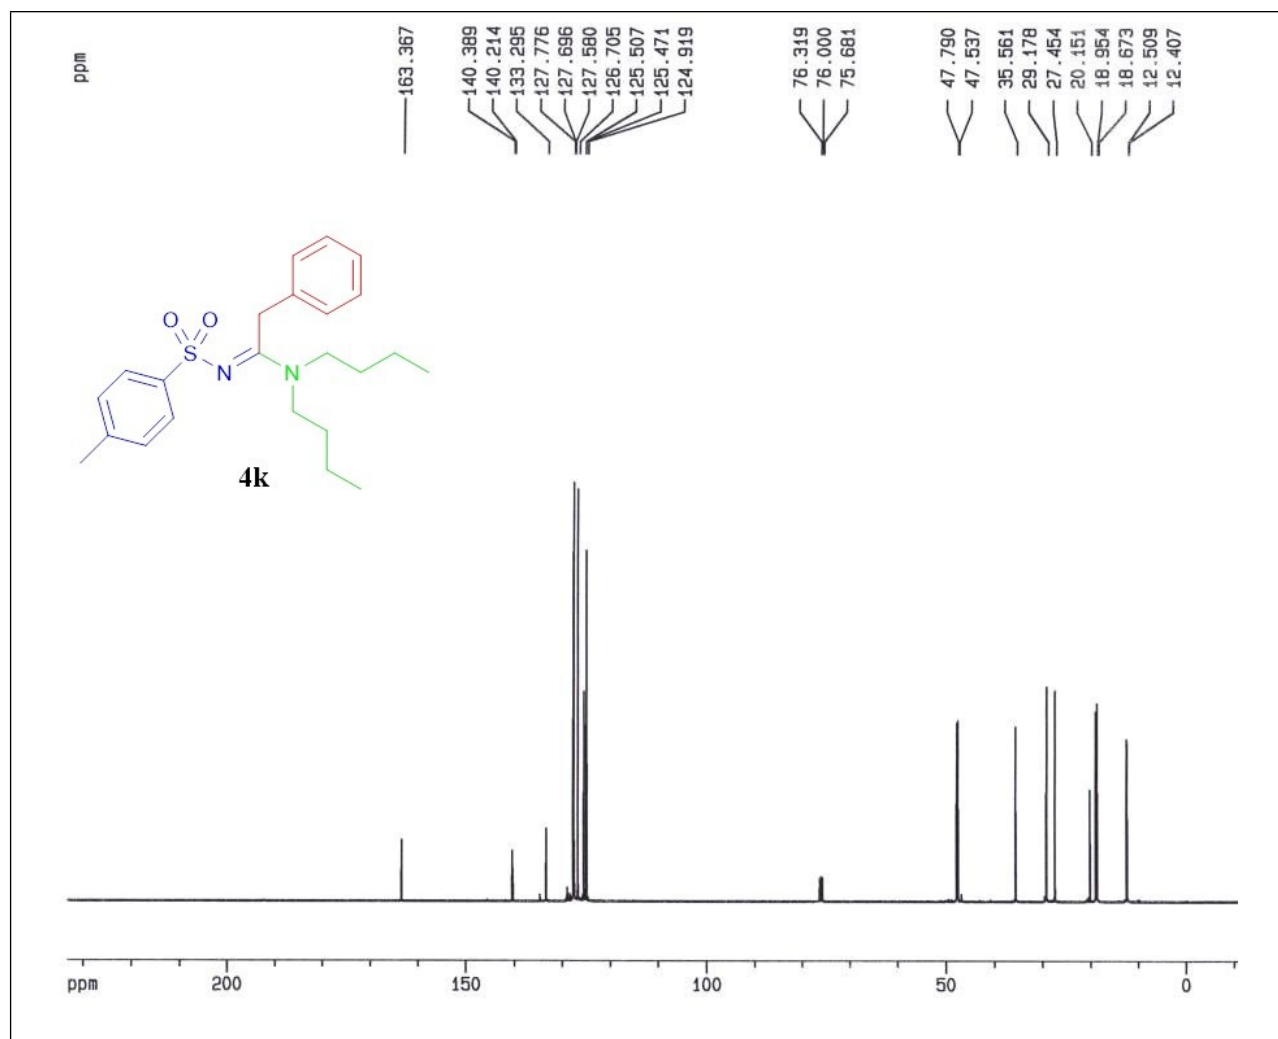

**Figure 69:** <sup>13</sup>C NMR spectrum (100 MHz) of compound **4k** in CDCl<sub>3</sub>.

For previous methods for synthesis of *N*<sup>1</sup>, *N*<sup>1</sup>-Dibutyl-*N*<sup>2</sup>-tosyl-2-phenylacetamide (**4k**), see reference **2**.

*N*<sup>1</sup>, *N*<sup>1</sup>-dibenzyl-*N*<sup>2</sup>-(4-methylbenzenesulfonyl)-2-phenylacetamide (**41**):

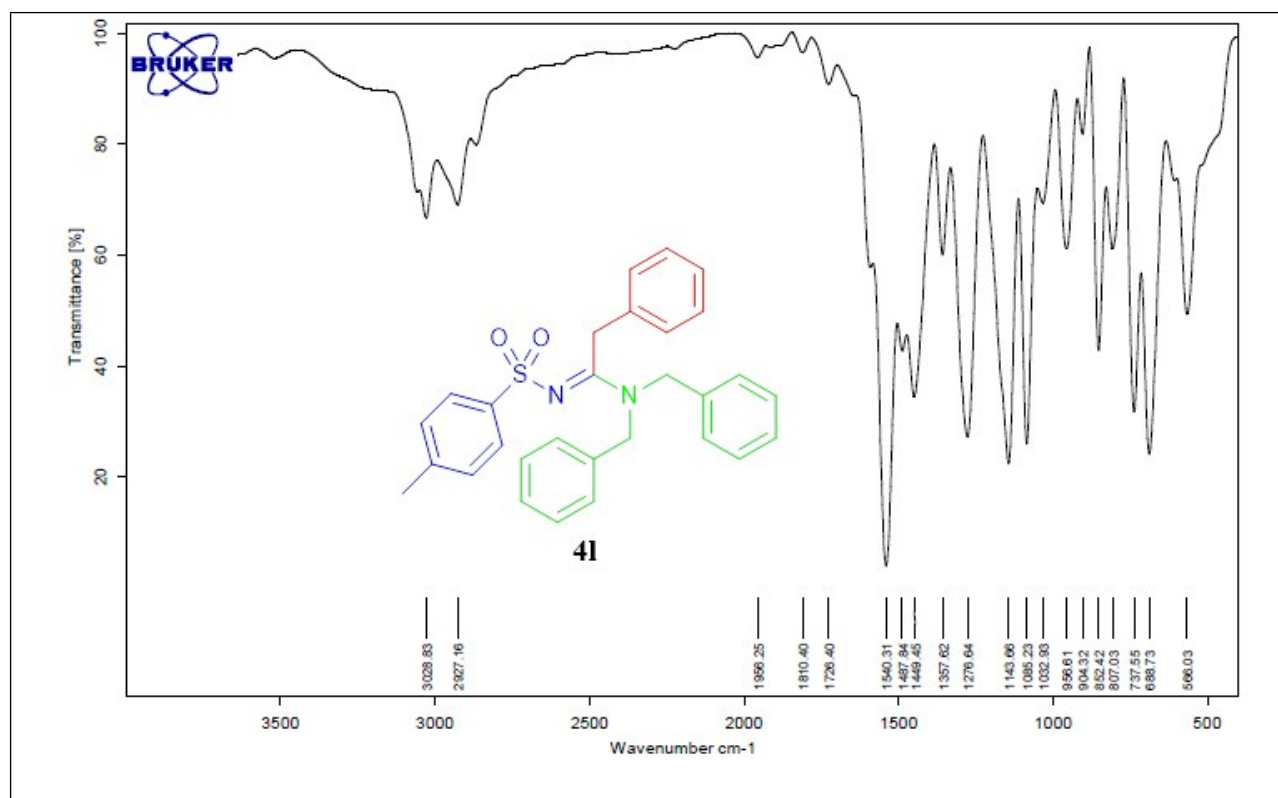

**Figure 70:** FTIR spectrum (KBr) of compound **41**.

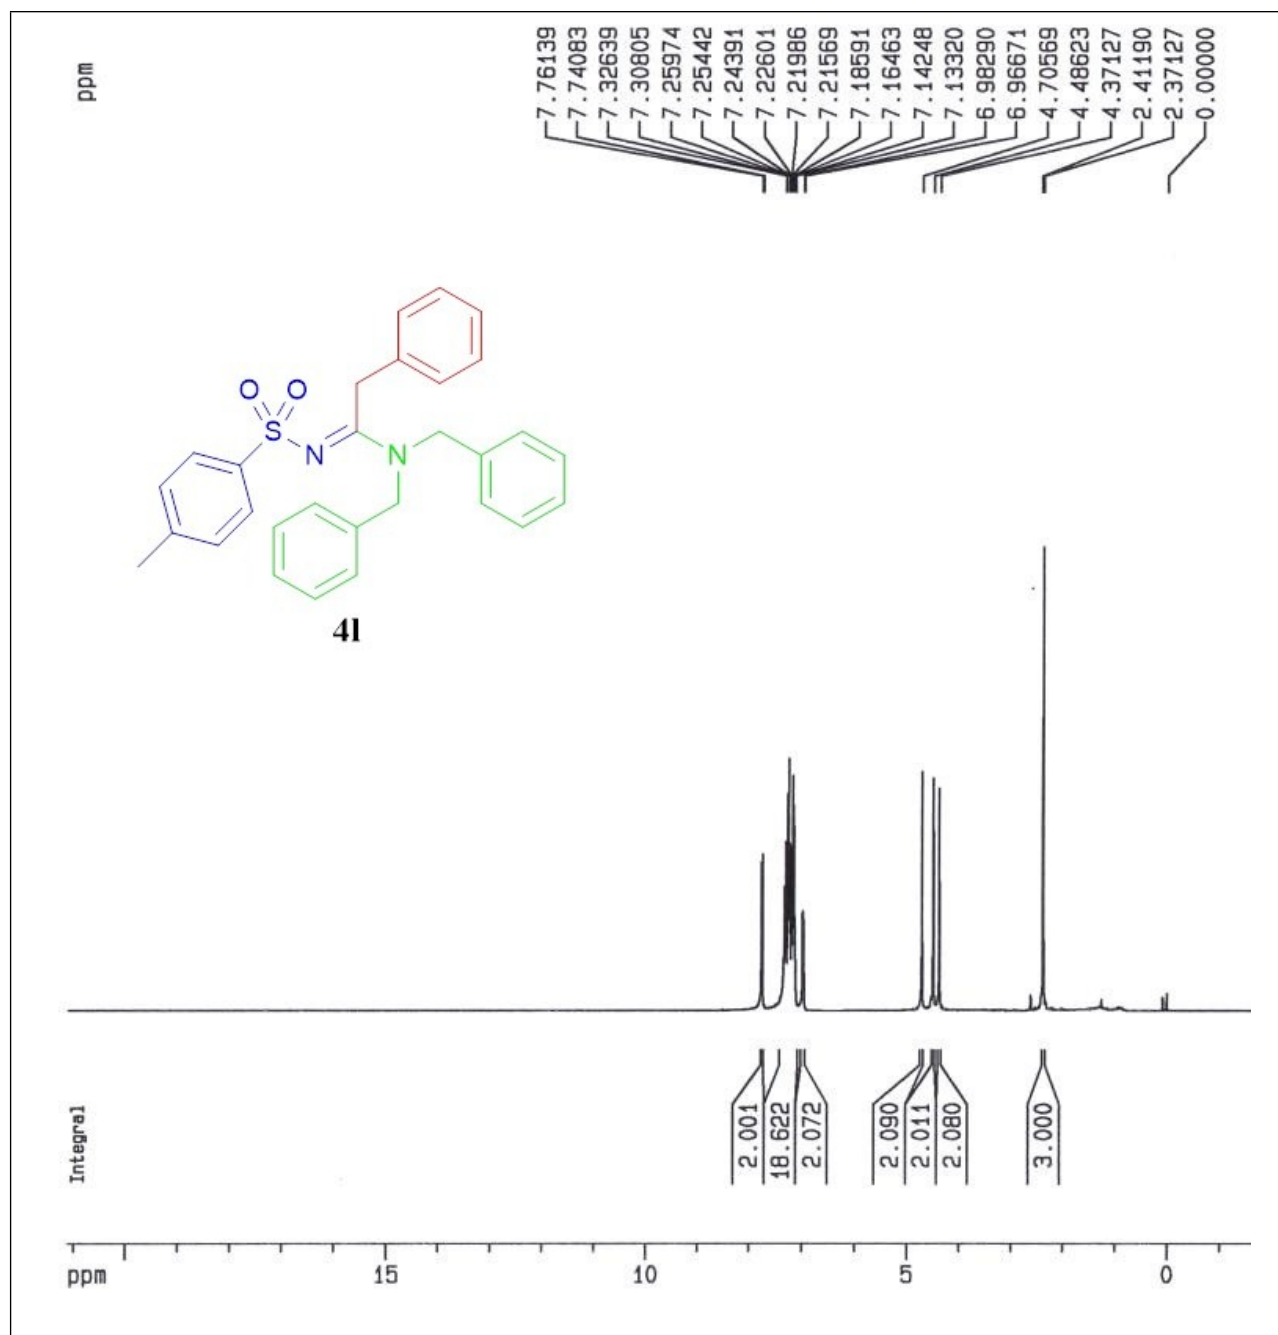

Figure 71: <sup>1</sup>H NMR spectrum (400 MHz) of compound **4I** in CDCl<sub>3</sub>.

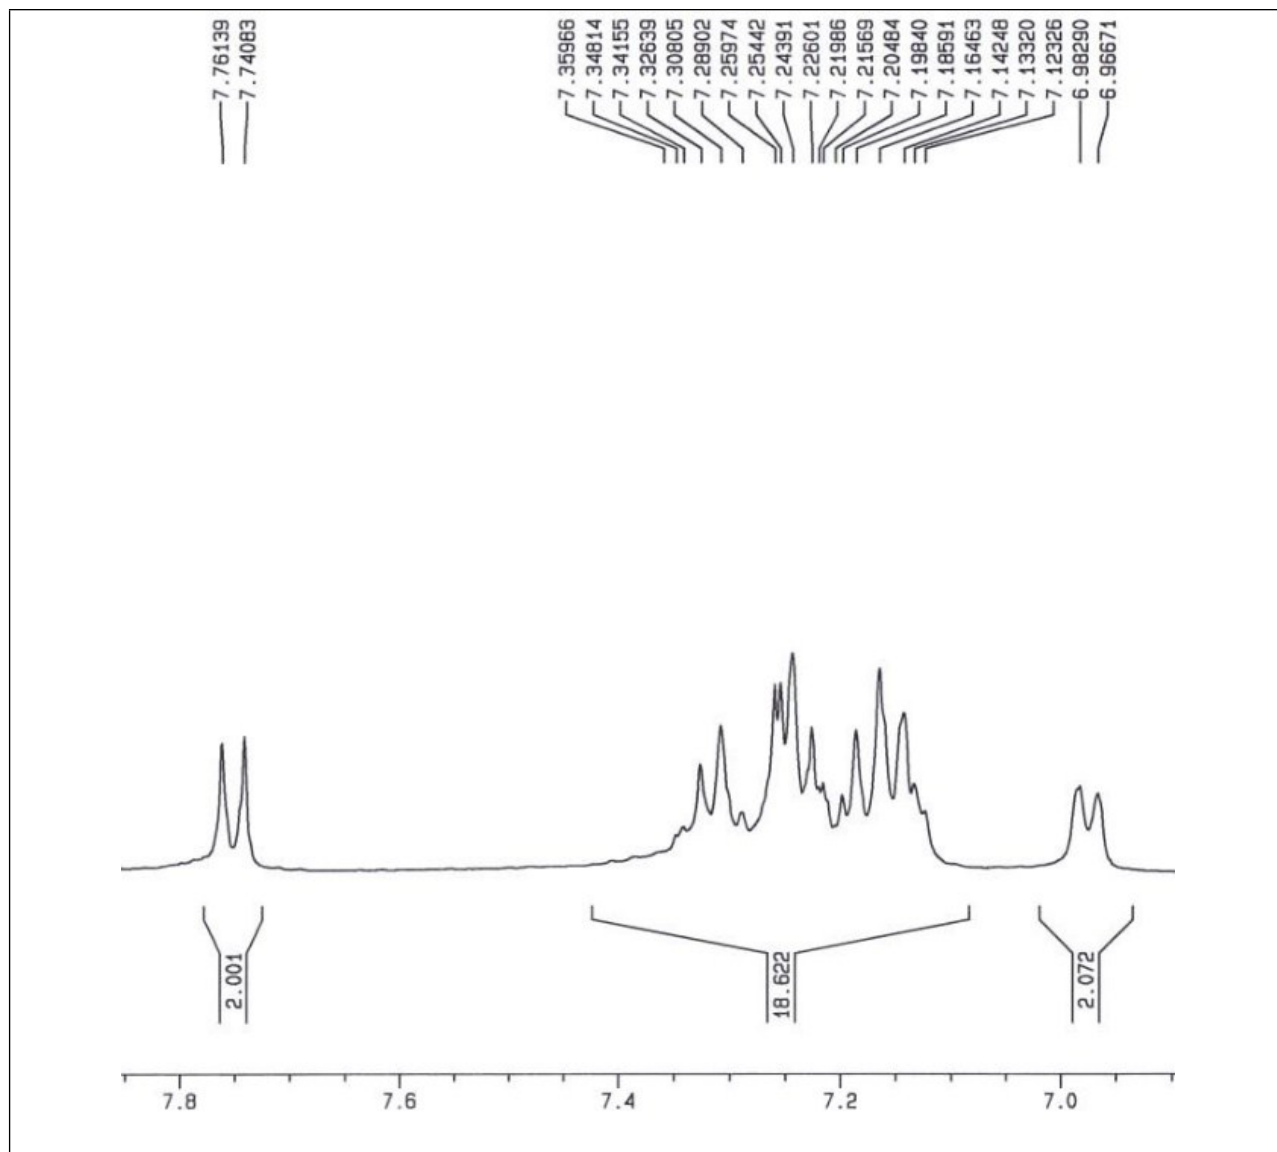

**Figure 72:** Expanded  $^1\text{H}$  NMR spectrum (400 MHz) of compound **4I** in  $\text{CDCl}_3$ .

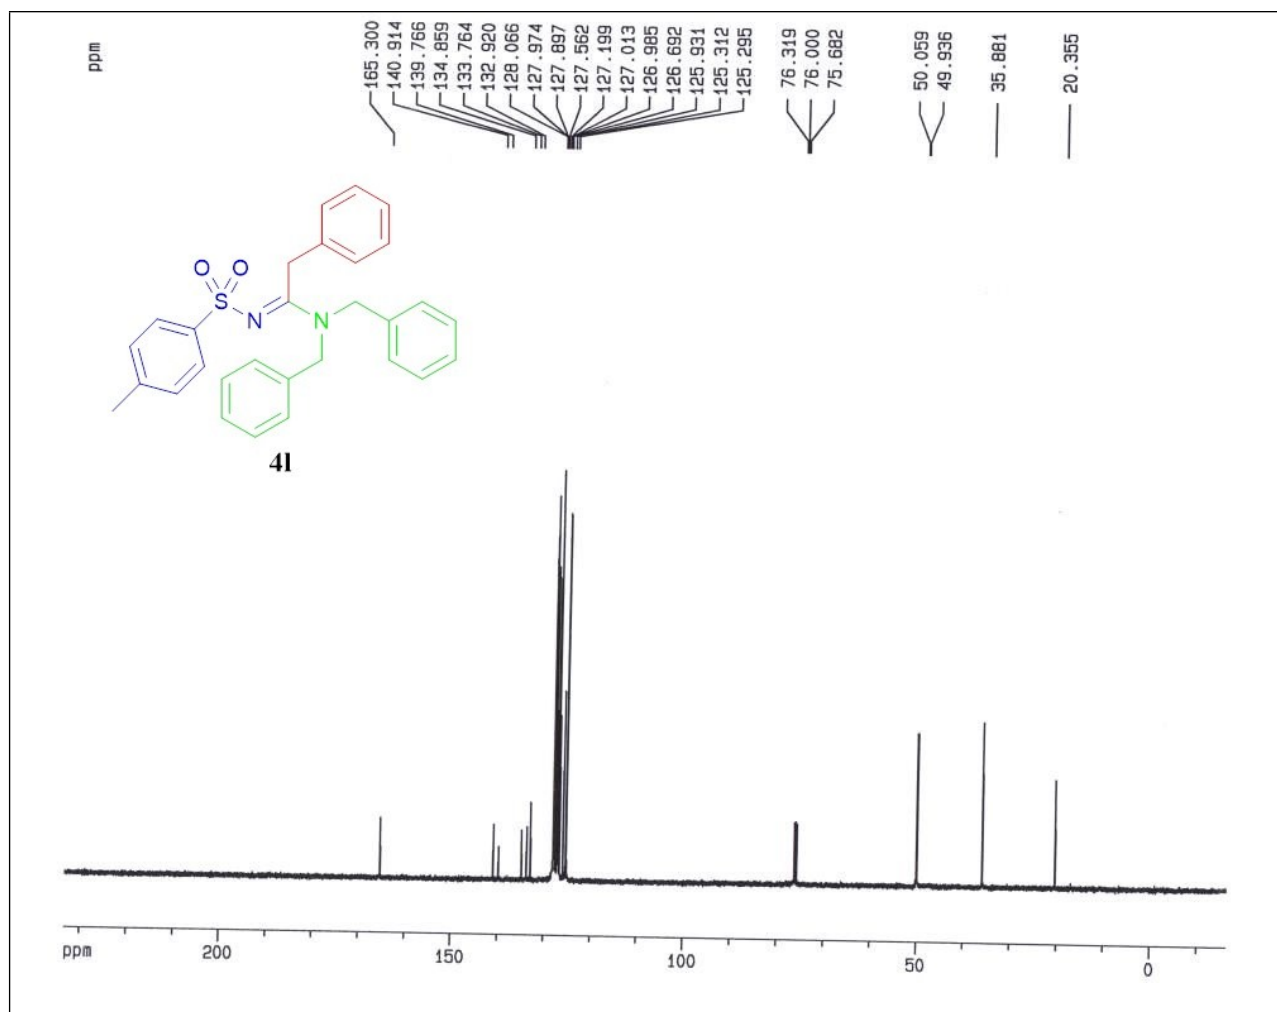

**Figure 73:** <sup>13</sup>C NMR spectrum (100 MHz) of compound **4I** in CDCl<sub>3</sub>.

*N*<sup>1</sup>, *N*<sup>1</sup>-dibenzyl-*N*<sup>2</sup>-(phenylsulfonyl)-2-phenylacetamide (**4m**):

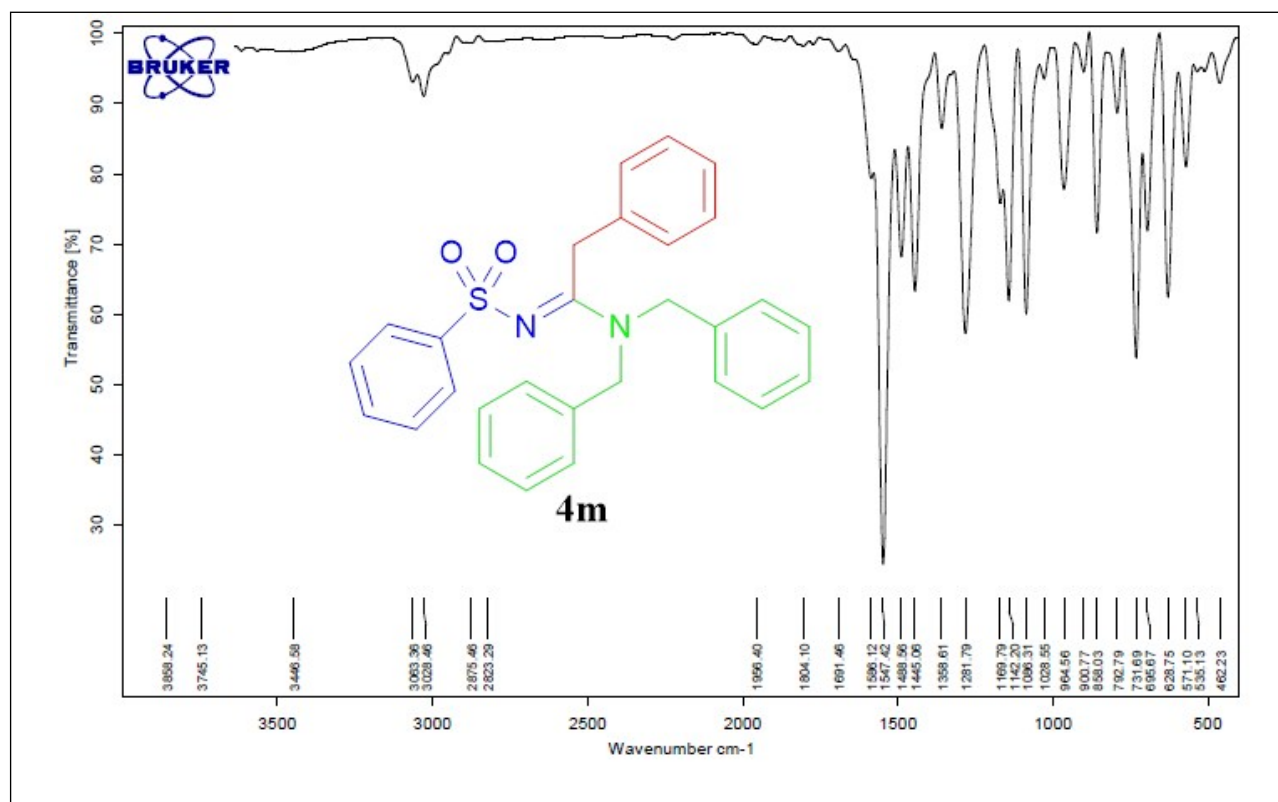

Figure 74: FTIR spectrum (KBr) compound **4m**.



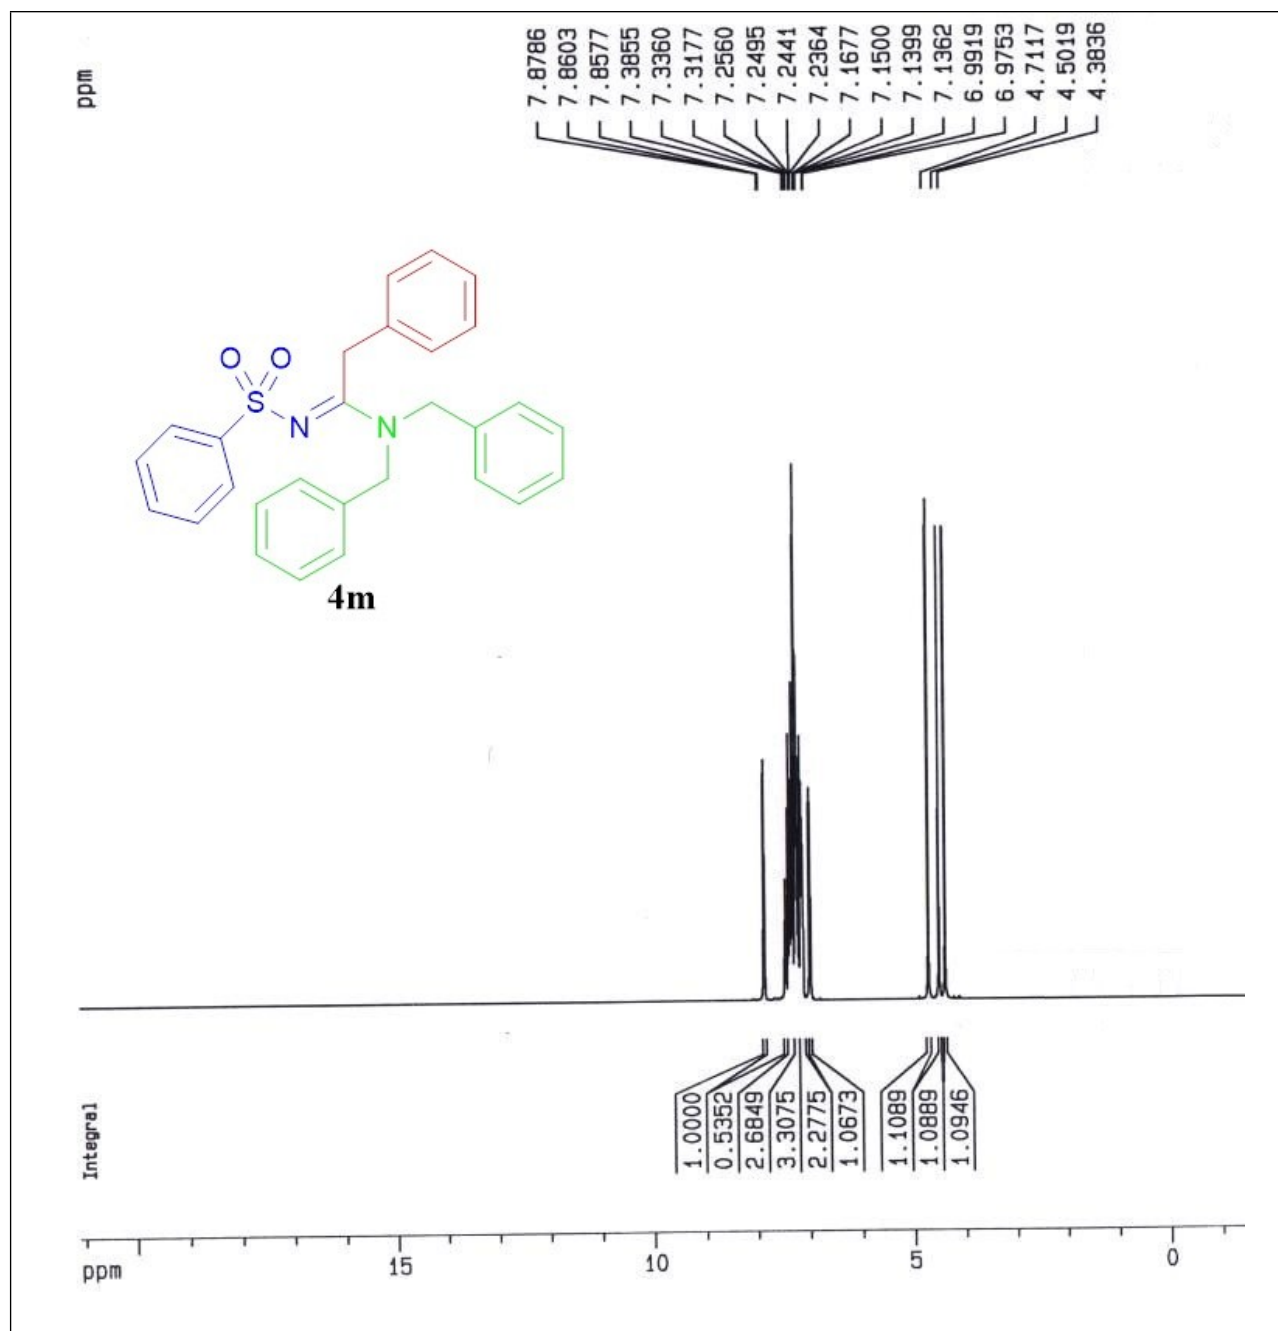

**Figure 75:** <sup>1</sup>H NMR spectrum (400 MHz) of compound **4m** in CDCl<sub>3</sub>.

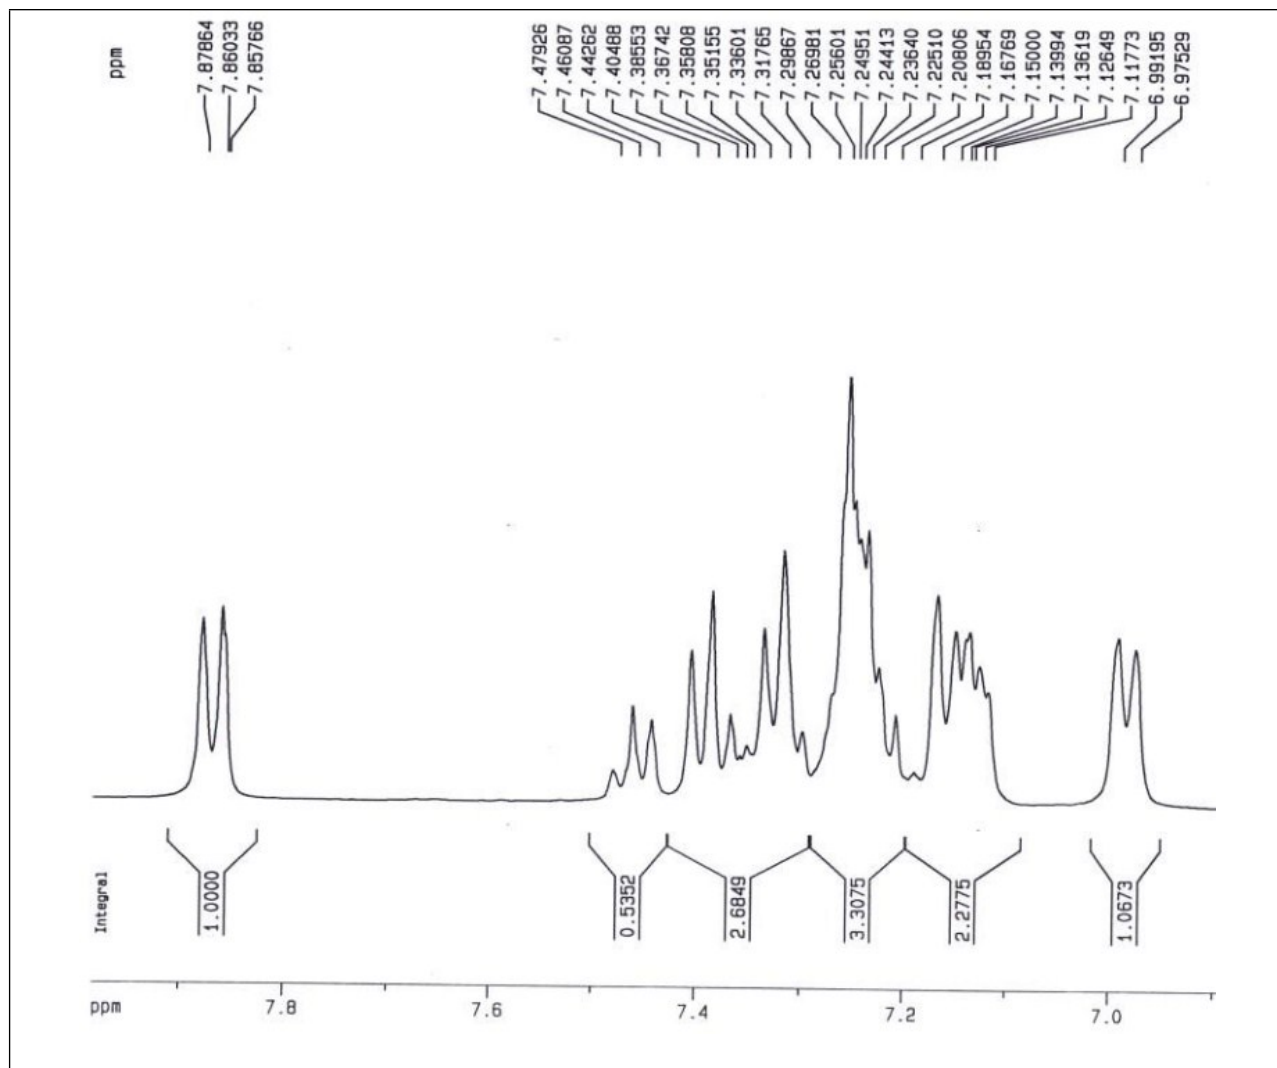

**Figure 76:** Expanded  $^1\text{H}$  NMR spectrum (400 MHz) of compound **4m** in  $\text{CDCl}_3$ .

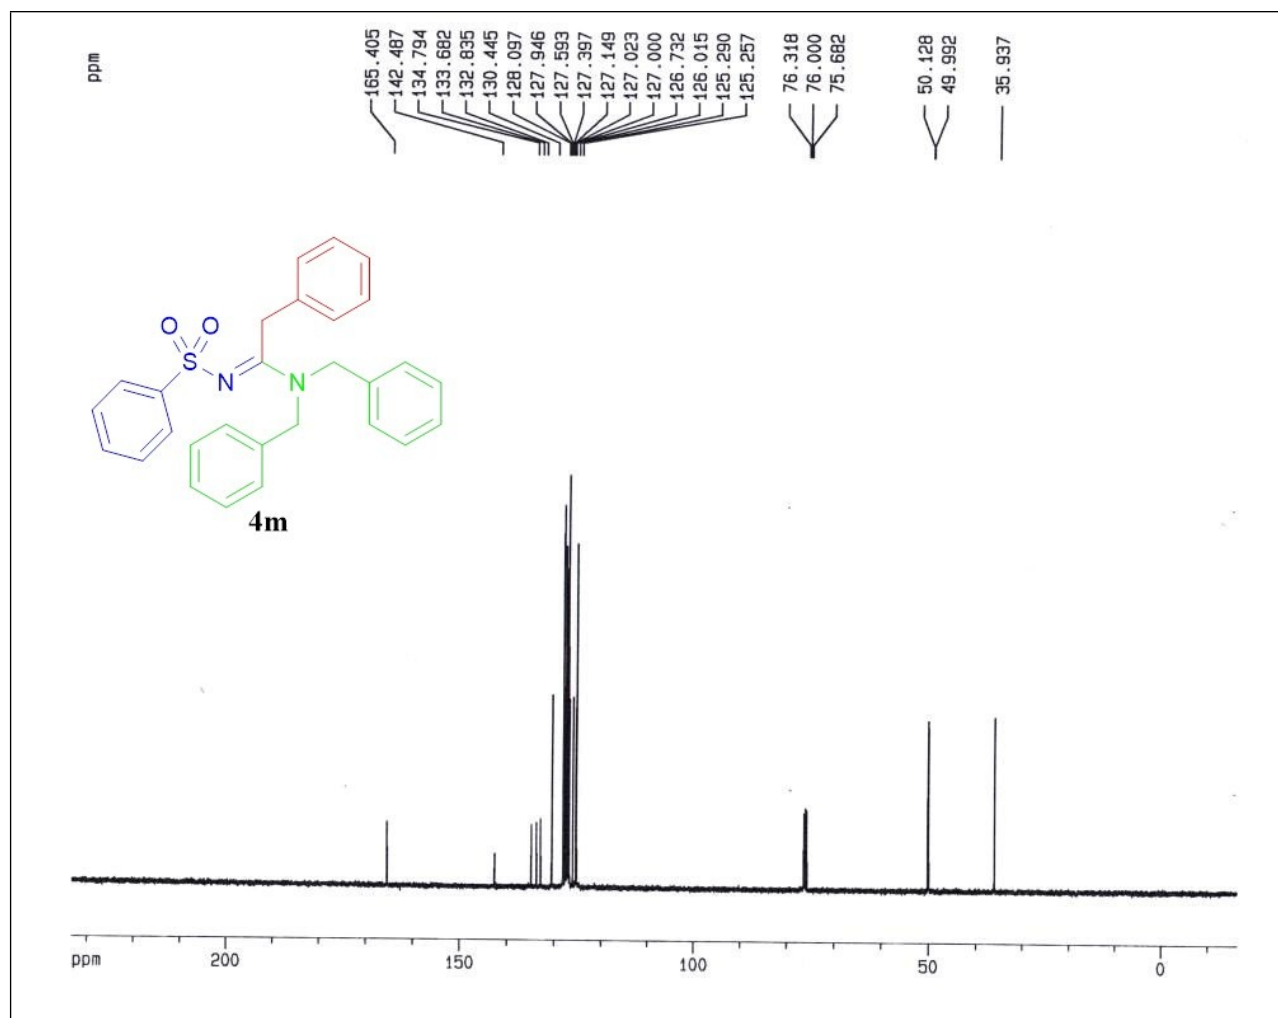

**Figure 77:** <sup>13</sup>C NMR spectrum (100 MHz) of compound **4m** in CDCl<sub>3</sub>.

*N*<sup>1</sup>, *N*<sup>1</sup>-Dibenzyl-*N*<sup>2</sup>-(methylsulfonyl)-2-phenylacetamide (**4n**):

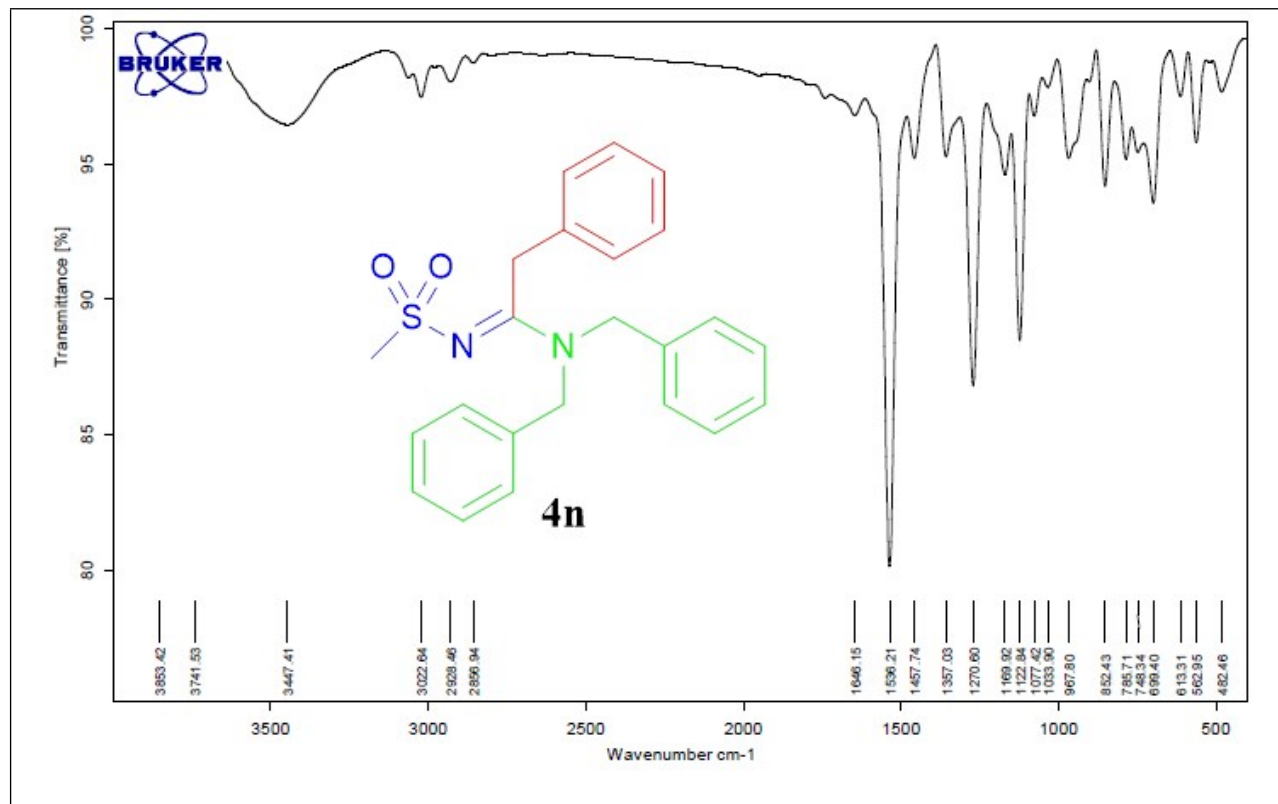

**Figure 78:** FTIR spectrum (KBr) of compound **4n**.

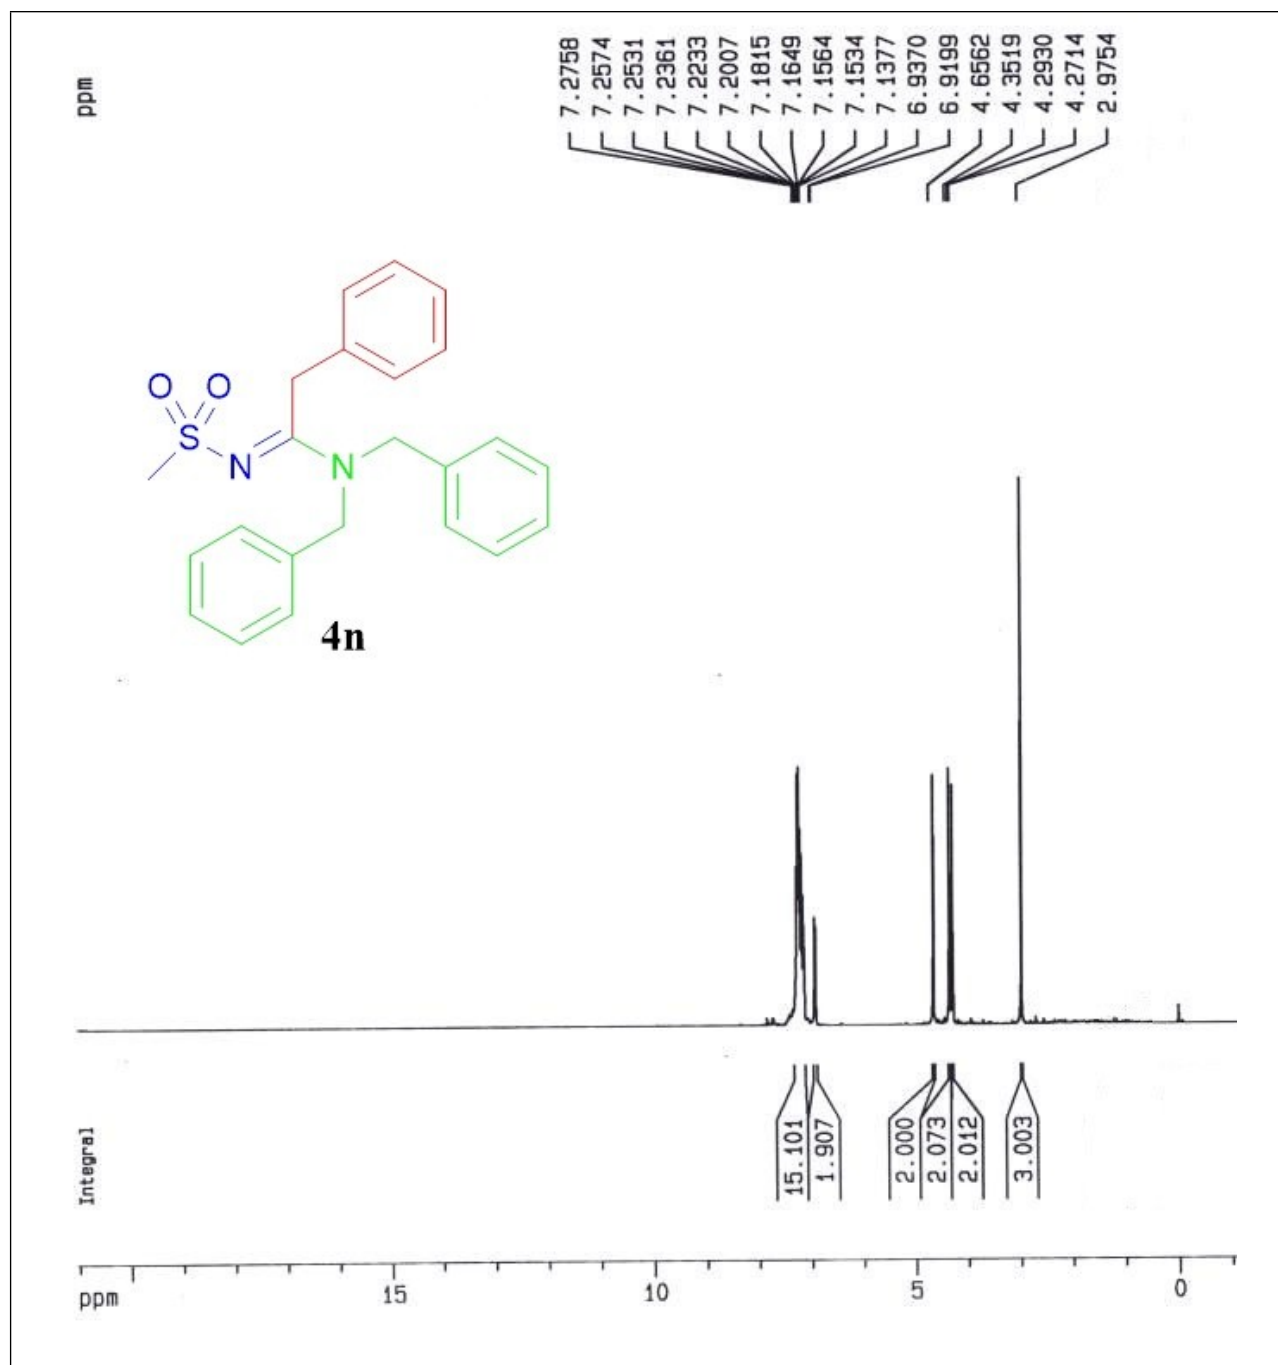

Figure 79: <sup>1</sup>H NMR spectrum (400 MHz) of compound **4n** in CDCl<sub>3</sub>.

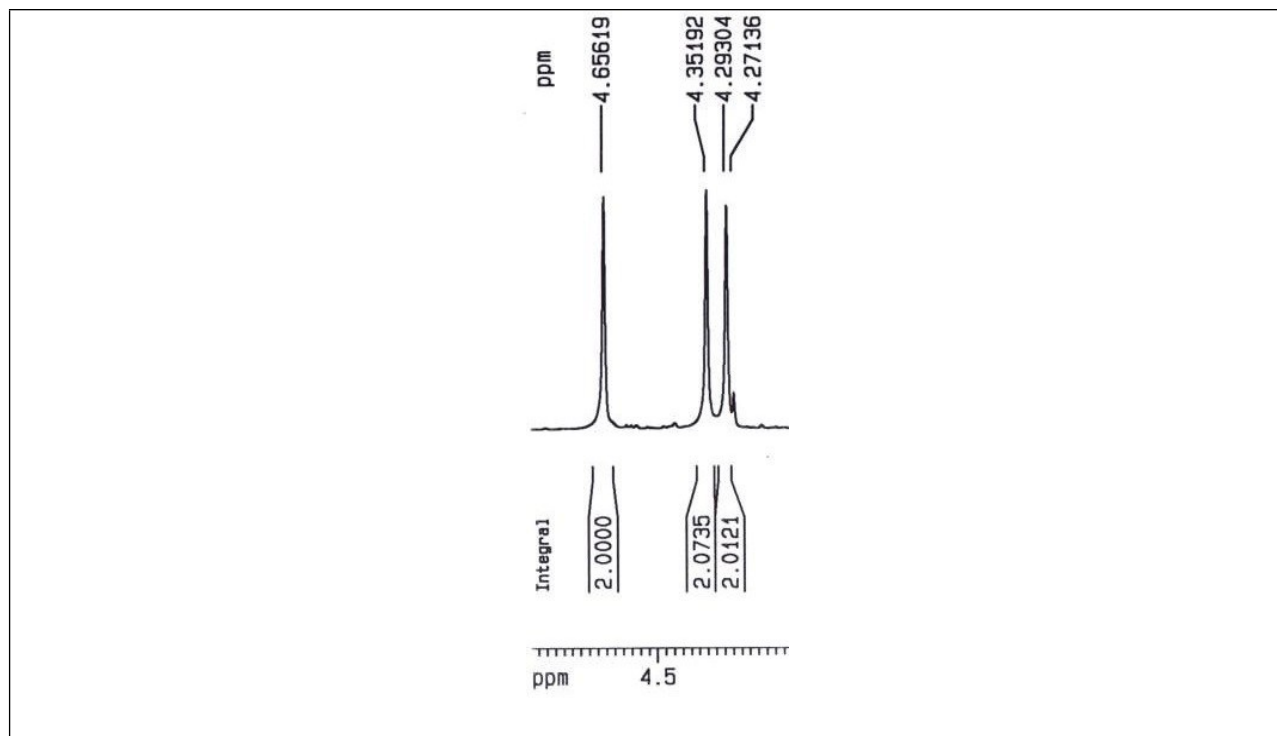

**Figure 80:** Expanded (1)  $^1\text{H}$  NMR spectrum (400 MHz) of compound **4n** in  $\text{CDCl}_3$ .

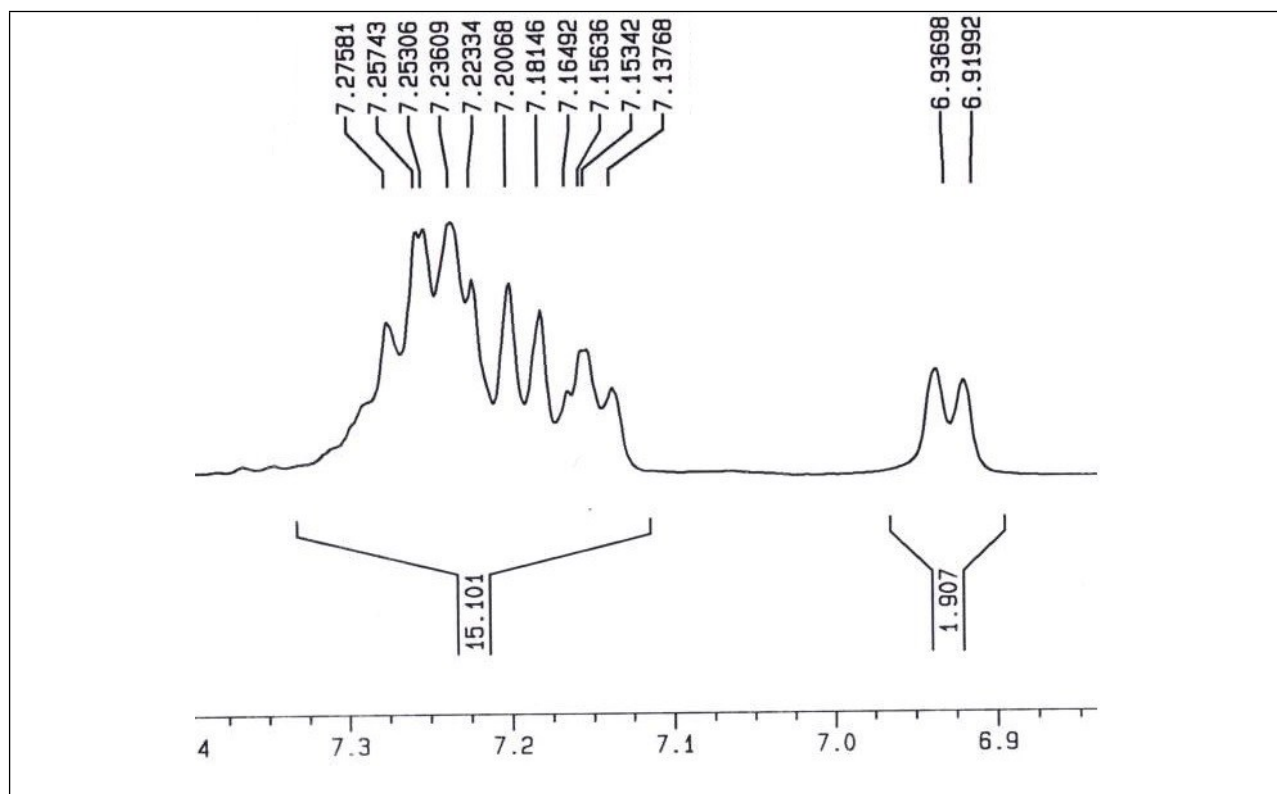

**Figure 81:** Expanded (2)  $^1\text{H}$  NMR spectrum (400 MHz) of compound **4n** in  $\text{CDCl}_3$ .

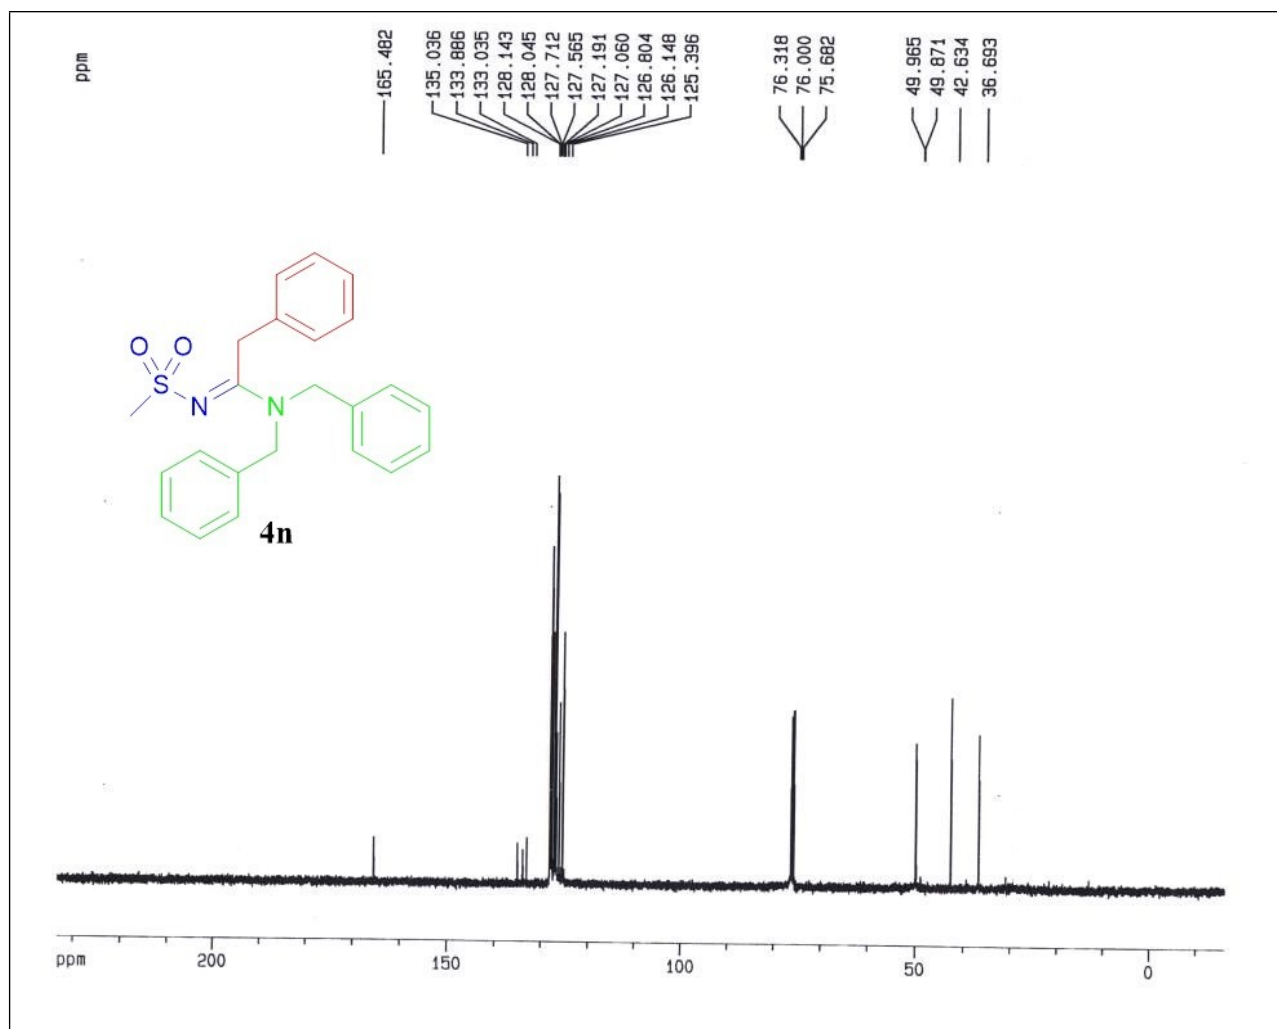

**Figure 82:**  $^{13}\text{C}$  NMR spectrum (100 MHz) of compound **4n** in  $\text{CDCl}_3$ .

*N*<sup>1</sup>, *N*<sup>1</sup>-Dibenzyl-*N*<sup>2</sup>-(4-methylbenzenesulfonyl)-pentanamidine (**4o**):

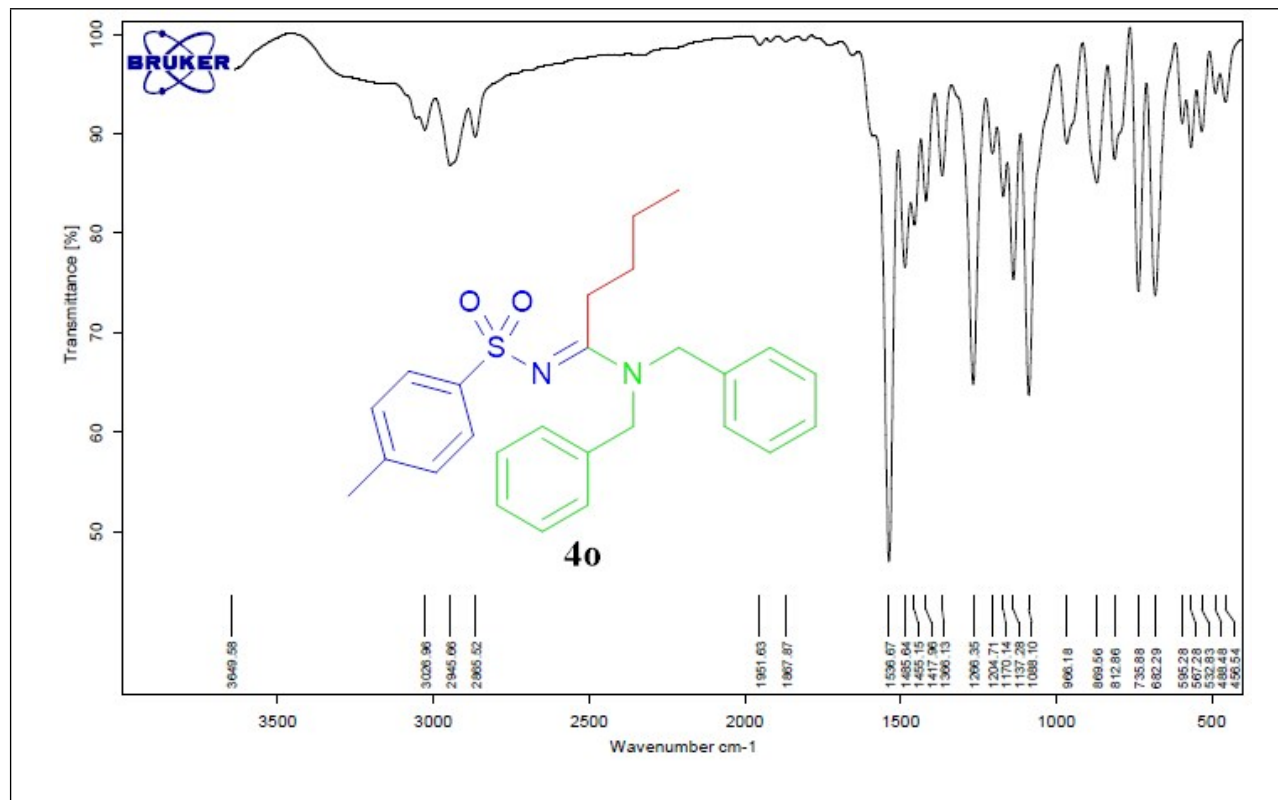

**Figure 83:** FTIR spectrum (KBr) of compound **4o**.



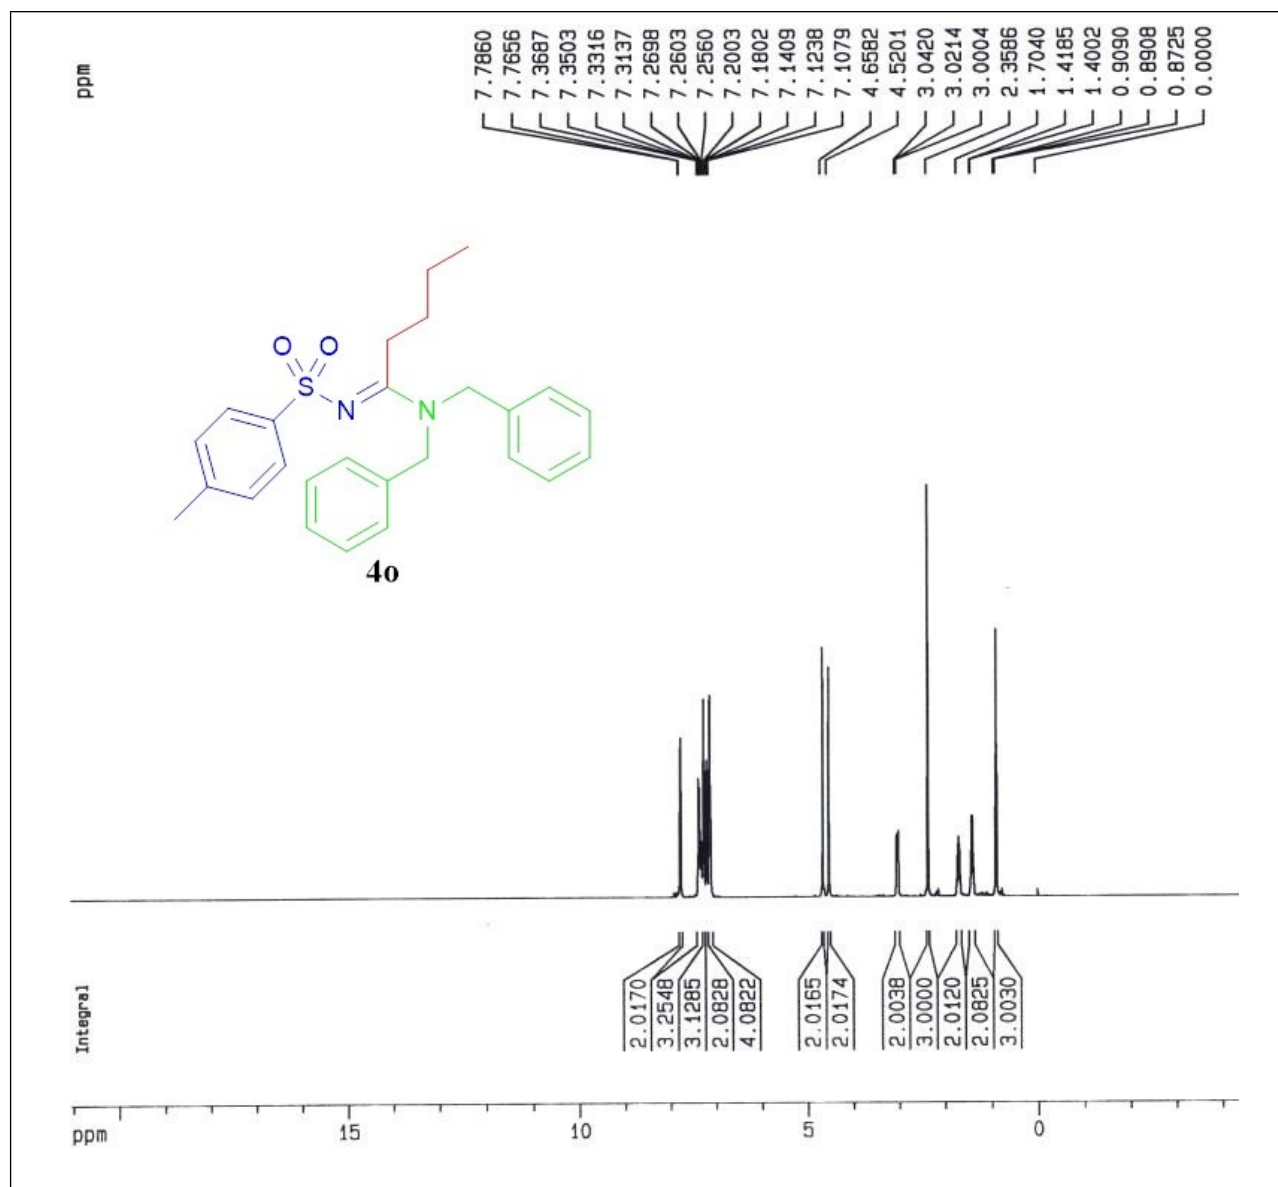

**Figure 84:** <sup>1</sup>H NMR spectrum (400 MHz) of compound **4o** in CDCl<sub>3</sub>.

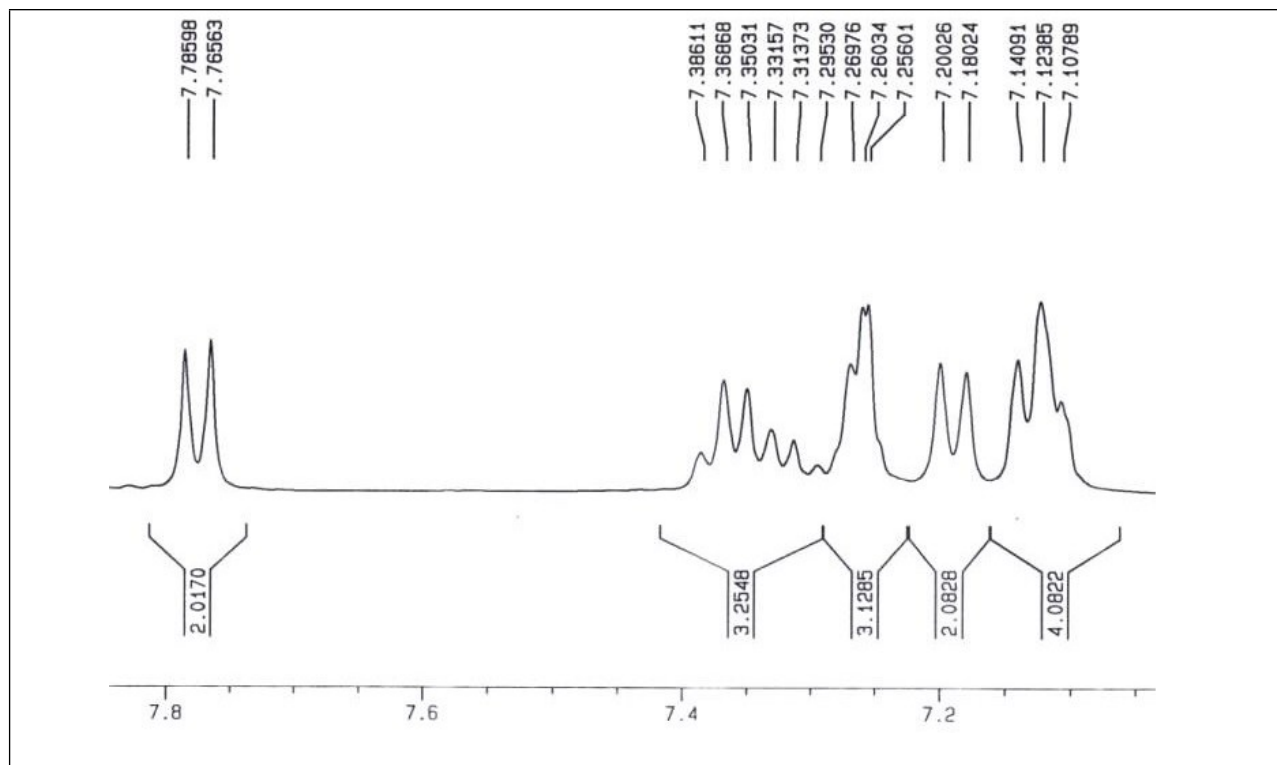

**Figure 85:** Expanded (1)  $^1\text{H}$  NMR spectrum (400 MHz) of compound **4o** in  $\text{CDCl}_3$ .

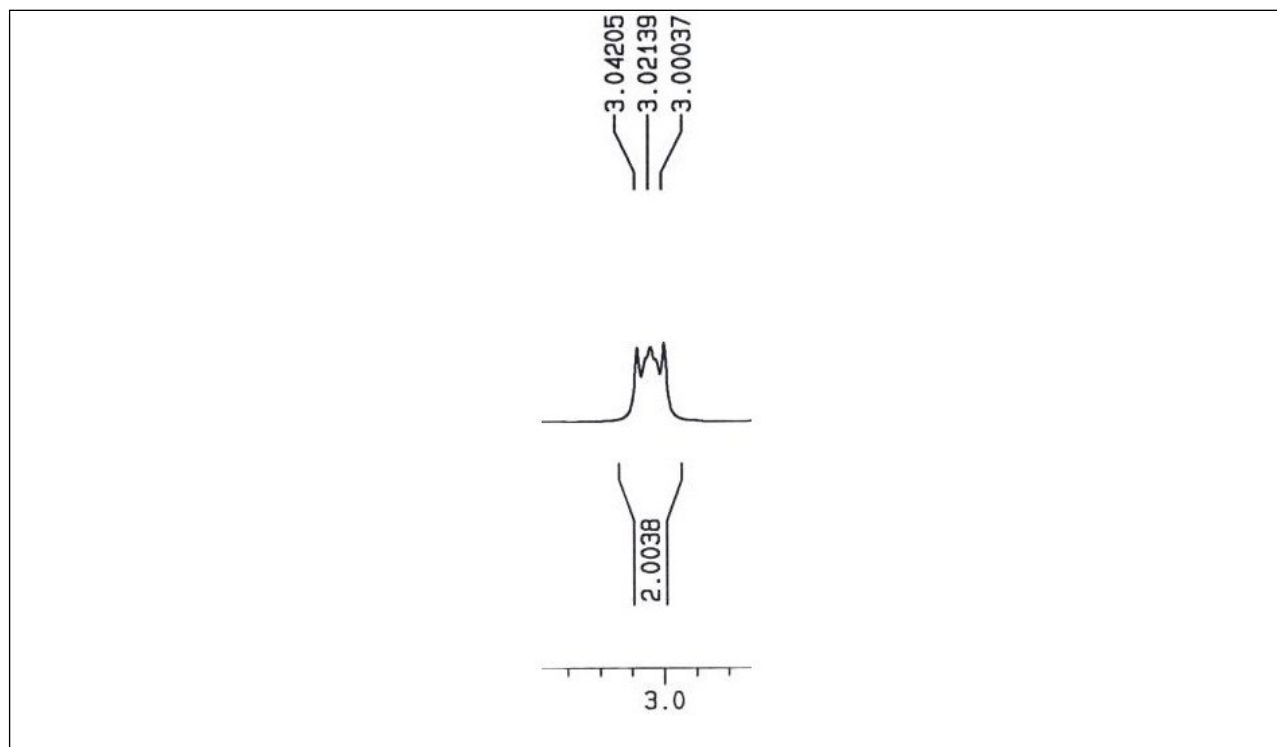

**Figure 86:** Expanded (2)  $^1\text{H}$  NMR spectrum (400 MHz) of compound **4o** in  $\text{CDCl}_3$ .

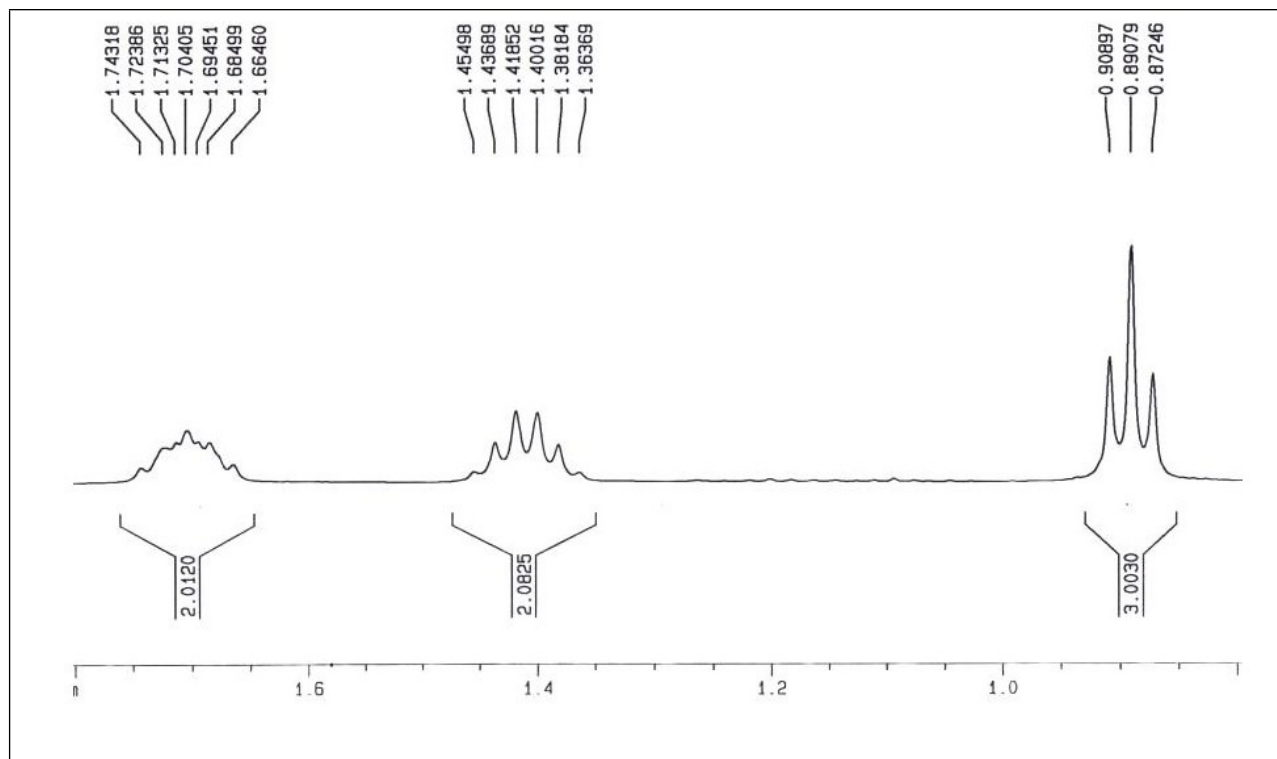

**Figure 87:** Expanded (3)  $^1\text{H}$  NMR spectrum (400 MHz) of compound **4o** in  $\text{CDCl}_3$ .

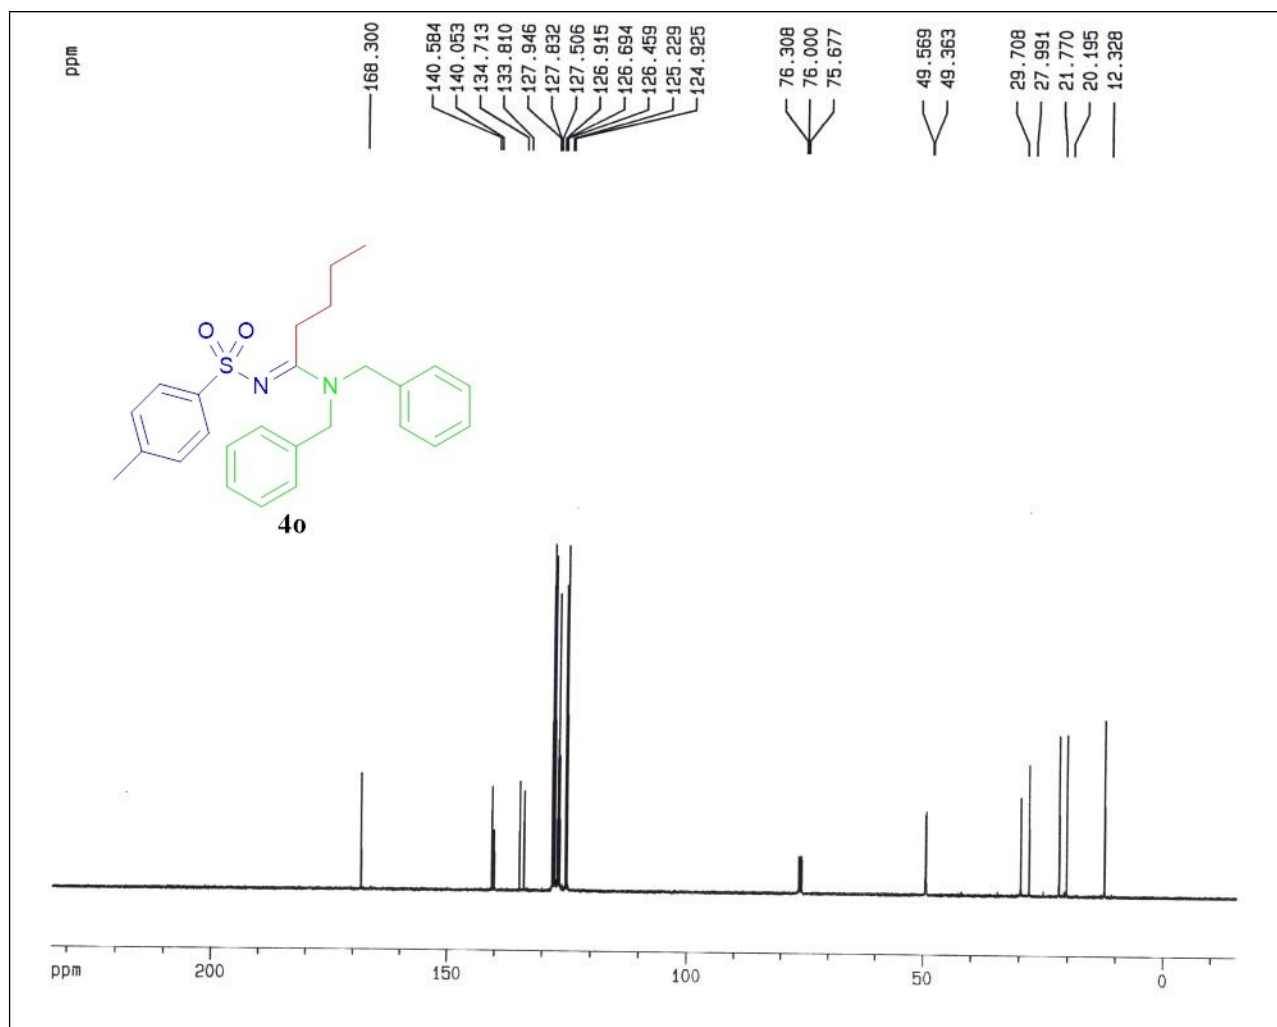

**Figure 88:**  $^{13}\text{C}$  NMR spectrum (100 MHz) of compound **4o** in  $\text{CDCl}_3$ .

*N*<sup>1</sup>, *N*<sup>1</sup>-Diphenyl-*N*<sup>2</sup>-tosyl-2-phenylacetamide (**4p**):

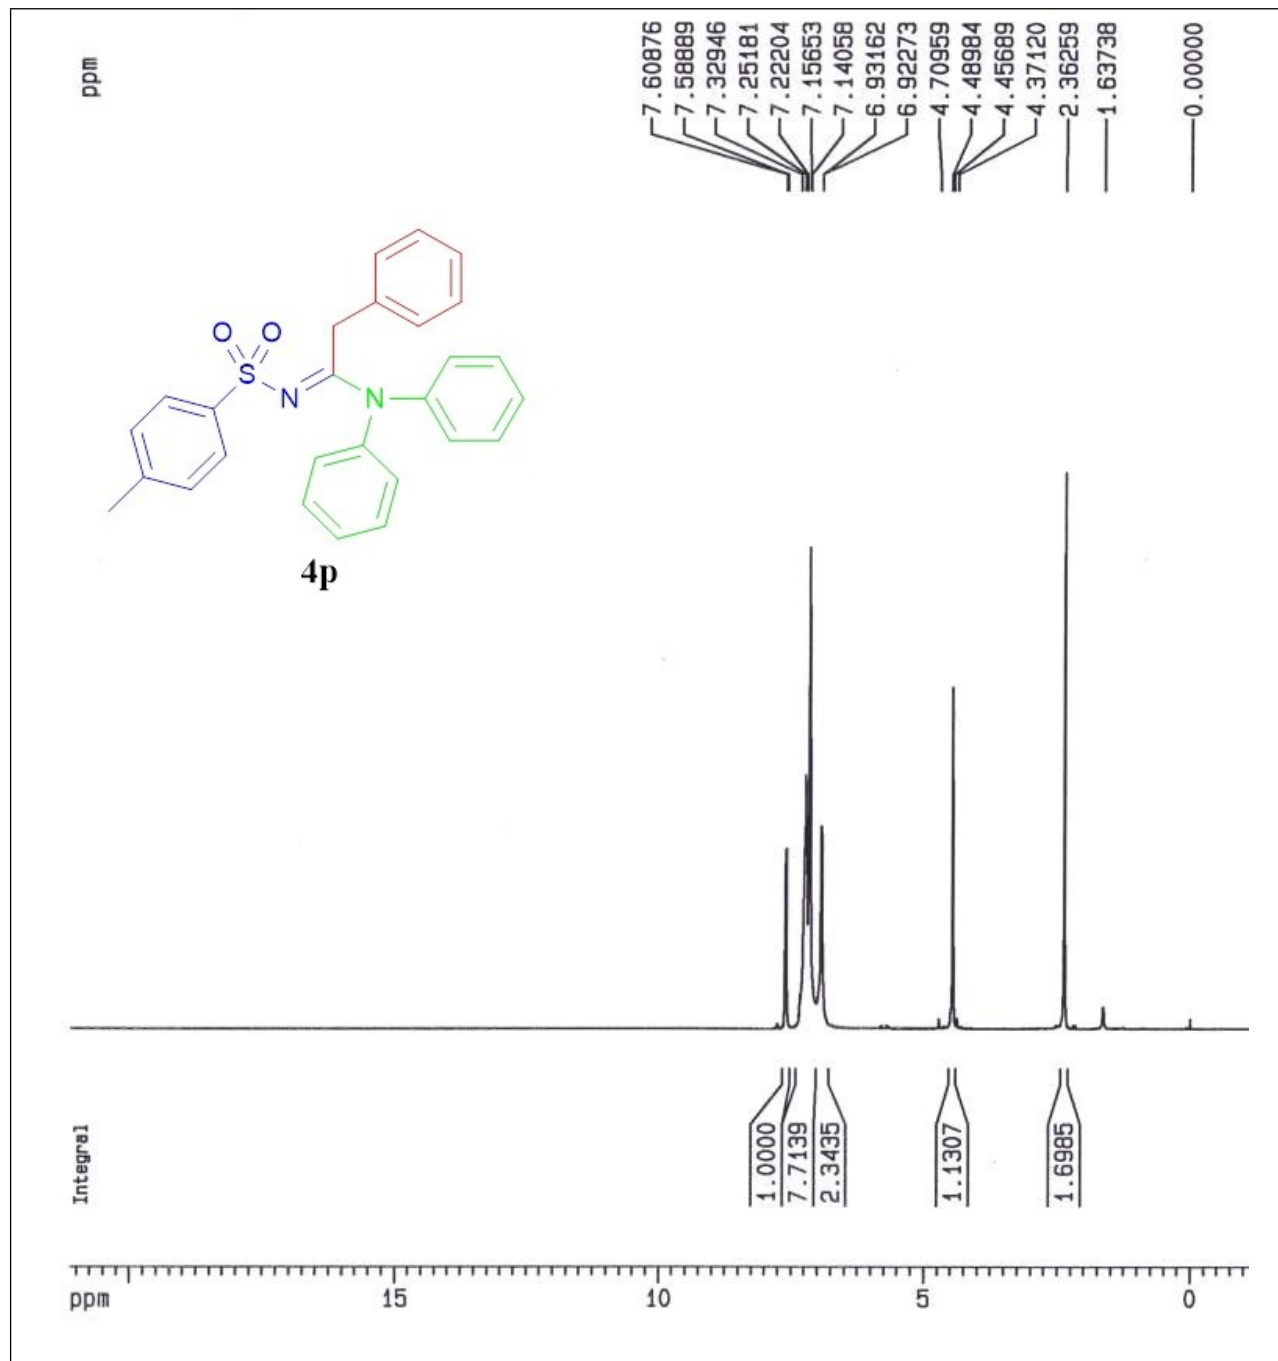

**Figure 89:** <sup>1</sup>H NMR spectrum (400 MHz) of compound **4p** in CDCl<sub>3</sub>.

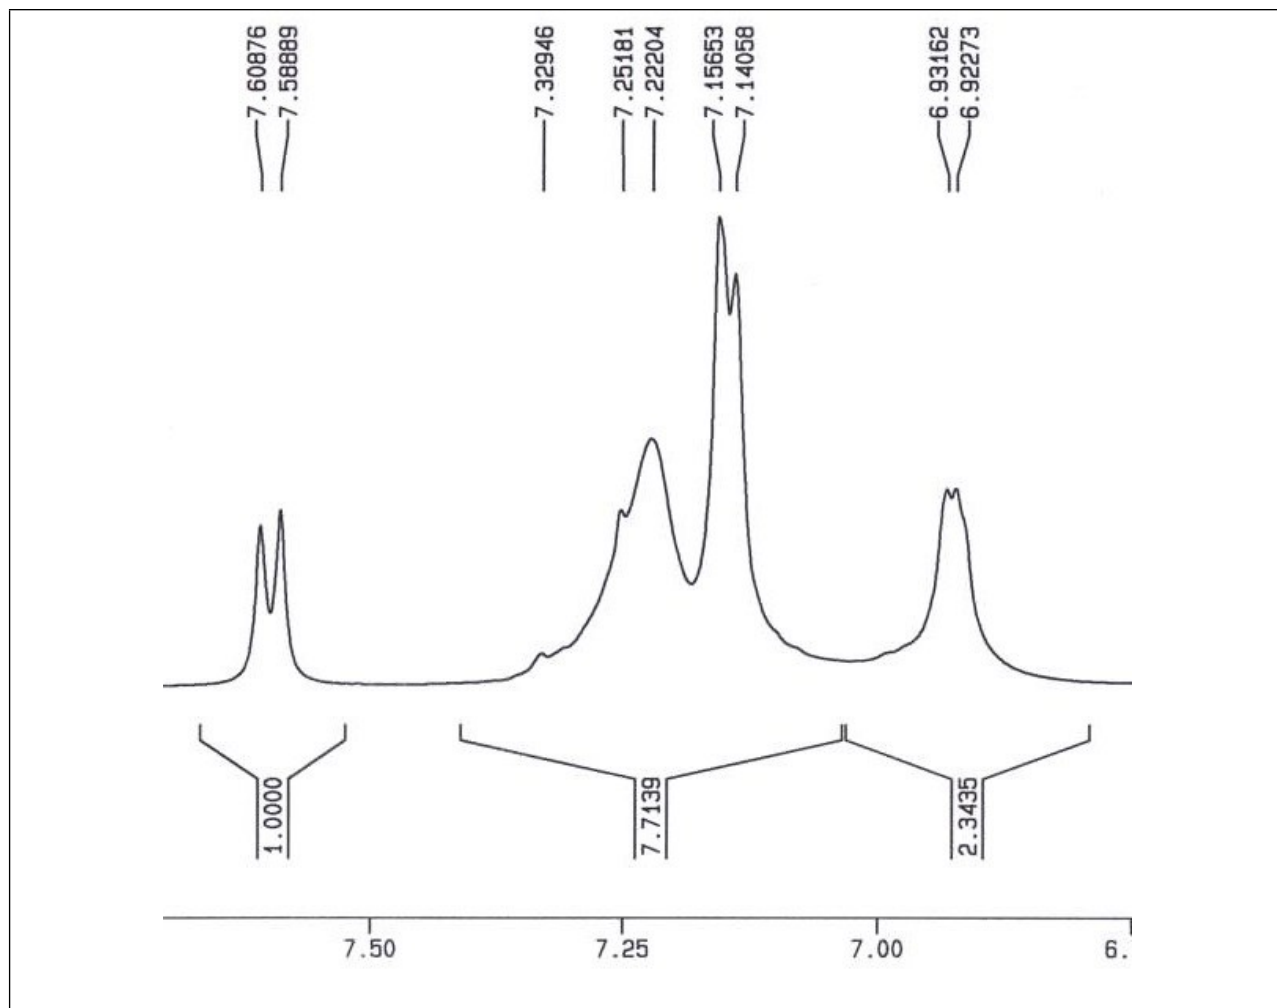

**Figure 90:** Expanded <sup>1</sup>H NMR spectrum (400 MHz) of compound **4p** in CDCl<sub>3</sub>.

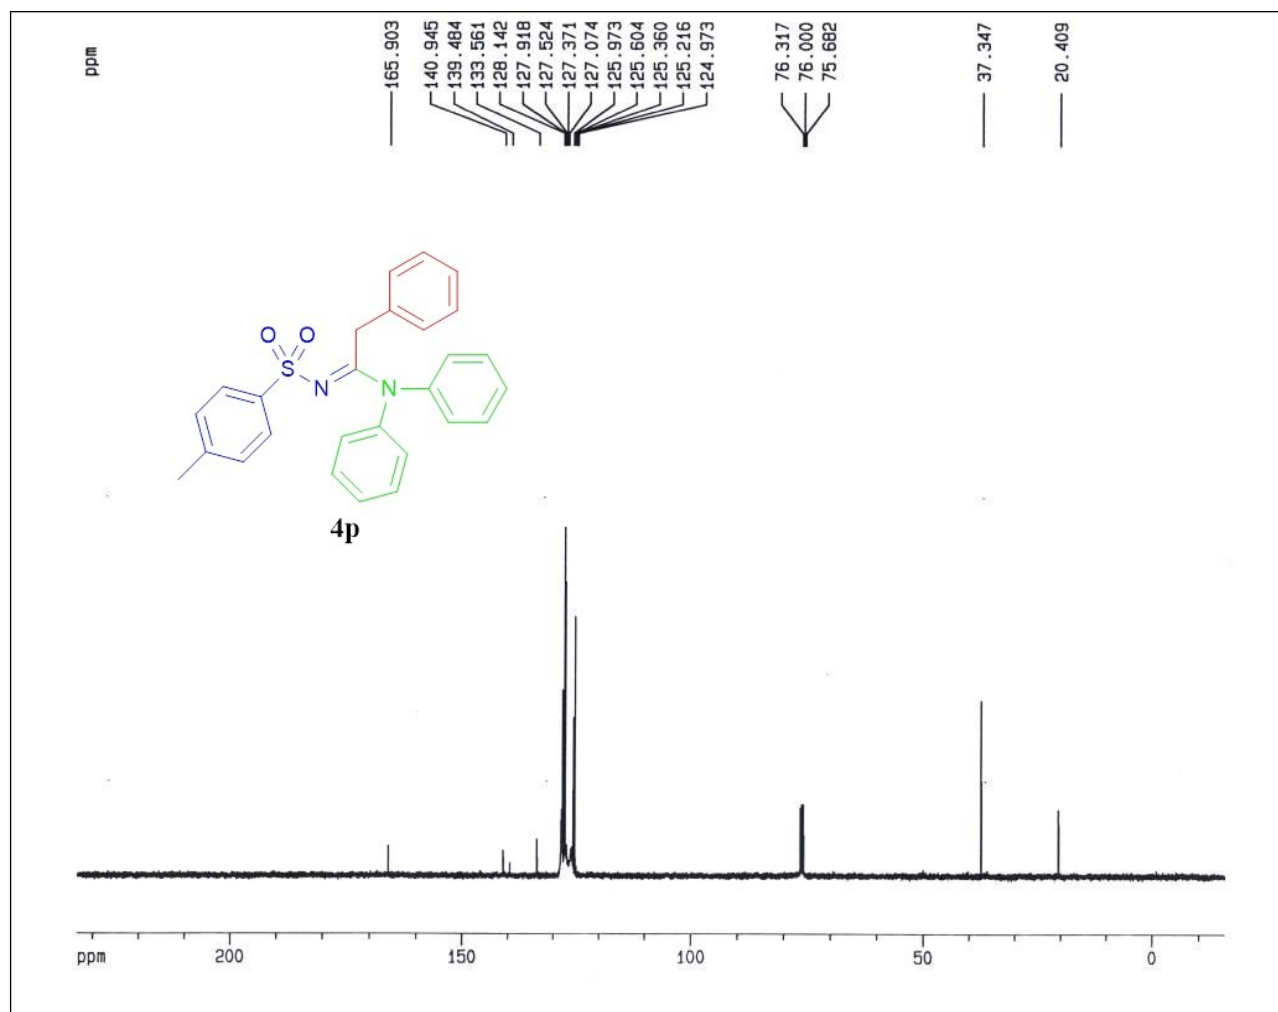

**Figure 91:** <sup>13</sup>C NMR spectrum (400 MHz) of compound **4p** in CDCl<sub>3</sub>.

For previous methods for synthesis of *N*<sup>1</sup>, *N*<sup>1</sup>-Diphenyl-*N*<sup>2</sup>-tosyl-2-phenylacetamide (**4p**), see reference **3**.

## References

- [1] E. J. Yoo, I. Bae, S. H. Cho, H. Han and S. Chang, *Org. Lett.*, 2006, **8**, 1347-1350.
- [2] (a) J. Kim and S. S. Stahl, *J. Org. Chem.*, 2015, **80**, 2448-2454; (b) H. E. Xinwei, S. Yongjia, H. U. Jinsong, J. U. Kai, J. Wei and W. Sufang, *Sci. China Chem.*, 2012, **55**, 214-222; (c) M. Jagadale, P. Bhange, R. Salunkhe, D. Bhange, M. Rajmane and G. Rashinkar, *Appl. Catal. A Gen.*, 2016, **511**, 95-105.
- [3] T. Yang, H. Cui, C. Zhang, L. Zhang and C. -Y. Su, *Inorg. Chem.*, 2013, **52**, 9053-9059.
